# Supplementary material for: Global Analysis of the Human Pathophenotypic Similarity Gene Network Merges Disease Module Components
Source: PLOS journal article supplement (doi:10.1371/journal.pone.0056653), 2013-02-21

## 1. CONSTRUCTION OF INTERACTOMES AND SEMANTIC SIMILARITY BASED NETWORKS

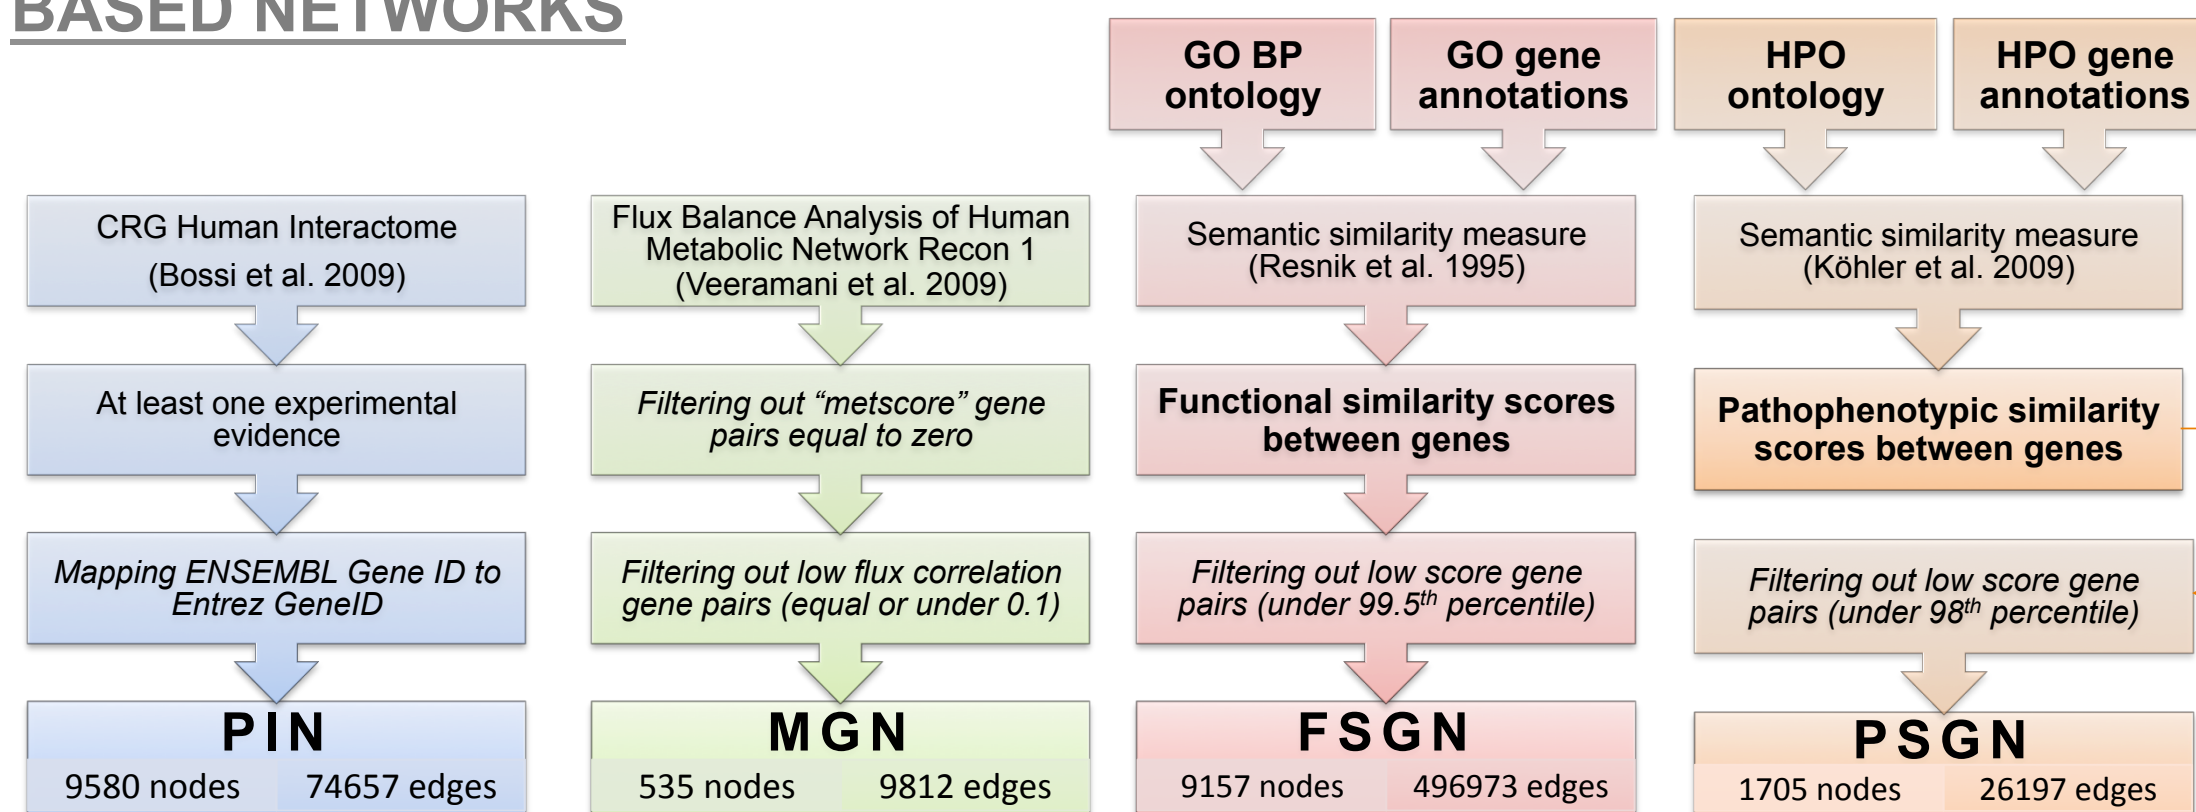

## 2. STATISTICAL THRESHOLD AND CUT-OFF SELECTION

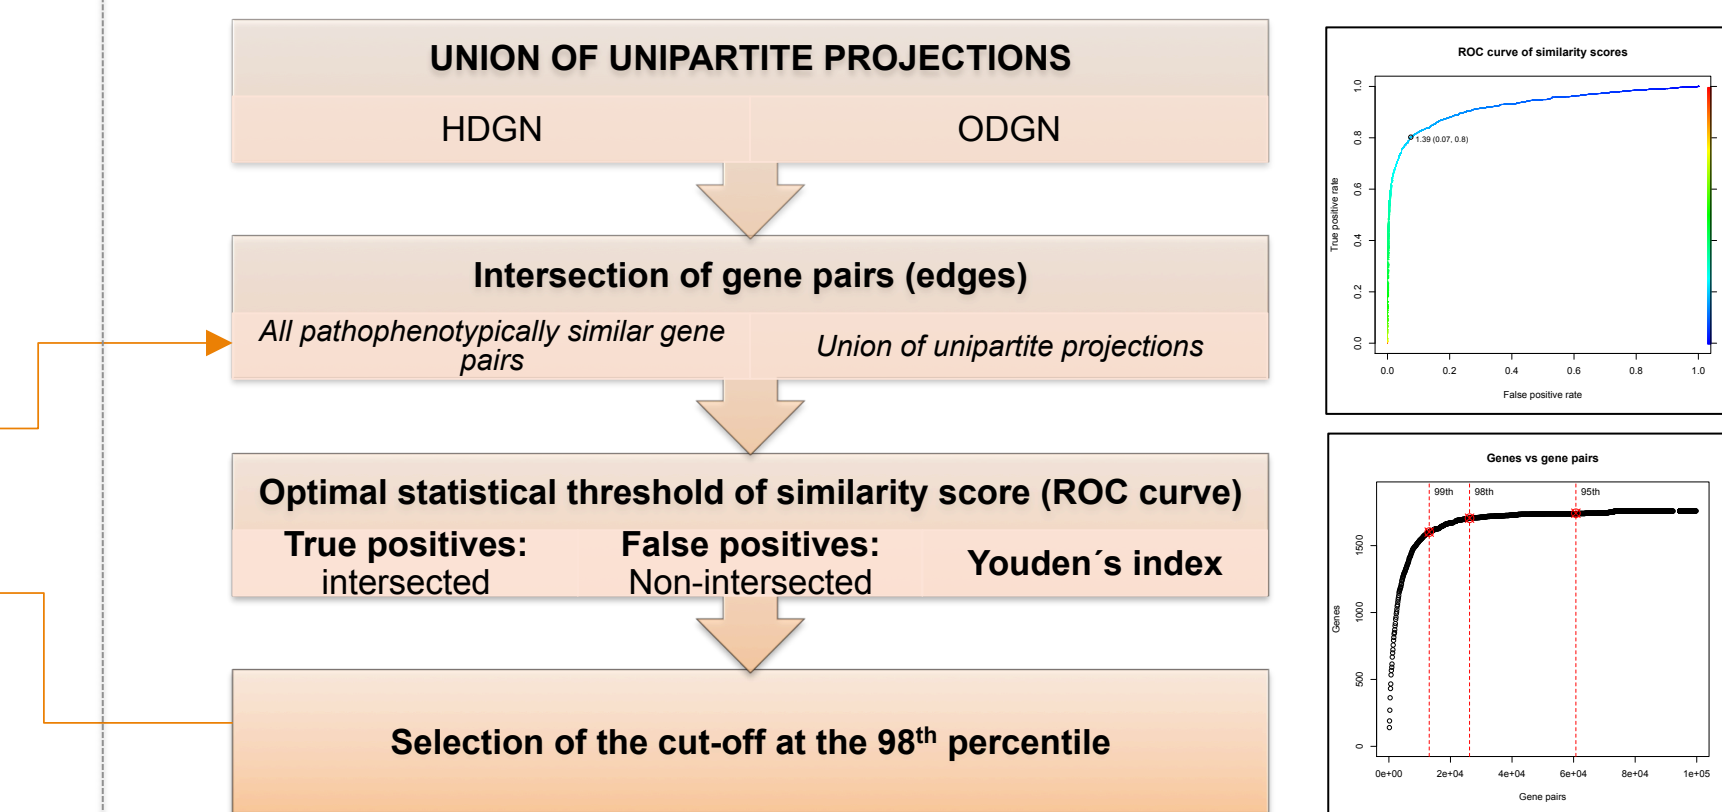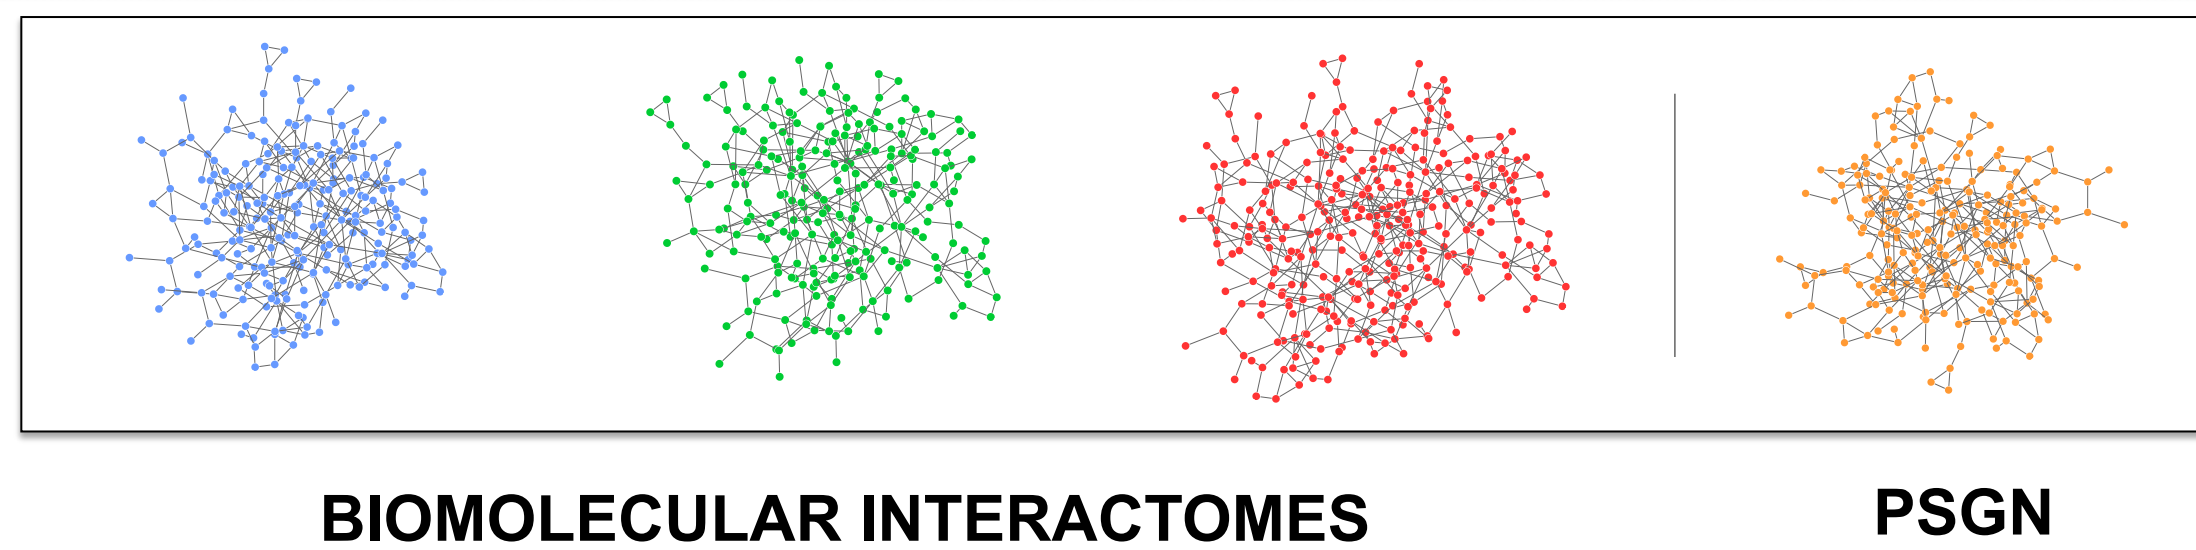

### TOPOLOGICAL ANALYSIS (node degree)

1. Mann-Whitney test for degree distributions of gene subsets
2. Spearman's rank correlation test of gene degrees

## 3. NETWORK ANALYSIS COMPARISON

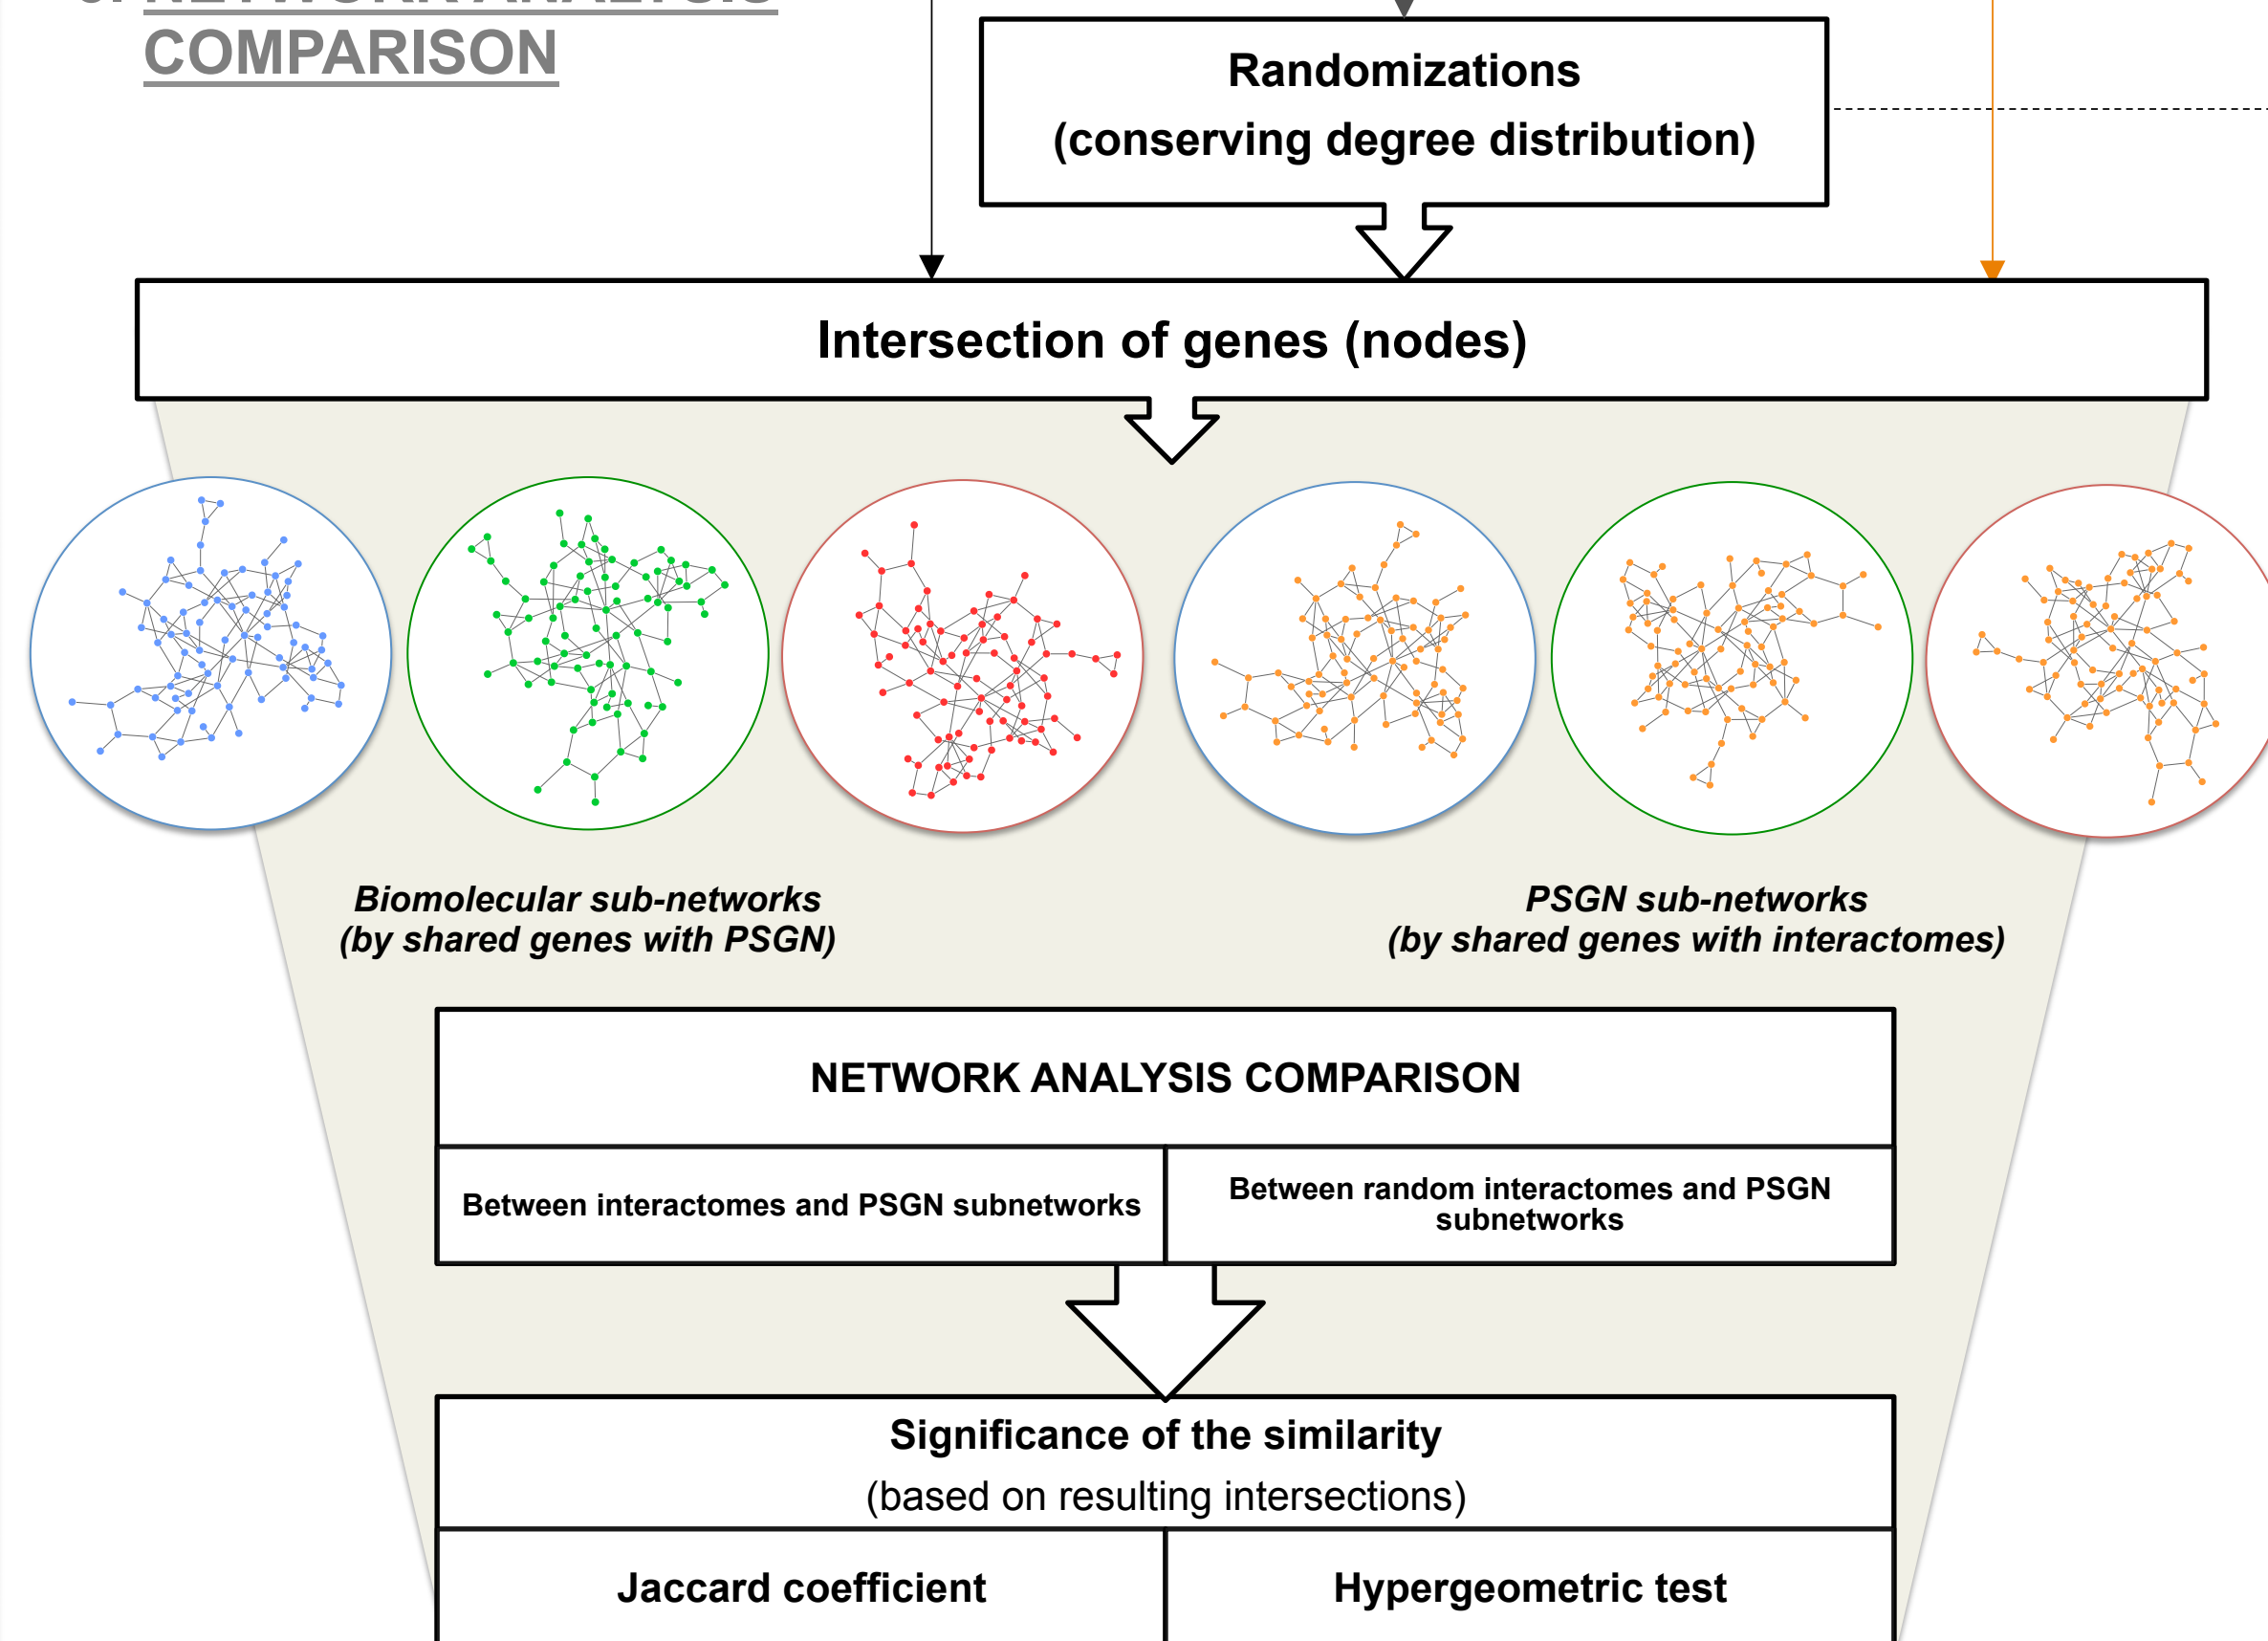

## 4. CALCULATION OF ROC CURVES BY INTERSECTED GENE PAIRS

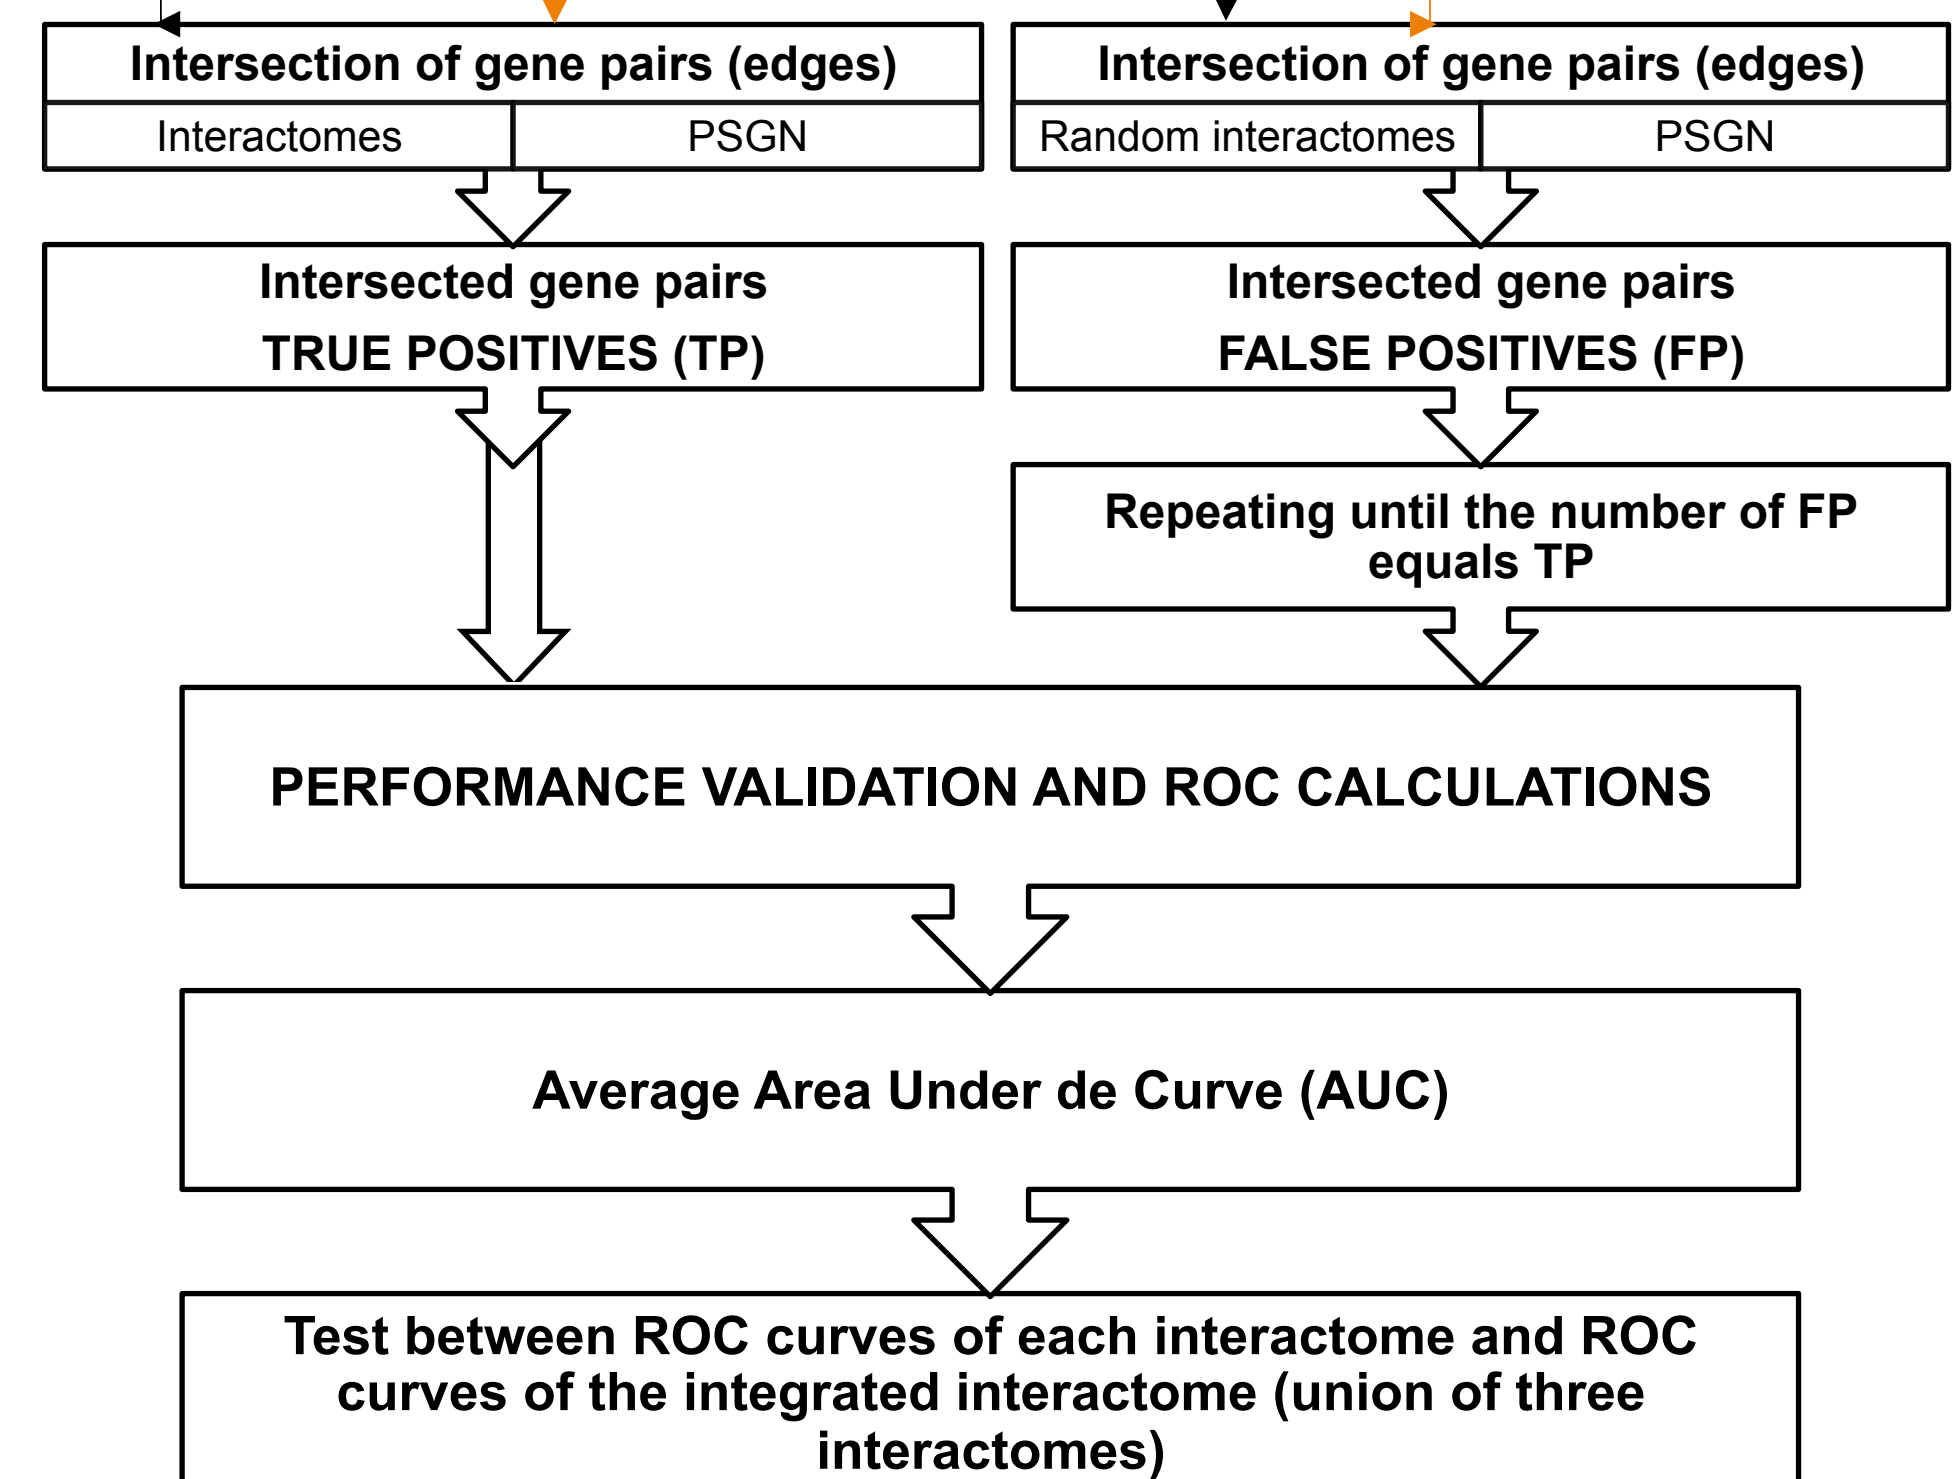

Supplement: S1 (10.1371/journal.pone.0056653.s001) [file journal.pone.0056653.s001]
