# Supplementary material for: Global Analysis of the Human Pathophenotypic Similarity Gene Network Merges Disease Module Components
Source: PLOS journal article supplement (doi:10.1371/journal.pone.0056653), 2013-02-21

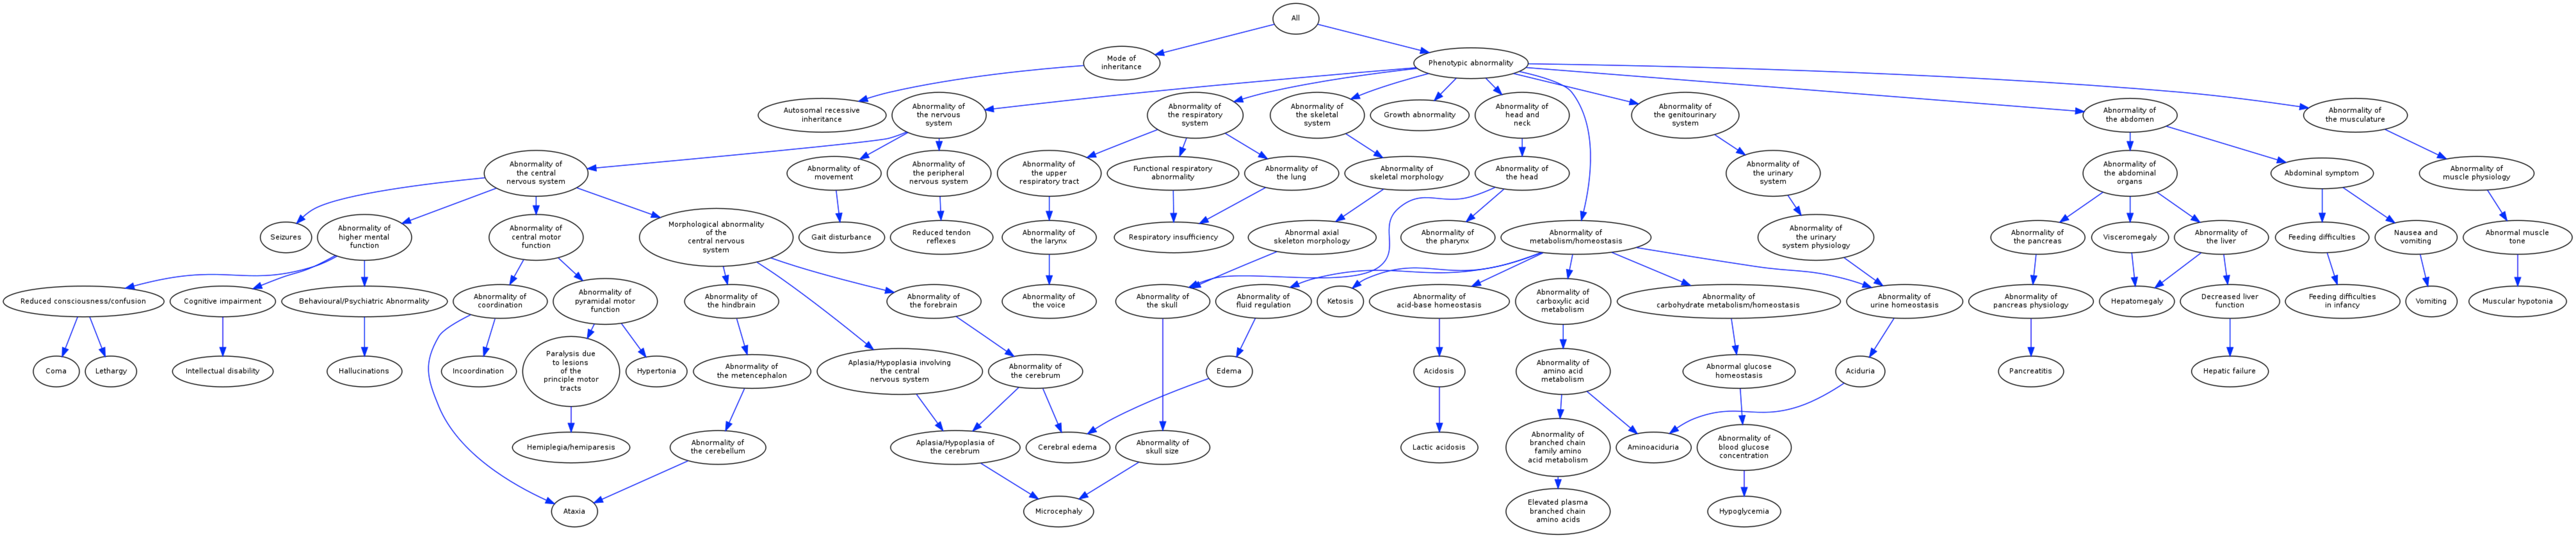

Supplement: S3 (10.1371/journal.pone.0056653.s003) [file journal.pone.0056653.s003]
