# Supplementary material for: Global Analysis of the Human Pathophenotypic Similarity Gene Network Merges Disease Module Components
Source: PLoS One. 2013 Feb 21;8(2):e56653. doi: 10.1371/journal.pone.0056653 (PMC3578923; doi:10.1371/journal.pone.0056653)
Supplement: Table S1 — Bipartite and unipartite projections of the updated version of the human diseases network. (XLS) [file pone.0056653.s004.xls]

## Sheet: Bipartite (HDN)
Entrez GeneID	MIM Phenoytpe
3291	218030
6335	167400
8312	607864
3145	176000
2672	607847
3265	218040
56922	210200
283989	225753
162417	237310
4640	607841
3908	607855
54829	607850
1373	237300
11277	225750
25836	122470
54332	607831
1281	130050
5956	303900
2934	105120
27022	607836
1278	130060
1277	130060
64087	210210
23607	607832
6532	607834
10484	607812
11285	130070
55640	225790
4204	312750
9990	218000
1471	105150
4646	607821
5663	607822
54345	607823
5745	156400
6340	264350
6337	264350
6338	264350
64241	210250
64240	210250
859	607801
3549	607778
5781	607785
4763	607785
23092	607785
4359	607791
51062	182600
6683	182601
80270	607765
7389	176100
3077	176100
7415	167320
6326	607745
4069	105200
335	105200
2243	105200
9414	607748
2052	607748
570	607748
7276	105210
79158	252500
6102	312600
25793	260300
7490	156240
79158	252600
9733	175900
84572	252605
5781	156250
6103	304020
1991	202700
3459	607948
3458	607948
1154	607948
30835	607948
345611	607948
6347	607948
6556	607948
3431	607948
4159	607948
114609	607948
54	607944
2626	607941
3845	260350
7157	260350
3293	264300
5244	147480
3853	167200
3868	167200
285440	210370
652	607932
3854	167210
3872	167210
25794	607921
2316	304120
57192	252650
3897	304100
85365	607906
1947	304110
147409	607903
6247	312700
55777	156200
5396	202650
4256	245150
132884	225500
2121	225500
10564	608097
3459	209950
3594	209950
6772	209950
3460	209950
6442	608099
79053	608104
9496	147891
7374	608106
2492	608115
5993	209920
5994	209920
8625	209920
4261	209920
1548	122700
2158	122700
1559	122700
79001	122700
1280	132450
7248	191100
7249	191100
4744	105400
6647	105400
5630	105400
1639	105400
10743	182290
1594	264700
5925	182280
8200	113100
1798	608093
1282	175780
51259	608091
3815	273300
6794	273300
2261	273300
2956	608089
27030	608089
5728	608089
999	608089
7157	202300
5903	608033
1244	237500
1311	132400
3651	260370
2581	245200
8842	608051
2260	147950
6716	264600
1280	156550
7473	273395
9509	225410
8085	147920
51119	260400
2629	608013
168667	608022
4166	217800
2652	303700
5956	303700
2521	608030
1075	245010
9639	608236
1300	156500
8546	608233
613	608232
1285	141200
1499	132600
4595	132600
57167	147750
4920	113000
2652	303800
1075	245000
5880	608203
59341	156530
9255	260600
5351	225400
5019	245050
57096	608194
4978	167000
207	167000
5071	167000
5290	167000
1499	167000
999	167000
9180	105250
7480	225300
7157	260500
2737	175700
57623	608175
7038	608175
5961	608161
7439	608161
4669	252920
83959	217700
51	264470
6448	252900
1001	225280
2244	202400
2243	202400
6690	608189
2192	608180
4137	260540
5961	608133
5192	202370
5830	202370
5194	202370
5189	202370
55670	202370
1278	225320
64221	607313
57167	607323
5116	210720
54808	607326
123041	210750
3242	140350
1540	132700
773	183086
1493	140300
6708	130600
6309	607330
1586	202110
79944	236792
8802	245400
50945	303400
100151683	210710
6311	183090
1524	607339
7248	607341
219844	236680
1053	245480
55775	607250
7045	121900
6687	607259
5080	148190
80025	607236
3239	113300
1584	202010
8195	236700
10984	130650
64324	130650
1028	130650
283120	130650
6913	260660
25915	252010
51103	252010
126328	252010
29078	252010
4719	252010
91942	252010
4723	252010
4720	252010
4726	252010
79133	252010
80224	252010
4694	252010
4724	252010
55572	252010
4729	252010
6389	252011
644096	252011
1312	167870
841	607271
5651	226200
60495	236730
153	607276
5729	607277
2706	148210
1832	607450
7046	132800
152137	607453
1029	155755
7351	607447
5048	607432
1747	104510
64131	264800
368	264800
64132	264800
57107	607426
57017	607426
27235	607426
23590	607426
54840	607426
56997	607426
4158	202200
3850	122100
3859	122100
10117	104500
8048	607482
3569	148000
80704	607483
1378	607486
8557	607487
2896	607485
6017	607475
79001	607473
6017	607476
51079	607464
5428	607459
9244	272430
360	607457
10585	236670
5644	167800
1080	167800
6690	167800
11330	167800
83959	217400
367	313200
1737	245348
8050	245349
611	190900
29123	148050
60	607371
1188	607364
91147	607361
1723	264750
2317	272460
6197	303600
51185	607417
641	210900
10243	252150
4338	252150
4337	252150
56246	607398
30813	122000
6566	245340
3239	113200
3784	607554
4148	140600
7020	113620
3284	201810
5071	607572
2138	113650
3909	245660
29851	607594
1282	607595
7045	122200
7443	607596
2065	607598
3073	272800
3848	607602
3858	607602
4598	260920
286077	130900
6439	265120
5447	201750
627	607499
11081	217300
64127	607507
4049	607507
10568	265100
1294	607523
286	182900
7045	607541
4629	132900
2719	312870
26058	607688
59341	113500
11128	607694
785	607682
2566	607681
5156	607685
6862	182940
6347	182940
81839	182940
4747	607684
54332	607706
2657	217095
137814	217095
6899	217095
55997	217095
5340	217090
81693	261100
8029	261100
9499	182920
545	210600
8036	607721
2623	190685
3039	140700
3040	140700
3043	140700
4359	607736
3561	312863
4747	607734
2057	133100
10019	133100
114327	607631
1181	607628
9076	607626
10577	607625
5873	607624
1146	265000
6335	133020
6609	607616
26229	245600
9217	182980
6794	175200
1639	607641
30813	148300
23592	155950
4041	607636
4041	607634
6777	245590
1589	201910
2706	148350
1832	607655
3848	607654
2760	272750
51135	607676
4359	607677
1959	607678
3897	303350
5354	312920
2694	261000
6513	606777
4089	175050
6606	253550
3914	226700
3918	226700
3909	226700
8291	606768
875	236200
2746	606762
11093	274150
3815	606764
6391	606764
6390	606764
5156	606764
1736	305000
3848	113800
3858	113800
37	201475
5080	106210
3691	226730
3655	226730
1373	265380
2294	265380
9049	219090
10516	219100
30008	219100
11277	192315
324	175100
1828	148700
4221	131100
6331	113900
958	606843
122042	219050
3640	219050
4552	236270
6523	606824
3239	192350
2271	606812
2778	166350
1816	606798
5144	606799
4524	236250
627	606788
3356	606788
659	265450
54658	606785
1277	166200
197131	243800
80144	219000
341640	219000
5664	606889
6392	606864
6391	606864
6390	606864
1294	226600
4312	226600
6899	192430
3209	140000
1896	305100
710	106100
9289	606854
23022	606856
261734	606966
2260	166250
4312	606963
3162	606963
6770	201710
8291	253601
7040	131300
825	253600
3914	226650
3691	226650
3918	226650
1308	226650
3909	226650
203859	166260
7018	209300
7299	606952
1278	166220
1277	166220
5339	226670
124590	606943
9640	606937
1278	166210
1277	166210
283652	113750
3784	192500
4089	174900
657	174900
2099	157300
1909	157300
7124	157300
2778	174800
3425	607016
8626	129400
6528	274400
8792	174810
55687	580000
3425	607014
3425	607015
146183	607039
8200	201250
2218	253800
1630	157600
128674	244200
261734	606996
25861	607084
54658	218800
50846	607080
5159	131440
54840	208920
4148	607078
53904	607101
472	208900
6023	607095
1678	304700
2683	607091
5428	157640
65125	201300
8288	261500
6445	253700
118429	236490
120892	607060
4609	113970
6908	607136
9095	201400
79087	607143
2332	311360
57674	607151
3596	607154
79147	607155
7068	274300
3295	261515
7157	607107
10913	129490
128178	129490
114548	607115
10804	129500
5077	148820
7849	218700
1806	274270
268	261550
269	261550
2737	174700
145173	261540
1415	607133
8626	106260
50506	607200
35	201470
554	304800
7045	121820
2316	311300
2566	607208
6323	607208
34	201450
57679	607225
29914	121800
4330	607174
5728	607174
4771	607174
1277	114000
5860	261630
3106	106300
200576	121850
5053	261600
147138	226400
11322	226400
60386	607196
50943	304790
5224	261670
85358	606232
51151	227240
2588	253000
2200	129600
6905	244460
2720	253010
78987	606217
2706	149200
367	312300
374654	200990
5631	304500
5805	261640
51715	201000
9401	218600
3098	235700
4948	227220
8924	227220
79058	606243
3998	227300
138050	252930
5456	304400
64327	174500
1588	139300
51422	261740
2799	252940
5257	261750
9839	235730
27019	244400
6223	105650
59341	184095
11315	606324
5979	191830
7380	191830
1294	131705
8195	209900
51057	209900
129880	209900
582	209900
22954	209900
583	209900
84100	209900
585	209900
80184	209900
166379	209900
79738	209900
54903	209900
91147	209900
55212	209900
27241	209900
123016	209900
55630	201100
57679	606353
3559	606367
5160	312170
3431	235550
4646	606346
23592	166700
1294	131750
6718	235555
4760	606394
3651	606392
1406	120970
627	209880
5979	209880
429	209880
8929	209880
1908	209880
2668	209880
114548	191900
5602	606369
1278	166710
799	166710
4041	166710
1277	166710
8572	166710
3852	131760
3861	131760
3691	131800
3852	131800
3861	131800
7148	606408
5354	312080
1280	184250
6662	114290
1513	265800
57338	606438
59341	184252
2138	166780
2201	121050
54822	105500
3141	253270
5091	266150
55764	218330
1280	183900
4591	253250
9451	226980
686	253260
1785	606482
1294	131850
5199	312060
6658	312000
6606	253300
3852	131900
3861	131900
51251	266120
55806	209500
2733	253310
2937	266130
55624	253280
1134	253290
1146	253290
1144	253290
6708	266140
6496	157170
617	262000
411	253200
10243	149400
2743	149400
9152	149400
2741	149400
3786	121201
3785	121200
3690	273800
3674	273800
538	304150
10594	600059
4647	600060
1186	166600
51151	606574
3852	131960
5745	600002
2990	253220
200942	236000
22861	606579
5339	131950
5313	266200
6606	253400
6607	253400
3034	235800
1290	130000
1289	130000
1277	130000
3315	606595
3981	606593
2737	174200
1289	130010
6792	105830
7337	105830
4204	105830
79147	606612
9820	273750
207	114480
3161	114480
580	114480
472	114480
5290	114480
11200	114480
3845	114480
675	114480
83990	114480
5245	114480
7517	114480
5002	114480
9821	114480
8438	114480
79728	114480
841	114480
7157	114480
999	114480
5888	114480
8493	114480
1281	130020
8241	311900
1294	132000
3708	606658
4976	606657
10133	606657
27232	606664
2033	114500
207	114500
5795	114500
201163	114500
5290	114500
4953	114500
4893	114500
5320	114500
5157	114500
595	114500
324	114500
701	114500
7097	114500
7099	114500
8915	114500
6790	114500
27030	114500
8313	114500
7157	114500
501	266100
6444	606685
5621	606688
7248	606690
7249	606690
23400	606693
4233	114550
324	114550
5290	114550
841	114550
7157	114550
8312	114550
1499	114550
5157	114550
1371	121300
1836	226900
117531	606705
149465	606713
1029	606719
347733	610031
2055	600143
26121	600138
5149	610024
4626	158300
6566	610021
7287	600132
79443	610019
8200	610017
2175	227650
2532	110700
26047	610042
1910	600155
81839	600145
59341	600175
4436	158320
4292	158320
54361	158330
2752	610015
36	610006
2055	610003
5621	600072
2159	227600
26275	250620
478	128235
50511	270960
3643	609968
120227	600081
3033	609975
5310	173900
2643	128230
6708	270970
23418	600105
9469	143095
6785	600110
2176	227645
9622	204700
3643	262190
10210	609923
2177	227646
7474	180700
9132	600101
95	609924
3064	143100
8540	600121
3684	609939
5071	600116
3845	609942
22930	600118
3459	600263
5896	609889
10117	204650
5350	609909
5663	600274
4137	600274
158	103050
4436	120435
2651	110800
5308	180500
6910	142900
2697	600309
1789	242860
51168	600316
5080	120430
134430	609887
650	235200
3077	235200
7369	609886
6514	227810
7010	600195
116085	220150
50485	242900
9856	600202
80207	165300
1298	600204
54714	262300
4627	600208
1861	128100
5728	158350
5076	120330
2255	149730
2261	149730
2263	149730
6712	600224
6023	250460
132158	220120
9333	609796
6295	258100
10128	220111
1340	220110
22868	220110
493753	220110
3955	609813
1056	609812
3075	609814
7050	142946
6519	220100
11136	220100
6469	142945
23384	600251
5589	174050
11231	174050
64805	609821
5256	306000
54583	609820
11078	609823
5308	180550
1528	250790
27429	610297
80207	258501
2153	227400
93183	610293
4000	212112
1727	250800
1080	219700
7040	219700
64218	610283
64218	610282
710	120790
6606	271150
201163	173600
222662	610265
788	212138
2301	610256
6584	212140
9759	600430
79813	610253
2316	314400
217	610251
2690	262500
65055	610250
4210	134610
1200	204500
6335	243000
10939	610246
5173	610245
26353	158590
118813	610244
1497	219750
4143	250850
79755	610227
8398	610217
55612	173650
5428	258450
494513	610220
2688	262400
7273	600334
387082	600320
3792	110900
94	600376
4853	610205
1829	610193
131118	610198
169792	610199
23414	610187
6795	243060
123606	600363
80184	610189
80184	610188
8626	103285
79621	610181
1548	211980
2064	211980
5290	211980
3845	211980
2074	211980
673	211980
1956	211980
3659	211980
5002	211980
5071	211980
1326	211980
841	211980
5519	211980
919	610163
7048	610168
5654	610149
5626	262600
1137	600513
9211	600512
56623	610156
147372	235510
153562	610153
2688	262650
11232	610131
4000	610140
1497	219800
56652	271245
1509	610127
5015	610125
10082	258315
730	610102
1497	219900
55163	610090
338917	610092
338917	610093
64170	212050
80324	600462
54982	204300
6927	600496
4200	610064
2155	227500
3075	235400
3078	235400
10878	235400
26191	180300
4795	180300
3123	180300
51744	180300
23569	180300
6583	180300
3586	180300
4261	180300
657	610069
1910	600501
1369	212070
1462	143200
4247	212066
5373	212065
1634	610048
6563	111000
2487	165720
1376	600649
79784	600652
1548	188890
6531	188890
9568	188890
1137	188890
1280	609508
9342	609528
23495	609529
1557	609535
4200	600669
3458	609532
1234	609532
282617	609532
5788	609532
65217	609533
4059	111200
2318	609524
64840	305600
1717	270400
1524	609423
3811	609423
6349	609423
3458	609423
30835	609423
6347	609423
6356	609423
3107	609423
3566	609423
6387	609423
3577	609423
89884	262700
10381	600638
2316	305620
340024	234500
5205	243300
10653	270420
9049	600634
4853	102500
2074	600630
652	600625
11155	609452
410	250100
3778	609446
658	609441
10661	111150
3480	270450
64127	609464
26128	609460
1201	204200
1491	219500
5244	600803
196527	262890
117156	600807
3596	600807
4589	600807
154	600807
51131	600807
3593	600807
3176	600807
6356	600807
7941	600807
240	600807
7124	600807
7356	600807
3852	609352
3123	181000
4038	212780
6121	204100
2811	258660
9968	305450
3248	119900
5345	262850
5660	249900
3119	212750
3117	212750
83893	102530
2798	228300
3766	600791
2299	600791
5172	600791
26580	600794
2617	600794
25978	600795
5324	181030
219736	609404
7170	609284
7169	609285
56652	609286
10020	600737
3386	111250
291	609283
10585	609308
121512	609311
4292	609310
26278	270550
79751	609304
2259	609307
6598	609322
10	243400
728294	600721
2317	150250
176	165800
5468	609338
5122	600955
1493	609755
4650	609753
100	102700
3712	243500
2688	173100
6023	250250
1417	609741
5443	609734
91179	600920
3000	204000
201163	135150
287	600919
2255	180920
2178	600901
4976	165500
23545	219200
779	188580
2512	600886
2623	305371
26580	270685
7879	600882
1411	600881
3717	600880
2153	600880
25782	212720
3887	158000
3892	158000
3889	158000
682	111380
5573	188550
8805	188550
8031	188550
9950	188550
5108	188550
51592	188550
8706	111400
53947	111400
51422	600858
6469	120200
5080	120200
2245	305400
762	600852
5625	600850
1302	609706
90	135100
23503	270700
7068	188570
4693	305390
79048	609698
64699	601072
3759	609622
3784	609621
3757	609620
80326	150400
9663	609628
64072	601067
65217	601067
9381	601071
6323	609634
5979	142623
7546	609637
1832	609638
7372	258900
286676	609646
114548	120100
9420	270800
427	228000
23385	142690
1286	203780
1285	203780
4359	180800
5376	180800
7084	609560
5313	102900
6262	600996
7840	203800
7827	600995
1687	600994
727	609536
3265	188470
9562	188470
5728	188470
4893	188470
775	601005
81704	243700
487	601003
3861	601001
4942	258870
5080	165550
83394	600977
60529	609597
4990	212550
7466	600965
283120	180860
3868	600962
3848	600962
7132	142680
1836	600972
4867	609583
117531	600974
1299	600969
1387	180849
259236	600971
2263	609579
1145	608931
5913	608931
1140	608931
4593	608931
7915	271980
1134	608930
1145	608930
1144	608930
2068	278730
9516	601098
5428	203700
7508	278720
5429	278750
4137	601104
7227	190351
10195	601110
7227	190350
1080	211400
6338	211400
1643	278740
23418	172870
925	608957
201294	608898
8997	608901
2072	278760
1565	608902
5314	263200
2161	234000
1280	150600
2073	278780
114625	111620
6331	601144
55806	203655
668	608996
6331	601154
9927	601152
83715	609006
2697	234100
3032	609015
3030	609015
23636	271930
2697	164200
3664	119500
38	203750
3030	609016
6591	172800
23314	119540
7046	608967
64220	601186
7507	278700
3575	608971
5788	608971
916	608971
915	608971
158326	608980
1421	608983
23405	601200
2260	190440
7490	608978
443	271900
136647	234050
3728	601214
1410	608810
3717	263300
23389	608808
79695	608812
3248	259100
4613	164280
7259	608800
7273	608807
57165	608804
1280	608805
6331	272120
85300	601238
3664	119300
79796	608776
91949	608779
54704	608782
6315	608768
724066	608768
2710	307030
26154	601277
8813	608799
627	164230
3356	164230
6532	164230
114625	111750
51741	133239
11178	133239
6049	133239
7048	133239
4487	608874
6444	601287
1421	601286
124583	251450
1814	190300
11132	601283
3664	608864
10516	608895
6591	608890
2737	241800
3897	307000
9215	608840
4763	601321
1747	190320
127534	133200
2707	133200
4647	601317
1376	608836
2304	241850
2070	601316
4626	608837
80025	234200
7428	263400
7547	306955
8106	164300
9499	609200
4846	601367
2147	601367
5583	601367
241	601367
2153	601367
1716	251880
1690	601369
2074	133540
27185	181500
1116	181500
4524	181500
65078	181500
3356	181500
1312	181500
1814	181500
6854	181500
55366	181500
4723	203450
2670	203450
7046	609192
5925	259500
11200	259500
7157	259500
6926	181450
477	104290
10436	211180
861	601399
1585	203400
4645	251850
2158	306900
6653	104300
4353	104300
2	104300
4846	104300
323	104300
5328	104300
351	104300
22976	104300
3077	104300
1636	104300
642	104300
9526	609180
9244	601378
6927	142330
7253	609152
8898	601382
285362	272200
348	104310
491	601386
64072	601386
8622	609161
3858	609165
1493	601388
5781	163950
3081	203500
11200	609265
390594	609273
79659	263510
103	127400
9129	601414
9657	609254
346171	601410
9927	609260
4625	181430
1674	601419
1134	601462
1145	601462
1144	601462
1140	601462
6399	313400
5897	601457
5896	601457
4668	609242
4668	609241
5352	609220
59341	181405
1674	181400
4750	263520
79659	263520
10397	601455
79083	609227
5307	119800
2271	150800
5351	601451
3257	203300
4000	181350
3373	601492
11155	601493
7139	601494
3507	601495
256297	609069
8869	609056
6521	112050
2617	601472
977	609057
85476	609060
3913	609049
6521	112010
1019	609048
83990	609054
55215	609053
5318	609040
6473	127300
1301	228520
28982	609033
860	119600
7306	203290
259197	609148
2074	278800
6935	609141
1296	609140
3977	601559
43	112100
1896	313500
1001	601553
6663	609136
6521	601551
3458	609135
7012	609135
7015	609135
6521	601550
2706	601544
1415	601547
5663	172700
4137	172700
7007	601543
3198	601536
1278	259420
1277	259420
6821	272300
79628	601596
11281	601583
5479	259440
7051	242100
59344	242100
242	242100
118429	228600
2157	306700
6495	608389
4041	259770
161582	127700
6329	608390
56975	259775
4522	601634
4524	601634
4552	601634
4548	601634
166785	251100
7051	242300
8820	182230
8322	133780
55835	608393
948	608404
54949	601650
2200	182212
8787	608415
388531	608415
1540	601606
84693	251120
760	259730
28962	259720
2296	601631
4286	103500
2099	608446
7292	608446
7804	608446
2729	608446
2155	608446
23365	601626
8301	601626
8833	601626
861	601626
3717	601626
865	601626
2322	601626
4869	601626
1050	601626
3815	601626
8028	601626
2120	601626
26511	601626
4026	601626
54904	601626
8021	601626
54862	608443
7390	263700
326625	251110
9365	211900
2591	211900
8074	211900
773	141500
170692	608454
4595	608456
8456	601705
5328	601709
7045	608470
6559	263800
7045	608471
24	601718
7299	103470
4286	103470
4948	203200
4157	203200
1291	158810
1292	158810
1293	158810
8431	601665
5468	601665
51738	601665
5167	601665
7350	601665
4160	601665
5697	601665
7352	601665
154	601665
155	601665
9607	601665
133522	601665
6492	601665
5443	601665
9672	601665
181	601665
5781	151100
404672	601675
2068	601675
2071	601675
6557	601678
84627	229200
7169	601680
4621	601680
7136	601680
7140	601680
2395	229300
3082	608265
79577	608266
549	250950
54982	601780
113189	601776
3000	601777
4313	259600
5897	233650
5896	233650
4594	251000
2317	112310
4907	211800
25953	118800
7100	601744
2200	608328
10312	259700
4205	608320
7299	203100
8600	259710
8565	608323
1535	233690
10225	211750
2131	133700
2132	133701
2052	189800
4846	189800
54332	608340
8647	601847
176	608361
7299	601800
2778	103580
7012	127550
5921	608354
4548	250940
5921	608355
4625	608358
6872	314250
653361	233700
54658	601816
3767	601820
375298	608380
4688	233710
1280	151210
26227	601815
4041	601813
55213	103780
2555	103780
3356	103780
50833	103780
126	103780
125	103780
9380	260000
1280	271700
8200	228900
2335	601894
1767	608644
1644	608643
79977	608641
4803	608654
10999	608649
471	608688
2700	601885
4041	601884
779	601887
26154	242500
26353	608673
4000	159001
355	601859
9499	159000
1302	601868
126326	601869
1536	306400
5290	182000
145873	608681
6310	164400
4148	608728
3827	228960
8557	601954
51371	601952
7454	313900
100506658	251290
84823	608709
3048	141749
3043	141749
3047	141749
259266	608716
4633	608758
3559	601942
55636	608765
7476	228930
4921	271665
3549	112500
3479	608747
5205	211600
4634	608751
79648	251200
56052	608540
3891	602032
6314	164500
4159	602025
113235	229050
3356	608516
121278	608516
2289	608516
4487	189500
189	259900
140803	602014
10060	608569
2103	608565
113278	211530
6331	608567
3784	220400
7100	608556
1584	103900
2623	314050
2643	233910
5092	264070
4683	251260
10804	220290
2706	220290
2707	220290
4322	602111
10555	608594
113278	211500
10841	229100
54716	242600
340024	242600
153201	242600
6622	127750
6620	127750
650	112600
8200	112600
658	112600
84168	602089
2324	602089
3791	602089
387129	608584
27130	602088
2978	602093
10083	602092
65217	602083
7045	602082
3106	608579
3105	608579
93986	602081
8878	602080
8792	602080
3315	608634
401	602078
2328	602079
9217	608627
2488	229070
54806	608629
3779	608622
22934	608611
10269	608612
8313	608615
593	248600
594	248600
1629	248600
1738	248600
80067	241080
1385	612160
7490	256370
55788	277380
25974	277400
50846	233420
5080	136520
5726	171200
27249	277410
4878	612201
3852	179850
4351	602579
2130	612219
56172	118600
54977	205950
51218	205950
70	612098
2677	277450
26047	612100
7421	277440
2706	602540
3166	612109
1120	602541
4868	256300
283989	277470
65125	145260
65266	145260
5251	307800
7274	277460
1593	213700
4254	145250
6513	612126
8048	612124
4792	612132
7450	277480
3295	233400
7003	108985
5339	612138
7809	602522
1188	602522
88	612158
966	612300
8792	612301
5167	602475
2492	233300
11005	256500
23474	602473
51305	612292
3199	612290
200894	612291
79152	612319
9119	612318
9241	186500
7391	602491
344018	612310
2645	602485
2296	602482
477	602481
5624	612304
23064	602433
6833	256450
91252	612350
3753	612347
10683	277300
5459	602459
1482	108900
5627	612336
7490	136680
64421	602450
3981	602450
3329	612233
64127	186580
8013	612237
5078	612227
5078	612225
4092	612229
3663	612251
7080	118700
9241	186570
3741	612240
2261	612247
3663	612245
5243	612244
219931	612267
57609	136630
2562	612269
6521	179800
2263	101200
4615	612260
149233	612261
348938	612281
57545	612285
57545	612284
1718	602398
64374	248800
9368	612287
6569	612286
148738	602390
345611	612278
6833	240800
4477	611928
4867	256100
4625	160500
5244	602347
23417	248360
1080	277180
6100	180104
1471	611953
3614	180105
6101	180100
4771	101000
1116	611960
165918	611943
8912	611942
845	611938
4000	248370
4891	206100
5979	171400
5925	180200
79577	145001
6524	233100
79577	145000
2532	611862
5696	256040
9533	248390
23301	611868
50814	308050
164656	206200
1836	256050
2733	611890
283	611895
374291	256000
4705	256000
6389	256000
617	256000
1738	256000
6834	256000
91942	256000
4722	256000
4723	256000
1355	256000
4724	256000
4695	256000
55572	256000
4728	256000
137682	256000
775	611875
2317	108721
2317	108720
4703	256030
7134	611879
7168	611878
783	611876
226	611881
7137	611880
5376	118300
8701	611884
158326	248450
9401	268400
1138	612052
1136	612052
412	308100
285498	612042
8842	612095
55131	612079
56606	612076
5333	151600
4125	248500
50484	612075
8803	612073
23435	612069
8575	612067
4126	248510
7157	151623
1029	151623
182	118450
4920	268310
5979	171300
23095	171300
4149	171300
6392	171300
6390	171300
2668	171300
55654	171300
7428	171300
6452	118400
387700	612018
56997	612016
4000	151660
10908	612020
100133941	126200
5133	126200
3119	126200
3123	126200
91869	612015
157570	268300
51360	308205
54205	612004
83872	603075
717	603075
629	603075
348	603075
3078	603075
10878	603075
392255	118100
10083	276904
7401	276902
4647	276900
7399	276901
79955	276901
8139	256850
23169	269250
2697	241550
116519	144650
22948	256840
7273	611705
6928	144700
201163	144700
6927	144700
4968	144700
7428	144700
11236	144700
695	307200
4254	611664
131669	276880
149461	248190
64419	160150
1785	160150
4618	160150
6469	611638
2261	100800
567	241600
8292	603034
6521	611590
2218	611588
1890	603041
6663	611584
8419	611597
4041	144750
4358	256810
7846	611603
4914	256800
2218	611615
5728	276950
859	611818
6330	611819
10142	611820
7439	611809
3557	137215
2064	137215
3659	137215
3553	137215
5290	137215
843	137215
[truncated: 1,863 more rows]

## Sheet: Monopatite (HDGN)
Entrez GeneID 1	Entrez GeneID 2
7015	727897
207	8493
617	6389
26012	60675
2642	3767
10804	2707
4846	5740
166379	79738
3651	5468
7350	9672
3176	7356
29078	4694
582	80184
5770	4760
2657	182
6392	6391
1738	4723
23365	865
1629	594
123016	55212
8891	8893
5290	5888
3176	3596
999	5728
1278	4041
4938	50943
8787	388531
675	9821
345611	6556
129880	22954
367	6041
26191	55024
3845	9821
51738	7350
8313	7097
7124	2995
183	2784
3845	5605
8660	9479
2706	10804
5468	7350
6347	3566
27235	54840
1234	282617
3123	6583
169026	2645
10984	1028
5290	701
5888	79728
2741	10243
23365	4026
3356	4524
5071	673
10878	83872
1814	27185
2064	2263
2068	404672
2213	26191
4481	675
6833	6934
5573	51592
1050	4026
1116	1814
1277	1290
126328	4729
25915	29078
114609	2532
1415	1420
79728	8438
155	9607
27241	582
7941	6403
2033	7157
675	8643
208	6833
3651	6833
3566	3811
585	80184
4233	5546
27030	7157
4893	701
3845	843
4705	4728
6347	6387
3356	55213
54829	7058
7012	653509
166379	51057
1277	1278
5167	6517
54840	56997
56997	57017
10644	6833
19	10842
3459	6347
5290	3845
650	658
26191	356
6492	7352
3107	6387
51131	7356
29078	79133
3172	6833
5167	6927
185	2784
4436	5395
10243	4338
5194	55670
1145	1134
54901	9479
1499	8312
4723	51103
4893	7097
348	717
582	585
126	4137
3161	79728
3172	3667
2261	3815
3159	3172
19	2690
3566	6349
4869	54904
7350	7352
22852	84930
55212	80184
207	4953
3159	8660
8625	5994
1548	5519
4893	5157
4705	6834
54903	582
1134	1140
3845	841
155	181
2074	673
55572	79133
8438	9821
1316	11200
26511	3717
4953	7099
4694	51103
5770	54901
4846	5583
30835	3459
3107	6356
999	7517
5770	2645
240	4589
3078	717
583	55212
23095	55654
169026	5078
5697	6492
1316	3557
1738	6389
22954	8195
23095	4149
3172	6928
5770	5078
841	8493
1312	6854
3119	3117
4723	4719
1154	4843
3845	1326
154	7352
367	463
4760	6934
1116	65078
10644	5167
5770	6517
91147	585
3119	5621
6517	6934
3458	3577
1326	5071
5888	83990
100133941	3119
3161	5245
595	7157
4720	79133
11200	675
3667	6927
208	6517
2064	3553
23095	7428
4893	5320
5157	7157
27030	5728
4976	10133
2120	8028
11200	8438
3717	8301
6041	8379
1548	1956
1312	65078
356	55024
4137	6908
1355	6389
54903	585
4729	80224
22954	54903
2064	3659
91942	4694
675	79728
3909	3914
2645	3630
5080	4284
51057	80184
6928	6934
55997	2657
2820	6517
129880	8195
8792	8878
4233	841
207	5157
64127	4049
91147	583
712	713
11200	841
169026	56729
133522	9672
185	5740
5972	185
129880	80184
23590	56997
3077	650
55572	4694
5727	5921
3566	6387
5002	5071
1816	1815
208	6927
154	3593
3815	861
154	6356
5167	4160
5795	701
4000	4607
26191	23569
324	1499
593	594
5468	6492
51738	5443
54840	57017
3990	8660
3159	5078
5167	181
6862	81839
653509	727897
4723	91942
10644	208
3990	56729
181	8431
6389	91942
3123	4261
2668	6390
3569	50943
56729	6927
7157	11200
11200	7517
6347	6556
3651	7466
5189	5192
7941	51131
6790	7099
1959	4359
154	7350
5573	9950
27030	999
51008	115908
50615	6403
201163	5157
4728	6389
3691	1308
472	8438
7157	8493
4618	1785
4760	5167
2642	3667
3458	6349
843	5551
181	7352
169026	3159
10019	4352
54977	51218
126328	4726
207	5320
5290	8493
2820	6928
843	8438
3691	3918
3651	5167
2820	3159
201163	207
5195	5824
1378	4843
570	2052
2120	865
27030	4953
11236	4968
5157	841
3458	1234
154	117156
4601	5728
208	3172
5167	8660
1316	675
5320	7157
5728	8795
2322	861
3459	3455
3119	5133
2033	8915
91147	79738
3566	7941
1967	8893
323	4353
2645	3651
4760	8660
3767	6927
1548	2158
5795	6790
1908	429
5741	846
7352	8431
129880	55212
5157	5320
55670	5830
2322	4869
23569	4261
1548	673
166379	84100
114609	2995
4149	7428
4724	51103
1959	5376
242	59344
57623	7038
91942	4719
5078	8660
7957	378884
4524	4548
8200	650
114609	3458
3640	122042
2645	54901
1316	999
653509	729238
4846	3077
6347	3577
3651	54901
26511	8021
207	999
117156	7124
201163	595
83990	8438
7157	8312
5245	8438
1316	4601
1738	4705
27241	54903
583	84100
8833	54904
2263	3845
2033	4953
4724	4726
4522	4548
1639	6647
472	5245
5630	6647
169026	8660
5290	4233
1524	6349
1050	8301
1312	1814
5770	3159
5194	5824
4337	4338
5290	5071
5078	6517
3811	6349
7099	7157
5961	6010
22954	585
27030	5795
117156	51131
4026	8028
54904	8301
1908	8929
55572	4720
79659	4750
1326	5519
4723	4728
4846	323
7099	8915
1959	57716
1145	5913
6790	7157
580	841
5979	55654
6833	6927
51741	7048
340024	54716
5245	7517
2213	6521
1326	1956
7941	11005
2820	56729
4723	2670
8833	4869
5443	8431
2642	3990
19	336
351	4353
51592	9950
1738	55572
5290	7099
1956	5071
5770	5167
1154	948
7941	240
583	8195
5468	6517
2690	336
240	51131
26511	4869
324	4953
2147	3026
3690	3674
4595	1499
4618	64419
181	51738
55572	4729
6927	6934
3857	3868
27030	6790
4160	6492
4595	999
3887	3889
1524	3107
1291	1292
4524	1814
8892	8893
5290	79728
5167	7466
10516	2006
2120	2322
2299	3766
117156	4589
2995	6521
181	5443
3458	5788
2071	404672
181	9672
2707	127534
7941	3593
11200	5925
1316	367
3659	1326
2993	6521
26191	4795
4719	80224
2657	23414
4000	10269
5443	7352
585	84100
91942	4729
859	4625
1548	1326
5770	2642
1080	6338
2324	84168
2033	5795
23092	5781
374291	6389
5157	4233
2120	4869
185	4846
6517	7466
3077	7389
4719	4726
27030	7099
583	22954
841	9821
57545	23322
123016	166379
2064	5519
3459	6556
3123	4795
1636	3077
675	2719
154	7356
2645	6517
126328	80224
5956	2652
26762	50615
7490	2719
7124	6521
11200	5728
5824	5830
6792	7337
26012	55636
4292	5395
2642	2820
4893	4953
4953	5290
91942	80224
2033	701
26012	84634
79728	841
2532	2995
1636	185
1292	1293
51103	80224
8438	5551
201163	6928
7517	8438
7428	4968
5002	5245
4481	4601
6517	6833
10878	3075
3845	5245
154	9607
154	181
4705	4724
116519	6101
201163	2033
7157	8915
91147	8195
7517	9821
3845	675
4760	6517
335	2243
1355	6834
8833	2120
2033	595
2532	2993
201163	6790
4026	8021
114609	948
201163	5320
714	713
4724	4728
2053	3949
2993	2995
2645	2820
207	79728
324	5795
10644	3667
4760	6833
2729	2099
51131	6403
2064	843
5290	2263
3655	3691
6927	7466
207	4978
1326	2074
5157	701
4720	4729
91147	27241
1378	3383
3043	3040
5002	673
3459	6772
2033	27030
4705	4722
6356	3176
2260	26012
3161	83990
55572	51103
91147	55212
5167	5697
19	335
5157	5795
126328	4720
4601	8379
3172	3990
4724	4720
3586	4795
2064	2074
6356	117156
5468	6927
3691	3861
323	6653
3845	7517
3667	5078
3767	56729
2099	1909
2532	4843
5290	673
27241	51057
207	5888
2110	2108
5290	472
207	27030
54901	8660
2263	3659
948	3383
5697	9672
5728	2956
7428	11236
4292	4436
3767	5167
5245	79728
2158	1559
6347	3811
4869	861
8891	8892
2642	9479
240	7356
4159	3431
5979	23095
154	155
3845	673
2642	5078
5770	3651
4481	8379
374291	4695
5157	8915
8074	9365
11330	5644
2820	3651
114609	2213
283120	64324
617	6834
208	5078
55572	91942
5108	8805
3458	1524
79955	84059
3172	54901
1116	1312
4893	3265
6790	7097
1773	356
4481	5728
2743	9152
5108	8031
1548	841
3868	3853
10644	6517
208	9479
324	5290
137682	6834
7124	1909
367	675
54903	84100
4719	79133
5468	155
595	7099
4353	6653
8313	5290
123016	54903
4524	1116
117156	3596
6356	7124
583	123016
4160	51738
1378	6521
10878	629
7012	729238
2322	4026
4524	27185
2153	4846
5961	7439
5078	54901
1316	4481
7058	8483
5972	1636
675	83990
3356	2555
3159	9479
5167	8431
166379	54903
4723	4724
1116	27185
1312	27185
3431	6556
3586	6583
4869	8021
27185	6854
2074	5519
5824	8504
5770	3767
7941	3176
3161	5888
1738	4722
629	717
1355	1738
26511	865
5002	79728
241	5583
5290	2074
114609	1154
2811	2812
1636	351
91942	29078
2260	55636
11200	8379
5468	5443
2052	9414
10644	3651
472	5888
2778	8675
4261	5993
2064	1326
60528	675
2213	3383
617	91942
4160	7350
4795	51744
5095	5096
2243	4069
137814	6899
207	8438
583	166379
55670	5828
11200	3161
5290	5002
64421	5897
8890	8892
3159	6934
3161	472
2645	6928
51741	6049
7157	9821
4159	6347
3918	3909
3990	4760
3815	23365
22976	4353
4869	8028
2820	6934
26191	50943
166379	585
4846	2
4694	4729
2741	9152
1559	79001
4160	9607
675	51684
5770	3990
5290	1956
154	3176
3596	4589
3176	51131
5788	3575
27241	585
3586	4261
23569	3123
2812	2815
183	1889
4160	5443
207	11200
26191	6583
3586	51744
3918	1308
54903	80184
27241	84100
5002	1326
5167	133522
3459	3588
207	7157
3383	6521
5290	8915
4353	642
5979	7380
25915	4720
1080	7040
22954	51057
1154	1378
2706	2707
2064	1956
5290	7157
181	4160
1137	1548
285489	375790
472	79728
5468	6833
83990	841
5770	208
3767	4760
3717	8028
60528	8379
6928	4968
4159	1154
6315	724066
5468	54901
3815	2120
1116	55366
2153	3717
4041	8572
324	7097
8200	9241
1548	3659
5290	3553
5290	7517
3651	3767
4481	60528
727897	729238
2018	6496
133522	5697
10644	7466
582	84100
30835	6347
1080	11330
5002	7517
324	595
2322	54904
4595	3553
3123	5133
3077	351
2053	2690
155	4160
1312	55366
25915	80224
5078	6928
54901	6934
169026	6517
51103	79133
171023	23451
30009	5732
2820	5167
3596	7124
1548	9568
4760	6928
10019	2057
5078	9479
3845	999
5002	8438
1499	999
5961	5959
23569	6583
3159	6927
1299	8483
6866	84634
5194	8504
27185	65078
6347	6349
3172	7466
1140	4593
51057	54903
166379	55212
208	6934
3621	8795
5290	595
4893	8915
3845	8493
5320	701
583	80184
4723	80224
3078	348
207	7099
30835	1524
123016	129880
4352	7066
54901	56729
2645	3172
11277	1773
1499	4978
133522	7352
429	627
60675	6870
2645	4760
23365	8028
4893	7099
999	675
3815	4026
5080	6469
79738	8195
1773	2213
675	7490
169026	3990
137682	4695
7466	8660
3557	999
2645	8660
1738	4728
3811	6356
3848	3857
5167	5468
2263	2260
6927	4938
27235	57107
5770	10644
4726	4729
4524	4522
3593	4589
1355	4705
1050	3717
3161	8493
55654	7428
3717	8021
5290	2261
54904	865
207	83990
5157	8312
583	582
1548	5071
30835	6356
5795	7097
2120	23365
4953	6790
859	85366
2731	275
4694	80224
2324	3791
183	4846
5080	5308
22976	3077
657	4089
3566	3577
6517	6927
3123	3119
1154	3431
3651	6928
3767	6517
4893	5795
3845	580
4729	79133
3667	6833
3659	843
185	1577
324	7157
2642	2645
2995	3383
22976	642
3159	6517
367	60528
6492	7350
1154	345611
4724	4729
7157	3845
1524	3577
841	1326
8313	4893
3553	3659
4595	3659
5328	642
4729	51103
10644	9479
116519	149998
3651	5078
2645	3990
55572	80224
1355	4722
5195	5830
472	9821
22954	55212
54829	8483
3161	9821
5320	5795
1908	627
27030	701
51057	585
2690	2693
1378	2993
51744	6583
1316	8379
79133	80224
1814	6854
5320	6790
10019	7066
10644	2820
4548	4552
5157	1499
5468	4160
4722	91942
348	83872
1636	5328
5770	8660
1355	4723
2155	7804
91147	129880
5290	675
23590	27235
3078	629
4724	25915
25915	4729
4595	2064
4695	6389
374291	4728
11200	83990
1316	843
3575	915
25915	79133
4728	55572
7097	8915
7157	83990
154	8431
1646	1109
335	4069
5290	3161
3458	282617
6389	6834
55654	6390
5896	5897
3077	642
91942	25915
4695	4705
4694	4720
64241	64240
2213	356
5728	3265
30835	3431
51738	9607
2692	2688
54840	57107
6934	9479
6391	3815
7941	7356
201163	4968
2322	8028
5979	4914
6349	6387
5993	5994
10842	2690
6347	81839
2645	5078
6790	8915
463	675
374291	4705
7097	7157
5468	5506
1756	4618
23322	91147
5078	7466
5167	9672
1548	1559
8833	2322
241	4846
5002	5519
1813	8910
114609	345611
5443	5697
6834	91942
8431	9607
5002	580
7124	7356
123016	79738
629	83872
51057	55212
126	6908
4625	85366
56729	8660
4723	6389
4705	55572
291	4625
1080	5644
7350	8431
3077	323
54901	6833
3458	3107
3651	3667
137682	1738
5925	2261
3356	1814
5194	5830
201163	4953
3593	3596
57545	91147
6892	6891
6890	6891
5290	843
6927	4968
5195	8504
10644	2642
4233	8312
6356	3593
2263	3553
5697	8431
5290	1548
2110	2109
201163	7428
30835	6387
3172	3767
7941	26762
6927	11236
5604	5605
8833	1050
29078	80224
675	5888
27030	2956
2690	3700
345611	3458
3700	3949
201163	8915
5167	7352
4953	5795
11005	50615
999	5888
11200	8493
1316	2064
4595	2263
10644	56729
3767	7466
169026	3667
5192	8504
7136	7140
5728	9562
861	865
10644	8660
580	7517
2263	2261
2213	4843
5078	5468
8313	7157
7941	3596
121278	2289
5290	2064
4601	60528
2642	6927
2729	2155
4846	2784
4026	4869
6833	8660
2033	4893
125	55213
118	5740
2147	4846
11200	5002
3691	3914
4723	55572
582	8195
5290	9821
6927	3569
8890	8893
65078	6854
1889	2784
91942	4726
374291	91942
4312	3162
3845	472
5888	7517
2099	2155
1137	6531
83990	8493
3078	3075
4948	8924
6892	6890
22954	27241
2263	2255
114609	6347
51738	7352
5189	5824
1050	8021
2645	3667
4724	126328
3596	51131
54901	6517
27030	4893
2033	324
91147	166379
3107	3566
6356	240
6532	3356
3290	9563
374291	55572
30835	3577
999	8379
3856	3875
4595	843
129880	54903
1028	64324
2778	6755
4359	57716
7941	117156
117156	240
617	1355
2064	5071
1738	91942
7157	5002
2642	5167
4705	91942
1967	8890
3651	6517
4026	865
1140	5913
123016	8195
5443	9607
3577	6387
1636	22976
22976	323
2261	6794
207	6790
169026	6934
181	9607
4869	865
91147	582
2244	2243
1636	2
3845	83990
2260	6870
11200	5245
4724	6834
5002	1956
915	916
2642	6517
6492	8431
3717	4352
19	3949
3172	6934
5770	56729
3577	3811
7124	4843
585	79738
6391	5156
3767	8660
5888	8438
1050	23365
1154	7124
10644	3990
123016	27241
617	55572
29078	4726
11005	2206
23365	8301
11200	472
3990	6833
4724	6389
5192	5830
64132	368
6934	7466
3107	3577
5002	9821
4723	4729
4948	4157
2820	7466
201163	5290
123016	84100
19	3700
201163	701
7124	3383
126	55213
5290	5519
7157	999
324	5157
3356	121278
208	3667
29078	4729
4720	51103
6390	5156
3767	6928
6390	7428
345611	3459
3159	54901
169026	6833
123016	51057
2099	7804
114609	2993
2322	8301
154	5443
2120	54904
5172	2299
181	5697
169026	2642
137682	6389
8028	861
5795	8915
4595	3845
351	6653
2033	6790
593	1629
26511	861
23365	4869
56729	6833
1639	4744
55572	6834
1956	5519
5468	5697
1145	1144
154	51738
26511	8301
54904	861
3172	5078
2645	7466
5468	56729
3990	6934
55654	6392
8833	861
5770	9479
10644	3767
19	2053
6347	6356
6389	644096
4695	4728
54714	24
493753	1340
7466	9479
4723	29078
27089	7381
617	137682
5468	133522
463	6041
5727	8643
6323	2566
5468	7352
4724	29078
2645	6833
1499	5071
3123	51744
673	5604
2064	999
585	8195
2642	4760
1050	8028
55572	29078
10984	283120
3667	7466
4723	25915
4330	4771
5443	6492
6531	9568
3553	843
4601	463
4722	4724
5376	57716
126328	4719
8313	207
3845	5925
169026	9479
675	8438
348	629
10243	2743
472	8493
7124	948
54904	8021
8493	9821
3458	6356
7941	7124
3667	8660
701	7099
3431	3459
23365	8021
27030	5320
595	7428
2260	6866
7157	841
1028	283120
3458	6556
8891	8890
169026	3651
374291	4722
23590	57107
999	5071
3040	387281
3077	5328
570	9414
137682	4705
3431	3458
999	60528
3356	50833
5795	7157
2099	7292
3651	56729
4705	6389
3159	7466
137682	55572
11277	55024
4522	4552
22954	80184
3172	3651
55572	126328
324	4233
5309	2301
6833	3630
374291	4723
2741	2743
169026	54901
7124	2532
5167	7350
80184	84100
5468	8660
5468	9479
2108	2109
1050	2120
4893	9562
5290	841
3161	5002
51057	582
653509	7015
8195	84100
23569	51744
2099	7124
4159	3459
1277	799
7169	4621
6690	1080
1548	5002
5167	154
8028	8301
1154	3458
2121	132884
7248	7249
3569	4938
55572	4726
1577	2784
8313	5795
4723	79133
7157	79728
4723	4694
3815	3717
3577	6356
183	5740
23590	54840
10243	9152
4720	80224
2690	3949
4261	8625
7012	7015
137682	4728
208	3159
3356	1312
4723	6834
169026	7466
5728	675
1145	1140
4160	7352
3575	916
1316	3553
2120	26511
3791	84168
5245	83990
6622	6620
392255	9573
3553	999
185	118
3717	4869
201163	7097
208	7466
91942	126328
4359	5376
3159	3990
3659	1956
11277	2213
2956	4436
1378	2995
675	7517
3159	5468
580	79728
2263	3557
3458	6347
4694	4719
3845	11200
4719	51103
118	1577
1577	1889
3990	7466
7157	580
1524	3566
2	22976
5157	6790
5959	6010
10644	6934
3043	3047
6927	8660
3845	3161
2064	3557
1956	2074
137682	91942
5290	3659
841	673
1308	3909
5077	5081
55366	6854
207	7097
4722	55572
3990	6517
3845	79728
1278	8572
2033	7099
2322	23365
169026	5167
675	3161
208	8660
7292	7804
3566	51131
1545	4653
1138	1136
2147	241
2820	5078
324	701
3030	3032
5245	5888
4846	6653
4722	6389
367	8379
2	3077
6927	6928
154	7941
133522	51738
3815	2322
1308	3914
4695	55572
8625	5993
617	4722
50833	55213
208	2820
336	3949
10644	6928
5167	9607
5728	8379
3356	126
240	3593
2074	5071
5959	6017
2820	4760
2147	2153
2033	7097
5888	8493
701	7157
1316	5728
999	580
29078	4719
114609	3383
3161	8438
4160	5697
6356	6387
999	2956
51738	9672
11322	147138
4261	6583
617	4724
11200	463
10878	348
10644	5468
126328	25915
999	4978
2956	5395
1548	2064
617	4728
463	8379
859	291
3667	54901
26762	6403
2213	7124
4159	114609
3815	8301
7941	2206
3107	3811
5002	2074
3075	60681
3172	56729
207	324
5290	83990
3767	5078
23365	861
6356	3596
583	129880
149775	8675
324	5320
2668	6392
117156	3176
1908	2668
4723	4720
4719	4720
3459	3594
3667	56729
1355	91942
208	4760
26012	6866
3569	4282
3691	3852
5468	181
3356	6854
6870	84634
5077	2308
10842	2053
27241	8195
3566	50615
5167	51738
4724	80224
4760	5078
2642	5468
26762	51131
4763	23092
3172	5167
5002	83990
4723	4726
6519	11136
8313	7099
580	83990
3077	4353
4261	5994
5189	5194
595	701
4160	8431
154	240
269	268
56729	6928
5290	7097
3577	6349
7517	841
617	1738
367	4601
4722	4728
11231	5589
2645	9479
3356	27185
1499	4233
3717	861
5167	155
55636	84634
1050	4869
6347	3107
10644	3172
6392	7428
55670	5824
10842	336
2729	7804
25915	4726
3566	11005
4695	4724
6356	51131
999	11200
4953	8915
126328	51103
1134	1146
1738	4724
30835	3811
3767	5468
324	6790
5078	6934
3458	6387
91942	51103
155	5697
27030	5157
114609	1378
627	8929
27185	55366
472	580
3123	100133941
50615	51131
169026	6927
100133941	5133
3691	3909
583	79738
133522	6492
2153	241
114609	51135
5195	55670
3667	5167
5071	5519
154	5697
5519	673
3845	5888
118	1889
2213	2993
5290	4978
8313	8915
129880	27241
2668	8929
5443	7350
4026	8301
3717	865
8313	27030
207	595
3815	1050
3043	3048
3159	5167
11200	79728
3990	5468
8200	658
2642	8660
123016	22954
149998	6101
6492	9607
367	4481
5770	7466
2668	4149
8833	4026
4719	4729
1548	3845
4723	126328
3460	3594
55366	65078
4953	595
3159	3767
2158	79001
580	8438
114609	6556
948	6521
117156	3593
595	7097
3172	5468
6833	6928
201163	6927
133522	5443
91147	22954
2322	8021
2206	50615
7157	3161
6927	9479
2642	7466
8301	861
3667	5468
429	8929
56997	57107
1355	137682
6303	51360
3176	4589
1154	30835
2064	3845
2153	5583
207	8915
11200	5888
3990	5167
207	5795
5697	7350
60675	84634
2120	3717
129880	585
2260	60675
201163	5795
4481	463
208	6928
4705	4723
5290	6790
1636	323
8313	201163
948	2532
181	7350
627	6532
2033	5157
3861	3852
54904	8028
3767	3990
5167	6833
79728	8493
1144	1146
3455	3588
2206	6403
169026	4760
5468	9607
6010	6017
3651	3990
3848	3868
2263	843
23365	26511
7350	9607
5078	56729
8313	2033
1499	841
5245	580
324	4893
5979	8929
8833	8021
5157	7097
3845	8438
2657	6899
1524	6387
27030	7097
659	4093
2053	3700
3889	3892
80144	341640
125	50833
2642	3651
2642	6928
5078	5167
154	6492
3569	64127
3431	6347
27030	8915
30835	6349
1738	374291
181	6492
2120	8021
472	83990
10644	2645
5913	285489
208	3767
6755	9049
3815	8833
5468	8431
5697	7352
999	5245
2993	4843
3667	6517
7352	9672
4728	6834
3651	4760
2147	4524
6928	11236
4953	5157
123016	585
5770	6927
6049	7048
4744	6647
183	1577
22954	582
841	1956
2668	55654
26191	3586
208	5167
5888	841
1340	22868
4846	5328
3659	2074
2995	4843
51057	84100
6347	6862
208	5468
8031	8805
2263	7291
3767	6833
374291	6834
4795	6583
54902	7381
336	3700
3990	6927
2213	1378
617	4695
11200	6041
6833	7466
463	5728
155	8431
2645	3767
4846	1889
7399	79955
2653	275
2820	6927
1738	1629
6927	7428
3717	4026
4846	22976
166379	27241
5728	4330
169026	6928
2	5328
1524	3811
1548	79001
3815	5156
137682	4722
11005	26762
22976	351
11277	356
4593	5913
4589	7124
999	3161
2820	9479
4760	6927
166379	8195
4724	91942
2120	8301
5468	6928
4893	7157
208	56729
6517	6928
169026	3172
57017	57107
5630	1639
81693	8029
7097	7099
114609	4843
2778	9049
3981	3662
7157	675
580	5888
207	701
3159	6833
11200	4601
8643	51684
2147	5583
129880	84100
3172	6927
999	5002
91147	84100
6337	6338
5264	5191
4159	30835
56729	9479
79738	80184
207	472
675	472
3659	841
4026	861
3596	7356
5728	3621
1967	8892
5888	9821
25915	51103
2206	26762
1050	54904
207	5290
22976	5328
25915	4694
4724	4694
3356	1116
5002	8493
123016	582
8313	6790
5468	154
843	999
201163	11236
1154	2993
201163	324
8313	595
595	6790
169026	2820
675	580
5189	5830
55212	84100
207	1499
4481	115908
1316	3659
8312	841
2993	3383
2657	1482
155	51738
948	2993
129880	79738
999	463
6928	8660
4149	6392
5002	841
3815	8028
126328	79133
3667	3990
207	5002
4353	5328
55212	8195
23095	2668
5189	5195
1738	6834
5167	6928
1548	2074
60675	6866
2033	5290
55572	4719
133522	155
5189	5828
6340	6338
5697	9607
154	3596
22954	79738
282617	5788
6347	1524
2645	5167
5078	6833
999	9821
3918	3914
374291	4724
6772	3460
5770	6934
2033	5320
1050	2322
5167	5443
3106	3105
26511	54904
27030	5290
2322	3717
2120	4026
1188	7809
617	54902
1636	4846
27030	595
23095	6390
201163	4893
4481	6041
51057	8195
5192	55670
6390	6391
3458	3459
6356	4589
2642	3159
1636	642
11277	26191
4726	51103
6690	5644
367	5728
4722	6834
2617	26580
1814	55366
114609	3431
8833	8301
2	6653
5290	8438
7157	8438
169026	5468
4726	79133
6356	7356
4595	1316
2642	54901
4893	5728
2213	948
7941	50615
25915	4719
642	6653
2784	5740
4695	4722
55997	6899
7157	472
91147	54903
[truncated: 655 more rows]
