# Supplementary material for: Global Analysis of the Human Pathophenotypic Similarity Gene Network Merges Disease Module Components
Source: PLoS One. 2013 Feb 21;8(2):e56653. doi: 10.1371/journal.pone.0056653 (PMC3578923; doi:10.1371/journal.pone.0056653)
Supplement: Table S3 — Different gene subsets in the human diseases network following proposed classification. (XLS) [file pone.0056653.s006.xls]

## Sheet: ALL GENES IN HDN
Entrez GeneID
2259
5071
217
3815
54704
1186
3845
1277
1001
5376
26276
1482
4647
182
5781
2934
9076
291
1280
1586
5625
51131
1154
3852
5191
54982
8312
1289
5913
1302
10084
1301
26090
7051
7253
5479
4286
390594
875
1029
55163
8803
8622
54658
3700
5167
283120
56616
126
1729
1294
4653
3356
5538
5148
79621
1747
286262
100506658
2065
1890
153201
9997
1203
139285
9215
2902
345
23418
6663
190
6495
1376
57010
57545
10369
3291
1499
2528
1462
2706
4353
1524
1991
6948
4625
7096
2068
6532
644
11154
7080
1588
10747
7248
54413
80776
8291
641
6010
6870
26191
51314
3508
226
9526
5896
7138
2
1406
3251
23385
5732
3651
23503
1585
4595
1497
2516
2683
90411
6342
4627
1816
84061
11284
2702
9531
6349
5080
859
6391
5077
54344
55213
4920
51778
4284
2261
2628
65125
54829
1281
79977
3988
5339
10683
3141
4983
340024
6272
6559
26119
23592
6329
95
1719
8195
6439
149233
7259
5925
773
10225
673
84146
931
3026
4088
8626
27031
2161
64421
2588
2316
8313
6262
59341
8838
4758
3767
3914
778
9907
9723
120227
11277
9445
5149
51067
8915
79648
10195
27429
55755
3030
2693
9119
55650
57505
9321
126326
27030
2642
83872
8540
50833
2263
3990
2176
6638
7066
4760
6103
11178
5265
2182
2064
38
27286
84930
1785
1639
4692
3458
5889
7036
5630
26047
1261
27086
3889
26580
866
23495
9289
5429
10913
60529
2677
8398
6389
8659
2664
25939
5213
4634
23545
5728
3507
999
2070
348
64788
22861
6392
1417
2260
4694
3239
4624
1663
3909
8787
114798
6712
51733
57167
8301
1716
55851
3736
2332
9217
3938
4318
55670
2131
3741
2072
5654
10075
7148
27241
165918
56975
3848
4618
9517
6606
57526
4882
1441
5621
5604
25782
65055
1373
1822
3859
4089
84693
2657
7084
3702
170302
1410
79659
7422
567
6774
471
7227
6330
5309
2719
785
2821
79803
4179
1285
4719
2624
658
4159
79796
199713
7434
779
326
5308
81693
56997
7480
2200
4000
7443
3708
57609
8565
5651
8462
949
7137
1136
2780
10491
284403
5015
5158
7169
3850
6786
388939
724066
2672
2178
2623
59344
3273
5727
8106
2348
7273
50937
6557
10020
1019
6331
4598
57679
3480
26128
65078
3717
64218
90167
26503
6928
23431
2071
3064
1584
4137
6521
91179
83696
10133
4982
5162
6927
149775
10002
7045
2542
9132
8086
3811
7401
9049
23314
2248
6925
6622
123041
1316
7157
1282
23562
3075
8864
22
7287
7592
627
1540
2038
3918
2937
1947
2022
54205
387281
4771
27235
2916
1643
5091
727897
775
55975
3426
22891
2395
9968
6125
4200
1438
4548
6452
79152
4256
388531
675
5961
183
23095
5009
1080
8573
6901
547
1311
23236
4843
324
5078
5428
2324
2731
343641
4668
6299
1041
23569
100151683
126410
23389
3569
3655
7124
2334
7046
80207
7428
60506
27130
3897
10117
3766
1471
1893
3594
57057
8200
617
81704
64446
7915
1577
2643
3053
6326
30813
55636
3386
6023
10060
6092
8542
6309
2206
4041
6347
9841
5546
80704
6323
57192
6324
7389
50940
10159
1959
585
3577
56916
11330
64087
4803
4620
91662
6303
2737
53947
272
6620
1278
2584
6935
3691
9381
672
4312
269
1950
5897
27247
24
2318
8842
8438
85358
9459
3315
5195
7852
60675
4001
26525
6295
3643
6854
6690
178
1591
1536
2243
210
3762
3667
4942
4072
8139
6905
6862
9897
3106
9129
8833
3373
6658
3795
154881
4233
201294
9342
170691
4723
57379
4092
4016
64324
70
846
861
79955
3614
9179
201163
3123
3561
2184
5290
7274
3849
56052
2629
203859
7015
2153
488
7351
80025
1605
23230
1836
7486
4157
138050
3459
8048
91147
79365
3856
55624
4976
2538
2255
9440
116519
6648
100
730
9927
114609
8031
9856
1145
25836
7345
9499
208
7415
1806
8517
154288
1356
8379
153562
283652
92002
9131
3117
760
169522
5979
5573
4893
54361
51360
4351
4998
3039
65217
8772
80270
83990
121278
4867
4322
3664
8022
2581
158326
7399
64699
1421
9639
2798
23175
429
93
10516
9420
6204
405753
3854
3784
26058
4795
11141
5333
10019
2653
5194
554
7078
6338
9733
8493
8288
6530
10166
1834
51218
410
5921
3077
7297
9126
2189
973
487
4607
2492
6017
200942
695
7054
5189
2778
130557
2632
55054
286077
23096
8481
2566
64240
1641
713
10397
84059
79133
128674
80271
285489
5373
27089
50506
1589
114625
4629
91574
7168
8701
8450
1644
6591
7474
2048
6340
3735
23556
7352
5447
285195
2703
374654
7454
717
23474
1180
80184
25953
5244
346007
64374
2729
51
56172
11213
2317
4864
9401
64327
2697
4117
51185
368
1545
28976
10568
10165
3785
4036
9524
411
24148
657
23396
1293
3798
64132
6390
22976
168667
2177
10577
6121
9439
6523
9060
5956
5723
2301
30008
579
538
94137
335
64581
10161
8243
10466
157570
7941
2771
2121
84662
351
5351
4952
1832
7498
7356
27329
5828
117144
659
3769
11216
133522
6261
25793
286
2273
7291
79188
3242
257
2271
79738
3040
8242
3977
4292
1292
91252
383
185
5311
10804
389434
1889
79783
2563
6583
7292
23676
8322
1910
4810
338
116442
23118
1908
768206
51592
7139
6834
6337
10686
7490
1756
220074
55129
9990
1013
7100
55777
256764
8241
83636
6335
5184
5696
8660
3853
161742
2218
5551
10743
51293
5745
131669
4914
6607
8675
7555
79644
79600
5095
2130
133396
668
1798
10008
6356
85320
79867
51168
6473
11132
84062
283
6197
10484
857
28962
593
1491
55764
3827
3818
7010
4669
4763
55131
57623
27032
2056
7276
3753
51422
3198
57449
57152
10319
4948
4204
1815
3162
9563
477
5096
1629
3000
145226
5972
3663
2312
126328
51135
83700
55687
8074
220296
89884
8988
2668
57096
23064
3712
2978
10461
5589
6949
3930
2998
1056
2290
3861
10157
4909
5830
514
5146
10381
8869
5345
3973
3858
2203
54714
2562
4729
81839
367
146059
1557
212
1583
29851
19
841
1369
207
57165
10216
7517
91624
2488
5627
6899
11234
8676
551
345611
4352
580
710
36
3748
6647
10483
4644
5122
1146
595
4830
871
7092
1493
4589
26154
7007
2099
1299
3240
4853
843
7879
977
5144
374291
3161
4724
2645
79577
60386
388962
4846
443
2245
4358
222662
54808
55806
4359
3981
3052
493753
10555
4128
1298
8546
23607
1075
1188
5250
2815
55157
1118
121340
3704
5002
51738
23590
407053
2165
4854
9509
79087
3908
1071
4990
55997
6492
2073
4953
64127
57017
3339
1778
6736
63929
6584
4488
200894
10644
1828
50846
176
5320
22948
10479
5631
3209
84667
23209
55212
1675
64221
546
5664
631
4524
2074
83394
22941
5476
1378
43
1861
767
4907
374462
11231
6934
5519
3659
8647
56652
2157
5205
55737
4693
2299
7436
10083
7102
7421
1736
9950
6772
6519
3290
3557
6855
10243
4160
54820
10585
84839
51151
84342
2710
1896
7018
1297
60
7284
30009
10908
161582
2020
1824
8635
1259
6444
762
60495
10269
5880
2213
6640
6100
81027
23301
1593
5346
56246
5831
3293
8671
346171
6891
25839
5396
2811
8815
1420
3728
6496
81
5063
6315
224
51206
2035
486
5264
79755
5605
7374
392255
6041
84823
54
950
64220
1234
51079
64131
4214
51103
6310
6853
255738
2743
23092
4038
355
825
1646
1621
4552
23405
123016
3593
238
147138
8483
4901
4143
5800
3074
29760
2690
121391
1414
64072
5328
5157
1636
7043
81031
948
3028
6476
8085
8792
4650
57465
3553
154
2799
22931
3559
23224
525
27022
2244
6768
53630
4054
1184
3759
5251
2158
221421
644096
3630
1103
29899
1814
9451
3425
51008
2147
23414
378884
6165
1340
5313
8929
5145
7021
6101
11322
6231
347344
79728
54332
259236
6201
79158
3891
146057
51259
50943
6487
2521
93183
2067
2652
1786
6445
2296
4361
5582
54453
50617
9839
84140
51196
64321
4148
6223
2053
1291
287
6926
2517
1116
57716
29914
653509
23435
3596
56623
5626
9241
55775
54209
5660
8795
5663
6888
132
186
64241
26277
1513
23384
4728
3265
5116
7508
3119
1137
8910
11078
6910
11136
57539
132158
582
701
5818
478
7350
5245
5788
2108
1981
51741
347733
6662
2812
128866
2784
84627
57477
4287
4338
136647
2688
682
3949
2052
5443
60528
3868
3875
2571
128178
8831
2892
7136
9570
23554
11146
5644
2671
1730
2512
57107
92211
1385
89781
3730
51021
1272
6898
2717
93986
2904
24140
200576
3199
55214
29071
718
1374
5995
4059
2992
7503
5994
26762
3284
114327
583
261734
11005
29954
7381
26258
112744
2746
1147
8260
4487
9227
3779
1559
2694
613
5583
55572
51082
1187
84634
84916
9370
5083
5962
6229
54716
56922
54949
215
8050
23451
2160
2304
27249
10128
6524
9821
167691
22868
26511
6821
80324
4626
284654
84282
8912
26040
7439
8036
8557
6708
8878
57104
79628
10436
3110
9896
283417
83737
114548
2202
9152
959
2175
26353
11081
8924
1415
1738
1308
6908
219931
83715
164656
7473
79650
356
8419
3207
10801
166785
91949
123606
9992
5048
1967
5173
3329
3778
5784
55145
149465
80331
1807
6556
3257
22954
463
135935
7957
59
3172
55811
54809
1201
84153
3514
6314
54805
11155
5108
3107
8456
771
6535
5903
10535
9247
10661
8492
3931
3166
434
259197
55366
23133
491
2903
5602
4609
1690
732
253827
4695
7319
10939
2752
2006
6654
7012
54795
3073
646960
123872
860
7841
2027
169026
2303
170692
23424
6597
29078
6218
4968
157680
4638
5159
6517
282617
7299
55343
1290
83987
7099
6683
7097
1509
22845
6890
6507
4306
375611
27185
359
669
79083
3158
1789
50939
7991
56606
1144
4593
6770
11200
7547
3860
1312
7040
8425
80326
2308
21
6833
65109
166336
145873
50814
6513
5318
2103
2548
3851
7466
155
5054
4851
78987
25978
5456
26504
22934
23345
406960
3566
58
8575
2057
3758
404672
27077
1678
80224
493856
11107
9702
7249
642
643418
1813
7414
4935
8625
6866
9672
54903
2990
54345
7546
81620
7050
2155
23322
4547
9782
50489
788
10758
1548
3048
3032
4591
50964
3033
6049
4281
4481
2187
249
3431
200879
3299
8643
545
9095
4175
55215
23529
445
3159
5468
5624
1829
2707
6448
3423
79058
54880
84168
22856
51062
124583
29978
4705
8323
51091
91942
11236
83959
4023
57338
5449
5243
1028
5459
2593
93589
7390
100422910
8891
3248
5192
6569
15
22852
1411
84920
84343
9842
6469
5837
55036
161497
6387
3674
6794
1073
117156
7704
1371
6531
8092
50485
56729
3060
10786
2289
6792
6795
56945
9255
4921
84100
5256
4645
4205
1413
2055
401
1287
9197
55651
5506
1811
118429
975
7225
1825
2554
1123
3034
3236
4070
7048
56244
83544
79840
5352
54757
55024
27034
1476
3460
1859
9663
4978
925
22995
2617
25915
2660
10082
11253
4068
162417
6399
4703
3043
268
57190
51305
10102
5888
55640
2898
81607
344018
79001
115650
3689
29929
57038
256471
2120
158
54968
64170
1687
8028
2626
2487
144165
4126
2733
3690
5498
2132
611
90
4340
51715
50511
5310
51119
375298
6790
57158
55135
4221
7170
2591
845
326625
4747
5317
30835
731
343637
4049
6718
2033
3105
127534
4868
1134
3549
54840
84733
1296
653361
7494
4838
79147
4915
2720
54583
6892
64423
54499
427
241
4683
83605
6872
285590
148738
25814
132884
54822
54904
191
3621
5236
9657
54806
3078
2997
92335
10456
1140
137814
57674
118813
2110
23020
5230
23479
79809
5133
26278
4633
22999
5307
3155
6915
9368
4601
3892
7056
594
4313
29958
71
7305
6311
2582
1674
79048
10558
2188
10564
10142
51128
4621
4069
4166
4722
83706
8905
3791
25974
2736
4646
7372
55605
27019
5726
113235
462
8572
7112
6916
338917
6528
23400
6687
37
51744
6657
153
145173
9211
7809
50674
714
197131
9607
344
6102
286676
2779
4330
3913
966
629
23363
2651
1594
1773
1718
9562
5092
55835
23417
57572
7476
2294
5261
3872
285498
5894
4860
6440
103
5199
147912
387129
10878
57560
8802
10210
7391
171023
4014
9622
2138
5744
10999
1630
50615
7369
50484
9180
26275
5354
716
189
3543
84464
92579
6755
10682
[truncated: 526 more rows]

## Sheet: MD-MG
Entrez GeneID
2259
217
54704
26276
2934
9076
1586
10084
26090
5479
390594
875
55163
8803
56616
1729
5538
5148
79621
286262
100506658
2065
1890
9997
1203
139285
2902
345
57010
10369
3291
2528
1462
6948
7096
644
11154
10747
80776
641
51314
3508
226
9526
7138
23385
23503
2683
90411
6342
11284
2702
54344
51778
2628
79977
3988
10683
3141
4983
6272
6559
26119
95
1719
6439
7259
10225
84146
931
4088
2588
8838
4758
9907
120227
5149
51067
79648
10195
27429
55755
9119
55650
57505
9321
126326
8540
2176
5265
2182
38
27286
7036
1261
27086
866
9289
5429
8659
2664
25939
5213
4634
3507
64788
22861
1417
1663
6712
51733
1716
55851
3736
3938
4318
3741
5654
10075
7148
165918
56975
9517
57526
4882
1441
65055
1822
84693
7084
3702
7422
567
6774
471
6330
2821
79803
4179
79796
199713
7434
326
7480
7443
3708
57609
8565
5651
8462
949
2780
10491
284403
6786
388939
2178
3273
8106
2348
50937
6557
1019
3480
26128
90167
23431
3064
91179
83696
4982
5162
9132
8086
23314
2248
6925
123041
23562
8864
22
7592
2038
1947
2022
54205
2916
1643
5091
55975
22891
2395
6125
1438
6452
79152
4256
5009
23236
343641
6299
100151683
126410
23389
2334
60506
27130
1893
57057
64446
7915
3053
3386
6092
8542
6309
9841
80704
57192
50940
10159
56916
64087
4803
4620
91662
272
2584
9381
672
1950
27247
9459
7852
4001
26525
178
1591
210
4942
8139
9897
9129
3373
3795
154881
201294
9342
170691
57379
4092
4016
9179
2184
7274
3849
56052
7351
1605
23230
7486
138050
79365
2538
9440
6648
100
730
9856
25836
7345
1806
154288
1356
153562
283652
92002
9131
760
169522
4351
4998
8772
80270
4322
8022
2581
9639
2798
23175
93
6204
405753
26058
11141
5333
7078
9733
8288
6530
10166
410
7297
9126
2189
973
487
200942
7054
130557
2632
55054
286077
23096
1641
10397
128674
80271
5373
50506
1589
4629
91574
8701
8450
1644
7474
2048
3735
23556
285195
23474
25953
346007
64374
51
11213
4864
4117
51185
28976
4036
9524
411
24148
23396
3798
168667
2177
10577
9439
6523
9060
5723
579
94137
8243
10466
2771
84662
7498
27329
117144
11216
25793
286
79188
257
8242
3977
91252
383
5311
389434
79783
2563
23676
8322
338
116442
23118
768206
10686
220074
55129
9990
1013
55777
256764
8241
83636
5184
5696
161742
10743
51293
131669
7555
79644
79600
2130
133396
1798
10008
85320
79867
51168
11132
84062
283
10484
857
28962
1491
55764
3827
3818
7010
4669
55131
27032
2056
3198
57449
57152
10319
145226
83700
89884
8988
3712
2978
10461
6949
2998
1056
2290
10157
4909
514
5146
8869
5345
2203
2562
146059
1557
1583
29851
1369
10216
2488
5627
11234
8676
551
36
3748
10483
4644
7092
3240
7879
5144
388962
443
2245
4358
222662
3052
10555
4128
8546
23607
5250
55157
1118
121340
3704
407053
2165
4854
9509
79087
3908
1071
4990
2073
1778
63929
6584
200894
1828
22948
10479
84667
23209
1675
64221
631
83394
22941
5476
43
1861
767
4907
374462
2157
55737
7436
7102
7421
6855
54820
84342
2710
7018
60
7284
10908
161582
2020
1824
8635
1259
762
60495
5880
6640
6100
81027
23301
1593
5346
56246
5831
3293
8671
346171
25839
5396
8815
81
5063
224
51206
2035
486
79755
7374
84823
54
950
64220
51079
4214
6310
6853
255738
355
825
1621
238
4901
4143
5800
3074
29760
1414
7043
81031
6476
8085
4650
57465
2799
22931
23224
525
27022
6768
53630
4054
5251
221421
1103
29899
9451
6165
5145
7021
6231
347344
259236
6201
3891
146057
6487
2521
93183
2067
1786
6445
4361
5582
54453
50617
9839
84140
51196
64321
6223
287
6926
2517
29914
23435
5626
55775
6888
132
186
1513
23384
5116
7508
11078
6910
132158
5818
478
1981
347733
6662
128866
84627
57477
4287
136647
682
2571
8831
2892
9570
23554
11146
2671
1730
92211
1385
89781
3730
51021
1272
6898
2717
93986
2904
24140
200576
3199
55214
29071
1374
5995
2992
7503
3284
26258
112744
2746
1147
8260
9227
3779
2694
51082
1187
84916
9370
5083
5962
6229
56922
54949
215
8050
2160
2304
27249
10128
6524
167691
6821
80324
284654
84282
8912
26040
8036
57104
10436
3110
283417
83737
2202
959
2175
11081
219931
83715
164656
7473
79650
3207
10801
166785
91949
123606
5048
5173
3778
5784
55145
149465
80331
1807
3257
135935
55811
54809
1201
84153
3514
6314
54805
8456
771
6535
5903
10535
8492
3166
434
259197
23133
2903
5602
4609
1690
732
253827
7319
10939
2752
54795
3073
646960
123872
860
7841
2027
2303
170692
23424
6597
6218
157680
4638
5159
55343
83987
6683
1509
22845
6507
375611
359
669
79083
3158
1789
50939
7991
56606
6770
7547
8425
21
65109
166336
145873
5318
2103
2548
5054
4851
78987
25978
5456
26504
22934
406960
8575
3758
27077
493856
11107
9702
643418
2990
54345
7546
81620
7050
9782
50489
788
10758
4591
4281
2187
200879
3299
545
9095
4175
55215
23529
445
6448
3423
79058
54880
22856
124583
29978
8323
51091
57338
5449
5243
5459
2593
93589
7390
100422910
15
1411
84920
84343
9842
5837
55036
161497
1073
7704
1371
8092
50485
3060
6795
56945
9255
4921
5256
4645
4205
401
1287
9197
55651
1811
975
7225
1825
2554
1123
3034
3236
4070
56244
83544
79840
5352
54757
27034
1476
1859
9663
925
2660
10082
11253
4068
162417
6399
4703
57190
51305
10102
55640
2898
81607
344018
115650
3689
29929
57038
256471
158
54968
64170
1687
2626
2487
144165
4126
2132
611
90
4340
51715
50511
5310
51119
375298
57158
55135
4221
7170
845
326625
5317
731
343637
6718
4868
84733
653361
7494
4838
4915
54583
64423
54499
427
4683
83605
6872
285590
148738
25814
54822
191
5236
9657
54806
2997
92335
10456
57674
118813
23020
5230
23479
26278
4633
22999
5307
3155
6915
9368
7056
4313
29958
71
6311
2582
79048
10558
2188
10564
10142
51128
4166
83706
8905
25974
2736
7372
55605
27019
5726
113235
462
7112
6916
6528
23400
6687
37
6657
153
145173
9211
50674
197131
344
6102
286676
2779
966
23363
2651
1594
1718
5092
23417
57572
5261
285498
4860
6440
103
5199
147912
387129
57560
8802
10210
7391
4014
9622
5744
10999
1630
9180
26275
716
189
3543
84464
92579
10682
7132
4615
79983
2592
11315
7306
1387
2254
1758
6697
9056
8997
255928
7252
9150
5224
2896
8547
7030
10717
11232
343035
79695
3082
51124
83552
641339
80781
4689
2979
2034
1767
85365
204
5000
6005
30062
10111
5324
338567
57817
54928
1120
1723
6785
1535
415
1053
7173
254065
23229
990
8604
6709
158866
147409
1141
2162
125336
203
65018
3945
540
84701
930
1121
5805
867
55612
10560
1634
79068
3684
84876
79944
146183
274
84668
1760
54862
4891
53904
23746
9719
2700
6514
54463
5860
389207
4534
3792
10528
387715
728294
81857
91869
358
51251
83893
3145
549
494513
11128
3679
2524
23111
5649
64175
8292
51099
9516
55084
55120
6208
285440
8985
11281
1837
7840
100134444
120892
6611
11235
3476
8600
6011
6913
196527
284086
27232
169792
121512
79042
282996
4477
6716
2646
3590
735
84233
4040
4688
284119
55149
114902
387700
55788
6598
3081
112817
388552
259266
55172
81794
5255
55505
4640
29123
124590
1027
149461
55630
6777
26121
55315
64805
26229
1804
80208
219844
6134
3587
339983
331
5257
1727
3939
1258
5873
35
23218
727
1565
9533
4247
1737
2159
142680
80746
345895
5832
4878
10559
5314
9759
348938
3998
686
8443
9210
63894
5729
7003
5019
2036
134430
5340
6555
11093
7507
84572
18
3098
85300
6135
1380
51371
8287
51807
55800
50945
339829
64840
8518
79784
7504
51114
9313
92344
360
4053
2192
81846
847
2328
64093
26227
11254
5176
9051
285362
8754
440138
4594
7172
147495
1200
6443
2705
28956
3479
4308
23171
54938
94
79053
1135
131118
4613
219736
30061
729
88
79751
85476
22858
3920
6563
51324
7341
256297
147372
2639
1717
5444
2235
254170
10
152137
3955
23765
7098
2625
56262
10312
9187
2201
34
6491
5269
1130
7317
23189
116085
54507
23636
435
5076
974
54414
387082
4643
8813
9820
9496
6442
84623
8013
6567
4010
23594
10653
4158
8898
91647
7849
889
5892
9333
84295
246213
9469
5274
57697
7846
5836
7827
4329
81622
79947
5053
1528
3786
125972
79443
112752
2335
28982
10841
1300
113189
29968
9640
11285
197322
2010
2760
140803
79813
8820
9382
23169
5521
2253
1741
10594
23022
265
4125
501
1181
9380
919
3418
4208
920
6247
146227
4792
412
1244
80067
1161
7020
10046
958
229
783
5277
22930
175
3490
1604
25794
640

## Sheet: MD-PG
Entrez GeneID
1186
1277
1001
1482
4647
182
5781
291
1280
5625
5191
54982
8312
1302
1301
7051
7253
1029
8622
54658
5167
1294
1747
9215
23418
6663
190
6495
1376
2706
4353
1524
1991
7080
1588
54413
8291
6010
1406
3251
1585
1497
2516
4627
1816
84061
9531
5080
859
6391
5077
4920
65125
54829
1281
5339
23592
6329
149233
773
673
8626
27031
2161
2316
8313
6262
59341
340024
778
11277
9445
3852
3030
3990
6103
1639
5889
26047
23495
60529
2677
8398
6389
23545
2070
348
6392
2261
3239
4624
3909
114798
57167
2332
9217
2131
2072
6606
5621
25782
4089
2657
170302
1410
7227
5309
785
5728
2624
779
56997
2200
4000
7137
5015
5158
7169
2672
2623
5727
7273
10020
6331
4598
57679
3717
64218
26503
6928
1584
4137
6521
10133
10002
7045
2542
7401
9049
6622
1282
7287
4625
1540
2937
4771
775
3426
9968
4200
5071
675
5961
8573
6901
547
1311
5078
5428
2324
4668
1041
79659
7046
80207
3897
10117
1471
81704
2643
6326
30813
6023
10060
4041
6323
6324
1959
2737
6935
24
2318
8842
85358
3315
6295
3643
6690
1536
3762
4072
6905
6658
64324
70
846
3614
201163
3561
5290
2629
203859
2153
488
80025
1836
4157
8048
55624
4976
8200
5376
9927
9499
7415
8517
1186
2719
5979
5573
54361
51360
4286
65217
83990
121278
4867
3664
158326
7399
64699
1421
10516
9420
3784
554
1834
4607
2492
695
2778
8481
84059
114625
7168
6591
6340
91147
5447
7248
2703
374654
7454
717
1180
80184
5244
56172
5308
2317
9401
64327
2697
10568
10165
3785
657
2263
6121
7015
538
64581
4760
10161
157570
2121
5351
4952
1832
3769
6261
2273
7291
3242
2271
1292
10804
1889
116519
2301
1910
4595
4810
7139
7490
1756
7100
6335
2218
5745
668
658
6473
57545
6197
4763
7276
3753
51422
2260
3162
477
3000
627
5972
3663
2312
51135
55687
220296
3459
2668
57096
4893
23064
3930
4204
10381
3973
367
212
3077
207
57165
7517
91624
345611
710
5122
871
1493
26154
7007
1299
3569
4853
861
977
2645
79577
60386
54808
55806
3766
4359
3981
1075
1146
55997
1908
3339
6736
4488
50846
176
3651
10913
5631
3209
546
5664
2074
1378
8647
56652
5205
4693
10083
55636
1736
6772
3557
10585
84839
51151
1896
1297
6899
1298
6444
324
2811
3728
6496
54714
2068
1785
392255
4038
4552
23405
123016
81839
3767
121391
3028
3559
1184
3759
5002
3630
3425
8792
5313
6101
79728
54332
4548
79158
51259
50943
2652
2296
4148
56623
9241
6337
5660
368
64241
26277
1137
57539
701
64127
659
2688
5443
5663
4914
2512
718
4059
5956
114327
1234
261734
11005
29954
4487
613
19
4626
7439
8557
6708
79628
9896
1373
114548
26353
1415
8419
9992
3329
22954
59
5925
7157
11155
10661
3931
6654
3075
7299
7099
7097
4306
84634
617
4524
80326
50814
6513
1814
7466
5921
23345
58
1678
283120
3107
351
7414
4935
2155
23322
4547
3458
3048
50964
3033
249
3431
6927
1188
5624
1829
51062
27185
6390
3106
83959
4023
6833
3248
6569
6469
6531
3596
1413
2055
7040
118429
7048
22995
3043
4159
1285
2733
26580
4747
8195
4049
2033
6794
3549
1296
79147
2006
2720
6792
2617
1278
79809
1312
84100
5133
1674
4621
23095
3845
4646
2566
338917
2255
3913
2158
23414
55835
7476
5894
60675
948
2138
2071
7369
50484
6017
5354
5551
4233
629
5160
7012
7038
11200
7134
4210
10021
2707
171023
1116
1545
4352
5328
5896
283989
2690
55812
7068
6566
7941
4436
3265
7428
3868
9573
6908
652
3757
841
117531
3872
5350
25861
7450
9244
54903
8929
472
3861
5172
3848
3123
113278
6609
5156
3295
4254
2532
79001
843
54840
2729
2147
5468
57502
6532
8074
1289
1080
3858
1636
6556
3172
4292
10269
3588

## Sheet: PD-MG
Entrez GeneID
3700
4653
6870
2
5732
6349
55213
4284
3026
9723
8915
2693
2642
83872
50833
6638
7066
11178
84930
4692
5630
3889
4694
8787
8301
27241
5604
3859
4719
81693
1136
3850
724066
59344
65078
149775
3811
387281
27235
727897
388531
4843
2731
23569
3655
3594
1577
2206
5546
7389
585
3577
11330
6303
53947
6620
269
5195
6854
3667
6862
8833
3856
8031
208
8379
3117
429
3854
4795
2653
8493
51218
64240
713
79133
27089
7352
64132
22976
30008
7356
5828
133522
79738
6583
7292
51592
6834
8660
3853
6607
8675
5095
593
57623
1815
9563
5096
1629
126328
5589
4729
580
6647
4830
4589
374291
3161
493753
2815
51738
23590
6492
4953
57017
10644
5320
55212
11231
6934
5519
2299
9950
6519
3290
4160
30009
6891
1420
6315
5264
5605
6041
64131
51103
2743
23092
1646
3593
147138
8483
3553
2244
644096
51008
378884
1340
11322
2053
57716
653509
54209
8795
4728
8910
11136
582
7350
5245
2108
51741
2812
2784
4338
3949
60528
3875
7136
5644
57107
5994
26762
583
7381
1559
5583
23451
9821
22868
26511
8878
9152
8924
1308
356
1967
463
7957
5108
9247
55366
491
4695
169026
29078
4968
6517
282617
1290
6890
4593
3860
2308
3851
155
2057
404672
80224
642
1813
8625
6866
9672
3032
6049
3159
84168
4705
11236
1028
8891
22852
6387
3674
117156
56729
10786
2289
5506
55024
3460
4978
25915
268
5888
2120
8028
3690
5498
6790
2591
3105
127534
6892
241
132884
54904
3621
137814
2110
4601
3892
594
7305
4069
4722
3791
8572
51744
7809
714
9607
4330
1773
9562
2294
50615
6755
65266
51684
2555
100133941
149998
2820
85366
275
3586
7140
125
4093
55654
916
54901
5824
54902
1326
10984
8706
4337
2741
2109
8021
60681
4522
7380
7058
4149
54977
4026
1050
3176
323
4726
26012
4869
3887
181
729238
1138
2692
166379
9365
4720
64419
5081
341640
9479
915
8029
5993
8504
1355
240
242
54790
5395
4282
9414
5770
115908
5741
122042
5959
3047
5697
2322
570
3383
3575
336
7804
129880
3857
6403
712
80144
9568
4750
4938
137682
1909
375790
1956
7337
2993
2670
1109
6653
8805
4744
5795
1286
118
3640
8893
5740
8431
10842
51057
799
8892
8890
3455
3662
2018
865
23365
2995

## Sheet: PD-PG
Entrez GeneID
5071
3815
3845
5376
51131
1154
3852
1289
5913
4286
283120
126
1277
3356
153201
57545
1499
4625
2068
6532
7248
26191
5896
3651
4595
2261
340024
8195
5925
64421
3767
3914
27030
2263
4760
2064
1785
3458
26580
10913
5728
999
2260
6010
55670
3848
4618
1373
79659
2657
2719
291
1285
658
4159
5308
1294
2071
6927
1316
7157
3075
627
3918
4548
183
23095
1080
324
3569
7124
7428
3766
1639
8200
617
55636
6347
1278
3691
4312
5897
8438
60675
2243
3106
4233
4723
861
79955
3123
7015
5727
3459
91147
2255
1280
116519
114609
1145
4893
6392
3039
673
9049
6690
10019
5194
6338
3717
5921
3077
6017
675
5189
2566
285489
54829
5078
51360
2729
368
1545
1293
6390
5956
2301
335
7941
351
659
3040
4292
185
1908
6337
5551
4914
6356
1524
4948
4204
1482
6340
8074
5290
4137
3861
5830
3858
54714
81839
19
10516
841
4976
6899
348
4352
5167
1146
595
2099
843
4724
4846
4000
1298
1188
5002
4763
64127
2153
4524
3659
1816
6928
10243
121278
859
10269
2213
345611
1234
7517
201163
3162
4359
3030
2690
64072
5328
5157
2324
1636
948
10133
8792
154
2158
1814
5961
2147
23414
8929
65217
1291
1292
1116
3596
5979
5663
3265
5309
3119
1959
2074
5788
5573
2052
3868
128178
6496
3909
5781
2668
64324
4157
4771
1302
6389
55572
84634
54716
4041
5443
1738
6908
6556
3172
7291
22954
3107
4607
5077
84059
2006
7012
8419
182
27185
1144
11200
1312
2652
7040
6833
55997
7097
3566
5621
701
7490
7249
717
2706
54903
1415
1299
1548
4481
8643
5468
2707
91942
7439
6606
5192
56997
3630
6772
51135
6794
6792
7466
84100
2617
2778
4552
79001
3431
207
1137
5080
6391
64241
30835
1134
54840
7169
79728
7299
3078
1140
5133
8313
23322
5191
3990
2645
11277
629
3872
10878
657
171023
6521
6531
2121
123016
11005
2956
2688
3557
4261
6469
4436
392255
7038
9573
3981
80184
2811
1378
1029
472
3043
2542
846
4049
2532
6323
7051
10804
9241
5172
4353
2033
6101
5071
1301
24
3048
367
7048
6622
650
8312
5156
2155
1889
3588
83990
4621
5972
50943
65125
4089
1756
7099
7399
