# Supplementary material for: Global Analysis of the Human Pathophenotypic Similarity Gene Network Merges Disease Module Components
Source: PLoS One. 2013 Feb 21;8(2):e56653. doi: 10.1371/journal.pone.0056653 (PMC3578923; doi:10.1371/journal.pone.0056653)
Supplement: Table S6 — Biomolecular interactome and PSGN sub-networks after nodal intersections. (XLS) [file pone.0056653.s009.xls]

## Sheet: PIN (nodal interesection PSGN)
Entrez GeneID 1	Entrez GeneID 2
1736	55131
1991	8565
10159	5972
5578	4968
4998	4175
274	6654
11200	6647
2956	1387
4724	4726
10102	3998
6442	6445
3861	3852
1406	10002
1499	595
6774	2908
3728	8312
4851	1272
7148	401
2002	1387
1643	25
2165	2162
6658	5080
91147	54903
861	2033
1027	25
5781	6772
1513	2261
3029	4653
5728	27030
5167	3643
6657	5080
2318	825
124590	10083
1134	1144
2130	4723
5626	8820
6496	5080
948	3655
6469	8643
4724	374291
4330	2033
6311	6310
6908	284403
4000	2010
4853	1272
4233	3082
1956	2771
6569	9368
5781	6654
5836	5236
4143	64374
3815	25
585	5108
1499	1956
6774	6927
4722	4719
2157	5627
1281	4921
242	4000
291	4792
5830	5191
367	2033
7136	7138
8805	7421
6609	427
51807	5189
22948	60
7048	94
64421	4683
6197	1387
2248	2263
355	695
2200	2006
6774	2261
472	4292
8893	5373
2159	5340
596	7157
613	7157
5828	5830
6567	7067
2192	1462
5824	5195
367	64324
596	5578
1674	1832
5925	9321
84876	1501
6262	775
64324	5914
2159	2677
5395	4436
9968	7067
4018	1991
2175	7415
367	207
23414	2625
269	268
2175	4292
326	1387
4758	5476
1410	3315
5578	2566
3621	6598
4982	7450
60	3909
4914	4803
56652	4292
4853	4653
4261	9759
1991	7039
2308	1387
374291	4728
5578	7157
269	7046
10243	23229
1540	8517
3339	351
4907	60
1991	5265
9533	8893
8792	8600
4644	79083
2147	462
5660	4093
5660	1509
10939	2821
6774	7852
8050	2033
5627	2147
1294	4313
7015	207
8313	324
4703	7273
274	1785
10479	1080
596	1374
2706	10804
7157	1718
3689	5578
3914	3909
916	919
9129	9733
5962	9368
1499	2064
367	6774
64805	2771
6392	6389
2157	5624
7157	2956
5339	1956
71	1536
4982	2335
351	9445
1292	2335
11186	7132
7704	5873
7704	1785
70	7454
5156	5159
4722	4728
4720	374291
90	7046
859	2778
6772	5159
1499	4233
7273	1410
567	925
7132	4653
6311	26128
6886	5925
2071	6908
22948	8518
3702	7454
5194	5824
7015	5578
1285	351
3913	3691
367	860
4724	4719
23385	5664
8292	590
25	695
10516	1822
4763	3265
3673	58
718	25
70	23224
653361	6853
7704	9759
6654	7535
2512	4653
5824	1029
4758	2588
164656	2335
7253	2778
51684	2736
10594	9451
6514	3651
367	1387
2072	4436
7253	2317
8050	1738
3064	8518
5578	3691
5621	5340
54949	8518
5781	5578
8517	7132
6925	1499
2022	7046
7157	5602
5664	4853
1675	5345
7157	1316
6311	7428
6598	60
8893	1967
4221	3053
3786	9132
22	2235
3758	9368
712	1280
5824	37
2147	2162
2071	1643
6310	10084
554	2778
5728	7157
2130	695
6872	595
51021	56945
2811	7450
7428	2335
7067	1387
7704	8813
3767	3759
1729	5080
1822	546
5621	1272
6755	57120
3480	3717
4089	4093
9533	7486
4018	2244
7428	4069
392255	658
1499	5308
51021	3614
3897	1272
19	57120
710	5327
5274	5340
4722	4724
8200	90
5339	3691
4729	4724
1991	3053
9076	4313
3460	3717
1280	1299
1326	958
2811	2317
1501	1499
3728	5318
4729	374291
7852	3717
4254	9820
1642	2071
4792	3717
5340	5054
2160	3082
2956	4436
71	5373
3981	4683
712	3273
2335	4653
5340	730
6774	2033
4723	4724
6774	3480
3000	2978
5345	2162
6708	6710
1991	5054
388552	84343
1909	1908
5582	846
5578	6812
2242	3717
164656	1277
51592	4089
10594	9129
1499	7048
7048	7040
4695	4719
9051	7454
3753	5578
2072	2071
861	595
472	4683
916	917
1956	2064
11200	4436
1956	355
29078	1491
6708	58
8085	4221
64374	4093
4627	7454
5160	1738
3972	2778
10594	8106
8890	1967
4792	8517
4041	8312
5395	2956
5925	7428
2033	6598
3728	2064
1499	5663
5828	5192
8085	4093
2130	4591
2771	2138
2316	3759
274	25
3717	7132
58	7157
6690	5651
7157	7443
5339	70
658	657
2130	4598
1991	7852
5925	7020
5307	5449
2771	3972
1140	5913
5795	3561
6010	6295
7045	1286
4867	2317
762	6521
919	7535
5664	351
6872	6908
5265	5657
6774	7253
55651	1736
4352	7066
1824	1829
6772	7421
1278	3674
7253	3973
5519	1080
9051	4210
6886	2623
351	3032
5925	843
930	3732
2811	2160
367	8431
5578	355
6338	6340
2934	2335
3717	5310
6736	367
5993	5994
1288	2335
2316	7428
841	1001
5578	3785
3064	7157
5261	5256
5340	5327
4036	7038
488	596
6356	7167
8048	6710
2147	2160
2242	6774
6638	9129
3064	875
1956	3717
7486	1029
9533	5373
7276	8518
3265	673
132884	4093
71	7454
1499	602
7547	2737
1967	8891
4723	374291
3973	2771
8893	8890
5160	5605
6712	58
3852	1832
2202	7078
1639	6712
9368	1811
5063	6853
472	7507
8988	26012
3050	2261
1674	5310
3930	4609
4720	4726
5092	6927
5191	5264
658	652
4771	9368
8890	8891
1280	7040
7157	8312
4914	8878
6755	5830
2072	4998
7291	2737
710	5340
7157	7020
2153	5624
1499	4089
7428	3998
5897	5896
5781	3977
5290	5159
7846	6949
1896	10913
3914	3918
207	1027
10381	4160
9051	25
8878	6622
9992	3784
5156	5155
7048	7046
5781	7852
9968	7421
1501	5664
100506658	5582
4723	4720
367	2908
3728	5310
4952	9950
1029	7428
70	60
388552	11234
176	2192
2335	1286
55806	7421
5578	1103
4729	4719
1278	3673
6654	200576
5657	2006
23385	25
2147	3053
26353	9531
6622	6620
3064	6908
2720	2588
3329	5160
6774	2623
8074	2261
23414	2033
2130	6505
10243	2743
6774	1387
5340	1356
7508	1643
3691	1308
5479	7428
1499	841
6908	2068
3767	3939
7490	7157
4137	841
2335	5310
5649	7436
7415	4292
5195	5830
1280	5310
8878	4089
6311	274
3689	3909
7421	6598
3064	207
5836	5256
1956	2065
4729	4723
4726	3757
8795	841
3852	5318
64421	472
701	675
659	4342
860	4488
4093	7337
5913	4593
1146	1134
1287	351
351	3028
1956	4233
324	6101
3728	1829
1639	8625
4286	2033
3717	3459
8301	841
4609	2956
5578	6505
2623	1053
10381	7018
7045	1277
1758	3075
388552	84062
4851	5664
5795	1956
1499	2033
3815	6772
4018	4036
2316	5664
6928	1387
7018	6452
1288	351
71	200576
4982	8600
185	183
6774	595
6927	2033
4487	6908
208	7249
1910	1908
5578	1080
60	6853
4000	5578
7415	347733
7306	7299
5925	25
2147	710
367	2308
4221	4297
351	348
4607	4627
1476	1509
762	8671
545	2956
2255	2263
3315	4792
27019	5048
860	9759
23414	2623
4729	4720
4860	7157
4359	5376
4869	55131
7080	7849
8241	1822
4143	8242
2308	3172
4281	3476
4724	4694
4726	2261
5925	6598
5604	2002
4093	60
673	5605
3329	760
11200	5236
3064	1956
5825	215
5327	3909
7486	7415
538	1356
5077	6663
54361	64840
7490	8626
5519	3717
653361	1535
641	7157
641	7486
545	4436
1909	2771
2492	2488
5087	2908
5318	1829
367	1644
3064	274
4602	1387
5781	7132
2811	2147
1536	4688
2158	2155
3172	1387
58	25
5950	6121
8892	8890
51807	4609
26353	3315
355	843
57120	1080
1285	2335
930	25
5663	841
4976	4609
4143	217
3426	718
7003	4625
5950	7276
2072	2068
5795	5159
2934	60
4093	2896
3728	1824
613	2242
6638	6908
1956	6654
4352	3717
4647	5573
1991	710
4868	7827
2071	1387
2071	1161
10456	5244
90	1387
6772	2261
5828	5824
1499	1001
6622	351
94	7046
324	8312
5092	775
1292	5825
1278	2335
7535	7305
2670	5663
1499	5795
1528	1586
2010	60
4137	6197
5468	8431
641	4436
659	1326
5925	5422
2200	1462
2908	6908
2956	4292
3339	1822
841	843
659	1410
2159	2155
5914	7337
1499	7046
999	5310
8431	5914
673	207
4853	5663
4729	4728
3064	1387
760	8671
3815	695
3426	3075
208	8115
2130	6872
659	658
3265	5290
9076	65266
6208	55131
2071	7508
6584	9368
6622	1371
1956	185
10594	1736
8029	4036
4729	4695
207	6772
8805	5241
2316	4867
7046	7138
5339	3655
207	65125
2335	1311
7124	7132
1029	7167
4869	1029
3339	7276
55835	1387
5664	841
1991	2896
3848	1832
4137	348
4729	4694
166785	4594
7273	4607
5837	5255
6310	1760
5727	50846
2157	5264
2316	675
6496	2138
1499	9368
2040	6513
472	4436
4609	7021
1509	1471
7043	2022
4297	1387
1756	70
7157	5422
2335	3082
3315	7051
1278	7450
338	4036
8517	1387
1027	595
7067	8805
3673	3339
351	25
2175	207
6455	8312
71	5339
1642	25
4137	6812
2697	5582
2022	7040
7040	4313
488	4609
11200	5521
79577	3757
4723	4694
8443	8540
4695	4728
859	5213
207	2623
3643	5578
2147	5054
2071	7157
11093	7450
6654	2065
6690	2006
1134	1145
367	5925
3460	2908
286	6521
3339	5155
595	2033
6925	4729
5340	462
4683	4436
6908	5080
6891	6890
4792	8518
6774	4233
1287	2335
2108	2109
875	4143
6311	8031
5626	5308
6663	60529
472	5830
6197	6794
7253	3717
860	8312
367	1956
5728	207
2132	23418
5156	9368
7169	7168
2908	7704
8878	7046
5071	6622
4771	7248
60	4653
1499	5664
7415	2821
4609	2033
367	2934
207	8115
472	7428
3329	8050
54840	4591
7846	5048
3818	3082
2243	3273
6310	5184
4803	5340
7157	675
1813	2771
5664	4854
1278	4653
4221	2670
7273	286
6908	602
274	3655
3689	3732
375790	1822
5578	4001
11200	1161
80781	4313
4487	5077
4137	6710
3728	324
1737	1738
27249	4548
4286	3845
100506658	7046
3897	5621
5781	3480
3753	3757
4792	825
6622	1861
2677	2158
2720	5476
1642	8450
23365	3480
7450	1277
5578	26353
4851	182
5194	5830
5624	2677
7168	7139
1828	5318
367	861
5781	5156
9968	1130
653361	60
3251	7428
712	2335
6392	6390
7157	3315
2202	1822
3561	6772
4436	1387
3897	286
3691	3912
2677	2155
5339	6708
7157	1387
2623	1387
1956	6772
4644	4609
4726	4719
7846	4609
1528	1543
4771	5830
712	715
2318	9499
348	4036
11234	84062
6772	1387
2038	3845
2243	2162
5476	3920
3897	5962
7846	6208
1406	1387
6208	6949
58	7137
4041	4093
4261	5993
5054	4036
3728	5795
5727	6469
659	392255
3858	207
367	7337
8575	5925
5781	1956
2308	5468
10128	4609
3786	3785
23418	5573
2335	3674
351	7040
4914	25
4093	5256
2033	8626
3815	3717
641	2175
5578	7137
659	410
2130	4287
2153	5627
54880	9759
3691	4233
64087	56922
2956	4683
1528	1727
7068	595
6390	6389
189	5830
5925	595
2316	5578
3480	2771
6925	8493
5925	841
2153	1991
5582	1103
2072	7507
4137	8287
11200	4683
6598	1387
2130	5578
7157	7337
7846	55131
613	4609
4722	4695
5824	6569
613	3717
5261	5836
6908	6598
8892	8891
7157	2033
1501	999
3949	338
5624	1356
7157	6598
6443	6442
10243	2617
545	4683
388552	8546
4869	6208
7507	1643
1832	1308
1822	2896
6208	6223
3655	1308
351	1509
8575	7157
1293	4313
6310	22954
3673	1293
2157	7450
3728	999
351	841
6768	3082
8074	2263
7273	4627
5604	673
6925	429
207	6310
6886	2625
23345	2010
596	9445
658	7138
8892	1967
4867	2318
367	4089
4602	2033
9968	81857
19	335
9129	26121
6261	779
2322	6452
4723	4719
3659	6772
351	2161
2068	1161
55835	1822
3689	5962
6812	5582
1991	2006
4093	5318
5781	5159
7415	4287
7050	367
9180	3717
1756	58
5781	4233
2811	2161
5824	215
1824	5318
7048	7043
30008	1822
472	7157
8291	825
7136	7140
4907	2335
7276	335
84343	84062
525	9368
5621	5818
3048	1727
392255	657
23345	4593
5781	6774
6755	1813
7415	4792
2243	3674
9839	4093
8805	2908
57449	7132
176	4313
4722	4723
5781	7010
3621	7157
1282	7045
540	7704
404672	2068
5479	1785
3753	3784
5621	348
6774	6772
2707	79813
4093	4125
8600	4792
6772	3459
2072	7508
659	657
1280	1311
4722	374291
1501	25
5087	5080
4609	6908
1282	2335
6310	478
8557	6310
4724	4728
2260	1387
2068	4436
5339	4093
4487	4488
7046	8312
4089	2737
2157	2158
2335	2192
3621	2033
2316	846
3655	3732
168667	652
658	269
3329	56922
5824	5192
5578	846
58	9562
11236	7428
6890	6892
2308	4089
1956	5159
5479	338
30008	6310
10594	26121
1282	1294
3480	9342
5631	3329
9759	8625
1642	1161
1294	3918
4723	4695
1027	7249
58	121512
5194	5192
727	732
79803	84343
5236	5837
4436	4292
3655	3912
1642	7507
5727	3549
3990	338
4018	10516
5373	27032
5578	5914
65109	54902
5781	3717
207	208
1280	3674
7486	7157
2064	2065
23365	19
100506658	4089
1822	2192
1406	2033
4297	6598
2064	3691
8031	5468
7248	5962
841	999
4322	7078
2200	4653
2317	5663
7020	2033
3845	6654
4720	4695
2316	2811
70	6521
23592	4093
5071	841
1387	3207
4089	2202
161742	3815
1285	7045
2908	5449
6452	2260
9051	1832
207	2033
8893	8892
8431	3172
5925	1053
4093	2512
5449	1387
226	4653
4137	6622
5340	3273
7490	5076
653361	207
1280	2335
5781	4352
2316	367
2064	3717
2130	1822
3265	596
3460	3459
4688	1535
1509	7038
8200	657
4694	374291
8878	2068
602	1387
1281	4653
3973	9368
207	8600
2131	2132
51592	1387
861	6901
2582	4598
5728	6794
25	3717
1282	351
596	841
8074	5251
7068	7157
80781	3791
4297	6908
4609	4292
58	4647
4703	1674
2588	5476
5314	5311
2159	5327
1499	5310
2038	286
658	8200
2308	207
7080	5914
1642	7508
367	291
4763	351
8557	7273
7704	2033
8048	4618
7846	6622
5156	6772
7157	6303
7852	6772
79813	9839
4000	4001
2147	3674
2130	183
3815	4254
5664	2317
2653	7704
7157	6794
5925	5076
3339	2896
2147	2158
5345	2160
3897	287
7148	51360
9060	7428
4695	374291
4313	7077
1499	1387
4093	90
959	958
6925	2033
5781	5979
25	6452
1639	4609
7486	472
3852	242
9992	3757
22948	7157
50846	8643
3791	2324
6340	6337
4143	5184
6010	5578
4313	2260
4692	1717
4137	5663
2737	7546
26227	25978
1956	5573
2316	2317
4089	2192
567	3077
3702	695
7137	7138
4695	4694
8878	90
2162	2335
4758	2720
1499	6927
4851	2033
1285	7399
335	338
5604	4609
7846	324
596	9531
5199	718
860	2033
3973	2778
1277	5155
1499	2308
7436	348
274	6853
2244	2243
5781	3643
128178	10913
7132	843
51021	7428
4867	261734
731	732
5230	6598
118429	1286
3815	51196
613	5781
5745	5744
641	4292
4724	4695
2316	7273
3818	2161
1642	1643
1956	999
7039	1956
5925	6908
1499	8312
285489	4593
2705	5578
5054	5327
7535	6452
1641	5048
7490	1387
1536	1535
70	23345
596	3845
7337	5241
4771	1499
4609	1832
1828	1824
94	7040
659	8200
7415	3717
2235	204
190	367
3852	3848
4137	25
659	652
7015	25
1291	3912
2071	4436
4023	4036
4487	6872
11200	545
2072	1161
2201	2006
10594	4609
7078	4313
4261	8625
25953	2027
4609	9782
4089	2335
6872	6598
23385	351
5116	5108
4729	3431
2040	471
9968	6662
7054	6622
2956	5230
7157	4436
1639	3064
5781	2261
4723	4726
5825	5264
5578	2697
5781	3459
4694	4728
641	7415
4921	1277
71	60
5213	5373
6927	1387
7067	595
6772	3717
9051	471
7253	2771
71	347733
54209	7305
472	2956
760	6521
4069	2006
5160	8050
1832	843
7124	5657
3549	8643
7507	11186
4692	7157
7046	7040
6774	3717
2157	2147
4967	1738
3791	7078
1639	7428
2492	208
90	7421
5578	7139
3673	1277
4487	1387
1441	3717
4602	1053
2130	8050
3643	3480
1291	1280
6870	6866
4547	338
367	8031
5340	3909
1991	5345
4867	27031
3973	3972
6310	1471
2243	5345
5781	2324
5925	2033
554	551
7068	90
445	2006
4054	7040
5781	3815
8313	1499
1476	7428
3791	6772
10594	6638
51684	2737
8893	8891
4647	10083
7048	4089
51021	8565
545	7507
351	5663
1956	58
1027	841
3329	3845
9368	1080
4204	6598
5159	9368
2705	2706
3265	185
3265	51196
1822	4036
1643	2068
4233	355
6443	6445
5578	1747
7157	4792
5274	5327
10456	8647
7157	959
717	718
8029	7018
7137	7139
1499	324
7291	2033
2492	7704
6772	2033
9368	1244
7046	4653
5745	9368
2200	3339
7508	7507
4722	4720
5825	2639
3691	3655
348	3949
930	6654
4729	4726
5631	51324
7253	7252
5578	58
6455	1387
2316	4000
1278	7045
3913	3655
374291	4719
3236	1387
2335	1294
6017	5959
6925	367
3914	1294
5313	4653
4000	23345
3732	2065
2811	2815
8878	658
6262	3708
7157	6908
3848	2161
1280	1298
3659	2033
7273	58
2153	2159
4089	2033
6005	6521
5621	3329
3329	217
1499	7020
7157	6638
51592	8805
8546	84062
1340	7389
6772	7132
7450	3674
55131	6949
367	8805
4018	2335
7043	7046
5627	5624
1642	2068
596	6647
652	657
4869	6949
767	3708
4089	3172
5311	5310
641	4683
30008	7157
51741	7157
4726	4695
2130	889
2821	5230
1482	6910
5159	5155
1278	351
3265	6654
5604	1956
718	3075
7273	825
2153	2147
100	2908
6712	6708
7415	10939
6622	6531
5627	2159
3689	60
5914	8805
54704	5160
3702	7046
23529	9244
3728	1832
715	710
5745	5741
2316	5663
5914	7704
3265	5604
1285	118429
2312	7428
5339	4001
23385	5663
6017	9368
4054	7043
2071	6598
653361	4688
8450	1643
4728	4719
4720	4719
6338	6337
4644	5873
7428	6223
6005	286
2033	1387
6927	6928
5660	2629
4609	274
5160	56922
4869	7157
100506658	2705
5521	7428
5962	1244
7535	25
4000	60
1278	948
718	727
94	7043
3853	1832
7454	695
2147	2677
1586	5447
84343	11234
1737	8050
6866	8518
9640	4093
717	727
4000	5925
4869	60
6774	1956
100506658	58
6866	197131
2956	2033
8517	841
5578	2670
8805	3172
7421	7704
5160	7167
7168	60
291	2908
4726	374291
7248	207
2908	6598
7276	4036
4723	4728
6774	5159
25782	22930
6314	1406
182	4854
7157	8626
4487	7157
185	3717
2064	3732
367	1499
641	472
5224	2027
6662	2033
5122	5972
5824	5825
6262	6261
1280	4322
2697	2702
4853	182
2316	9499
5087	3236
1737	56922
367	6041
2157	3998
367	595
3643	3717
2737	1387
4683	2033
7337	9820
4867	27130
6654	2260
5604	2033
404672	2071
545	7157
2934	351
2147	2243
2071	2068
6310	54902
4692	415
5994	8625
4093	2335
1528	5447
71	287
1277	4313
79803	11234
3691	6310
4722	4729
429	2033
596	5663
7849	2033
4726	4728
1499	3791
5578	1956
472	25
4609	6598
1729	5311
2243	5327
2335	1277
9451	8518
546	9759
351	2192
5631	5634
5663	999
6886	2033
1509	2335
7136	60
27089	1161
6392	6391
4609	1785
7157	25
1501	5663
930	695
8878	5795
6927	3172
7169	60
641	2956
5195	5191
7020	324
3265	11186
4297	3053
859	3643
1294	1277
3064	10133
3032	3030
2033	5080
6774	1441
613	25
4089	7046
701	8546
545	3791
1737	5160
1639	6103
5339	1308
3728	1828
1130	1822
3265	3643
730	727
6338	1272
5925	4609
2934	58
2318	6445
5925	860
5781	3791
4089	1387
1297	1311
4914	5781
613	2071
5824	8504
4722	4726
7704	2623
5230	4436
6622	2002
4093	56652
4286	5080
4089	3702
658	7046
5795	4233
5781	1441
4726	4694
3767	6833
401	1387
71	2934
6872	5925
596	3708
54880	6611
7157	3172
5194	5191
472	6794
916	7535
2002	2033
3329	5422
7048	2022
10456	5311
1639	5048
4683	4292
367	9733
388552	79803
8292	4593
3295	60
2308	2538
5091	9533
79803	84062
7080	1387
207	1326
1585	1584
2736	7546
2147	5624
3265	5155
7421	1387
7248	7249
6891	6892
4722	4694
4694	4719
5395	4292
1991	1441
2200	2201
2130	4089
79083	5873
2157	2159
4322	2161
7507	4436
70	3315
9241	652
1499	5318
3791	1785
1499	6299
5657	3689
5993	8625
2064	6654
2316	1813
2244	2192
1956	3732
7157	2908
1822	1760
4720	4728
5339	841
64324	7067
1956	268
81839	3732
859	8291
55505	1736
65266	6559
4089	8021
22948	58
212	8803
5914	10002
841	355
4869	7846
2908	1387
859	1956
51807	51684
471	7428
5192	5830
2132	3172
6774	5979
123016	5108
6662	1387
27030	4292
7428	718
2192	2006
4724	4720
2248	2261
5925	7704
90	2022
3815	5578
3930	4001
1121	7879
100506658	5578
2694	8029
5159	3717
58	7170
948	1277
5194	5195
4720	4694
3339	2192
351	6620
4609	1387
2248	2260
7253	2335
2668	5979
1499	999
4851	5663
7170	60
1832	5318
11200	472
207	7249
4595	2956
8050	56922
7039	2064
1280	7045
4023	7436
1967	1387
2130	1387
5728	367
7045	2335
4869	6103
6663	5080
30062	5080
5578	695
6774	5156
7168	7138
7168	5311
7137	5311
7167	5230
6872	7157
5824	5376
5345	5340
1959	6663
4137	60
948	3674
6872	4297
1029	4609
4771	2064
5663	4854
71	7415

## Sheet: MGN (nodal interesection PSGN)
Entrez GeneID 1	Entrez GeneID 2
10157	158
10157	36
10157	38
10157	4524
10157	5053
10157	56922
10157	64087
10157	6566
10157	7299
10157	7498
10165	10560
10165	11136
10165	1373
10165	189
10165	224
10165	226
10165	229
10165	3081
10165	3242
10165	383
10165	3939
10165	435
10165	445
10165	5009
10165	5053
10165	5172
10165	6519
10165	6821
10165	80704
10165	9380
10166	1373
10166	435
10166	445
10166	5009
10166	84693
10312	226
10312	229
10312	23545
10312	26503
10312	2990
10312	3073
10312	3074
10312	51181
10312	525
10555	1491
10555	216
10555	226
10555	229
10555	3939
10555	4023
10555	501
10555	5172
10555	55163
10555	6821
10555	80025
10555	8398
10555	875
10558	427
10560	11136
10560	1738
10560	189
10560	216
10560	224
10560	226
10560	229
10560	2653
10560	2731
10560	275
10560	501
10560	5053
10560	55163
10560	6519
10560	6821
10560	7299
10560	80704
10560	9380
10682	1593
10682	1629
10682	1717
10682	1718
10682	19
10682	23600
10682	2639
10682	3030
10682	3032
10682	3295
10682	4598
10682	50814
10682	549
10682	593
10682	594
10682	6309
10682	6718
10682	7054
10682	80270
10682	9420
10841	131669
10841	34
10841	35
10841	383
10841	5409
11136	1738
11136	189
11136	226
11136	229
11136	2653
11136	2731
11136	275
11136	38
11136	55163
11136	6519
11136	80704
11136	9380
126328	374291
126328	4694
126328	4695
126328	4719
126328	4720
126328	4722
126328	4723
126328	4724
126328	4726
126328	4728
126328	4729
126328	51
131669	1374
131669	1376
131669	1593
131669	34
131669	35
131669	383
131669	4598
131669	50814
131669	5092
131669	5409
131669	6309
131669	788
131669	9227
1340	1374
1340	1376
1340	1629
1340	2108
1340	2109
1340	2110
1340	2571
1340	27089
1340	29958
1340	3028
1340	3030
1340	3032
1340	34
1340	35
1340	4143
1340	4548
1340	4967
1340	5625
1340	593
1340	594
1340	6389
1340	6390
1340	6391
1340	6392
1340	6647
1340	7381
1340	7384
1340	788
1340	7915
1340	8050
1340	84701
1371	210
1371	212
1371	2235
1371	23169
1371	3145
1371	5498
1371	7389
1371	7390
1373	216
1373	224
1373	226
1373	229
1373	383
1373	3939
1373	435
1373	445
1373	5009
1373	501
1373	5092
1373	7054
1373	80025
1374	1376
1374	1738
1374	2108
1374	2109
1374	2110
1374	2653
1374	27089
1374	2731
1374	275
1374	34
1374	35
1374	4967
1374	6389
1374	6390
1374	6391
1374	6392
1374	7381
1374	7384
1374	788
1374	8050
1374	84701
1376	1738
1376	2108
1376	2109
1376	2110
1376	2571
1376	2653
1376	27089
1376	2731
1376	275
1376	3081
1376	34
1376	35
1376	4967
1376	6389
1376	6390
1376	6391
1376	6392
1376	7381
1376	7384
1376	788
1376	8050
1376	84701
1491	1644
1491	3028
1491	3030
1491	3032
1491	36
1491	38
1491	3939
1491	4143
1491	6821
1491	7054
1491	875
158	4128
158	471
158	56922
158	64087
158	6821
158	7498
1593	1629
1593	1717
1593	1718
1593	23600
1593	2639
1593	3030
1593	3032
1593	3295
1593	383
1593	4594
1593	4598
1593	50814
1593	593
1593	594
1593	6309
1593	6718
1593	7054
1593	80270
1629	1717
1629	1718
1629	23600
1629	3028
1629	3030
1629	3032
1629	3295
1629	34
1629	36
1629	3712
1629	4594
1629	4598
1629	50814
1629	549
1629	56922
1629	593
1629	594
1629	6309
1629	64087
1629	6718
1629	7915
1629	84693
1629	84701
1629	875
1644	3712
1644	38
1644	4023
1644	4128
1644	5409
1644	7299
1644	875
1717	1718
1717	19
1717	23600
1717	3030
1717	3032
1717	3295
1717	4594
1717	4598
1717	50814
1717	5244
1717	5409
1717	549
1717	593
1717	594
1717	6309
1717	6718
1717	80270
1717	9420
1718	19
1718	23600
1718	3295
1718	3712
1718	4598
1718	50814
1718	549
1718	593
1718	594
1718	6309
1718	6718
1718	80270
1718	84693
1718	9420
1719	1890
1719	7372
1737	5160
1737	8050
1738	189
1738	2653
1738	2731
1738	275
1738	3081
1738	3242
1738	34
1738	35
1738	4967
1738	5053
1738	6519
1738	788
1738	8050
1738	80704
1738	9380
189	216
189	224
189	226
189	229
189	2653
189	2731
189	275
189	501
189	5053
189	51181
189	55163
189	6519
189	80704
189	9380
1890	7372
19	3931
19	4598
19	50814
19	5244
19	6309
210	212
210	2235
210	23169
210	3145
210	5498
210	7389
210	7390
2108	2109
2108	2110
2108	2571
2108	27089
2108	29958
2108	34
2108	35
2108	4143
2108	4548
2108	4967
2108	6389
2108	6390
2108	6391
2108	6392
2108	6647
2108	7381
2108	7384
2108	788
2108	8050
2108	84701
2109	2110
2109	2571
2109	27089
2109	29958
2109	34
2109	35
2109	4143
2109	4548
2109	4967
2109	6389
2109	6390
2109	6391
2109	6392
2109	6647
2109	7381
2109	7384
2109	788
2109	8050
2109	84701
2110	2571
2110	27089
2110	29958
2110	34
2110	35
2110	4143
2110	4524
2110	4548
2110	4967
2110	5625
2110	6389
2110	6390
2110	6391
2110	6392
2110	6647
2110	7381
2110	7384
2110	788
2110	7915
2110	8050
2110	84701
212	2235
212	23169
212	3145
212	5498
212	7389
212	7390
216	224
216	226
216	229
216	383
216	3939
216	4023
216	435
216	445
216	5009
216	501
216	51181
216	55163
216	7054
216	80025
216	80704
216	9380
217	4830
2184	3081
2184	3242
2184	5053
2184	56922
2184	64087
2235	23169
2235	3145
2235	5498
2235	7389
2235	7390
224	226
224	229
224	383
224	435
224	445
224	4830
224	5009
224	501
224	55163
224	7054
224	80025
224	80704
224	9380
226	229
226	23545
226	26503
226	2653
226	2731
226	275
226	2990
226	3073
226	3074
226	3939
226	435
226	445
226	5009
226	501
226	5053
226	51181
226	5172
226	525
226	55163
226	6519
226	6821
226	80025
226	80704
226	9380
229	23545
229	26503
229	2653
229	2731
229	275
229	2990
229	3073
229	3074
229	3939
229	435
229	445
229	5009
229	501
229	5053
229	51181
229	5172
229	525
229	55163
229	6519
229	6821
229	80025
229	80704
229	9380
23169	3145
23169	5498
23169	7389
23169	7390
23545	26503
23545	2990
23545	3073
23545	3074
23545	51181
23545	525
23600	3295
23600	4594
23600	4598
23600	50814
23600	593
23600	594
23600	6309
23600	6718
23600	80270
2539	34
2539	35
2539	4594
2571	27089
2571	4594
2571	6389
2571	6390
2571	6391
2571	6392
2571	7381
2571	7384
2571	788
2571	7915
2571	84701
2639	3028
2639	3030
2639	3032
2639	3033
2639	4598
2639	50814
2639	5409
2639	549
2639	6309
2639	6821
2639	7054
2639	7306
2639	84693
26503	2990
26503	3073
26503	3074
26503	5053
26503	51181
26503	525
2653	2731
2653	275
2653	3081
2653	3242
2653	34
2653	35
2653	6519
2653	788
2653	80704
2653	9380
27089	29958
27089	34
27089	35
27089	4143
27089	4524
27089	4548
27089	4967
27089	5625
27089	6389
27089	6390
27089	6391
27089	6392
27089	6647
27089	7381
27089	7384
27089	788
27089	7915
27089	8050
27089	84701
27232	4143
27232	4524
27232	4548
2731	275
2731	3081
2731	3242
2731	34
2731	35
2731	6519
2731	788
2731	80704
2731	9380
275	3081
275	3242
275	34
275	35
275	6519
275	788
275	80704
275	9380
2936	5053
2936	8398
2936	84693
2990	3073
2990	3074
2990	5053
2990	51181
2990	525
29958	4143
29958	4524
29958	4548
29958	7381
29958	7384
29958	84701
3028	3030
3028	3032
3028	3033
3028	36
3028	38
3028	549
3028	593
3028	594
3028	7054
3028	7306
3028	84693
3028	84701
3028	875
3030	3032
3030	3033
3030	3295
3030	36
3030	4128
3030	4598
3030	4967
3030	50814
3030	549
3030	593
3030	594
3030	6309
3030	6718
3030	7054
3030	7306
3030	8050
3030	84693
3030	84701
3032	3033
3032	3295
3032	36
3032	4128
3032	4598
3032	4967
3032	50814
3032	549
3032	593
3032	594
3032	6309
3032	6718
3032	7054
3032	7306
3032	8050
3032	84693
3032	84701
3033	4598
3033	4967
3033	50814
3033	5409
3033	549
3033	6309
3033	6821
3033	7054
3033	7306
3033	8050
3033	84693
3073	3074
3073	5053
3073	51181
3073	525
3074	5053
3074	51181
3074	525
3081	3242
3081	5053
3081	5172
3081	5244
3081	6566
3081	788
3081	8659
3145	5498
3145	7389
3145	7390
3242	5053
3242	5092
3242	5172
3242	6566
3242	8659
3295	383
3295	4598
3295	50814
3295	5860
3295	593
3295	594
3295	6309
3295	6718
3295	6785
3295	7054
3295	80270
3295	9420
34	35
34	38
34	593
34	594
34	7381
34	7384
34	788
34	84701
35	38
35	383
35	7381
35	7384
35	788
35	84701
36	38
36	4594
36	593
36	594
36	84693
36	875
3712	549
3712	56922
3712	593
3712	594
3712	64087
374291	4694
374291	4695
374291	4719
374291	4720
374291	4722
374291	4723
374291	4724
374291	4726
374291	4728
374291	4729
374291	51
38	383
38	3939
38	51181
38	6519
38	8659
38	875
383	3939
383	4023
383	435
383	445
383	4598
383	5009
383	501
383	50814
383	5092
383	51181
383	6309
383	7054
383	80270
3931	5244
3939	435
3939	445
3939	5009
3939	501
3939	51181
3939	5172
3939	6566
3939	6821
3939	8659
3939	875
4023	501
4128	471
4128	5409
4128	55163
4128	56922
4128	64087
4128	7054
4128	7299
4128	84693
4143	4524
4143	4548
4143	7381
4143	7384
4143	84701
435	445
435	5009
435	501
435	5092
435	7054
435	80025
445	5009
445	501
445	5092
445	7054
445	80025
4524	4548
4524	7381
4524	7384
4548	7381
4548	7384
4548	84701
4594	593
4594	594
4594	6718
4594	7915
4598	50814
4598	593
4598	594
4598	6309
4598	6718
4598	7054
4598	80270
4598	9420
4694	4695
4694	4719
4694	4720
4694	4722
4694	4723
4694	4724
4694	4726
4694	4728
4694	4729
4694	51
4695	4719
4695	4720
4695	4722
4695	4723
4695	4724
4695	4726
4695	4728
4695	4729
4695	51
471	6821
471	7498
4719	4720
4719	4722
4719	4723
4719	4724
4719	4726
4719	4728
4719	4729
4719	51
4720	4722
4720	4723
4720	4724
4720	4726
4720	4728
4720	4729
4720	51
4722	4723
4722	4724
4722	4726
4722	4728
4722	4729
4722	51
4723	4724
4723	4726
4723	4728
4723	4729
4723	51
4724	4726
4724	4728
4724	4729
4724	51
4726	4728
4726	4729
4726	51
4728	4729
4728	51
4729	51
4967	6389
4967	6390
4967	6391
4967	6392
4967	7381
4967	7384
4967	788
4967	8050
4967	84701
5009	501
5009	5092
5009	7054
5009	80025
5009	80270
501	51181
501	55163
501	7054
501	80025
501	80704
501	9380
5053	51181
5053	5172
5053	5244
5053	56922
5053	64087
5053	7299
5053	7372
5053	7498
5053	80704
5053	9380
50814	593
50814	594
50814	6309
50814	6718
50814	7054
50814	80270
50814	9420
5092	5860
5092	7054
5092	84693
51	6389
51	6390
51	6391
51	6392
51181	5172
51181	525
51181	8659
51181	875
51181	9380
5160	8050
5172	6821
5172	8659
5244	6309
5244	6566
5409	7299
5409	84693
549	56922
549	593
549	594
549	6309
549	64087
5498	7389
5498	7390
55163	6519
55163	7054
55163	80704
55163	9380
5625	7381
5625	7384
5625	84701
56922	593
56922	594
56922	64087
56922	7299
5860	7054
5860	84693
593	594
593	6309
593	64087
593	6718
593	7915
593	84693
593	84701
593	875
594	6309
594	64087
594	6718
594	7915
594	84693
594	84701
594	875
6309	6718
6309	7054
6309	80270
6309	9420
6389	6390
6389	6391
6389	6392
6389	7381
6389	7384
6389	788
6389	7915
6389	8050
6389	84701
6390	6391
6390	6392
6390	7381
6390	7384
6390	788
6390	7915
6390	8050
6390	84701
6391	6392
6391	7381
6391	7384
6391	788
6391	7915
6391	8050
6391	84701
6392	7381
6392	7384
6392	788
6392	7915
6392	8050
6392	84701
64087	7299
6519	80704
6519	9380
6647	7381
6647	7384
6647	84701
6718	80270
6821	80704
6821	875
6821	9380
7054	7306
7054	84693
7054	875
7299	7306
7299	80704
7381	7384
7381	788
7381	7915
7381	8050
7381	84701
7384	788
7384	7915
7384	8050
7384	84701
7389	7390
788	8050
788	84701
7915	84701
8050	84701
80704	9380
8398	84693

## Sheet: FSGN (nodal interesection PSGN)
Entrez GeneID 1	Entrez GeneID 2
23590	57107
10786	116085
389434	7173
85366	487
25953	3029
80704	10560
7040	7043
7048	269
7043	2022
7054	538
7080	170302
23414	1482
23322	2736
3291	1585
3295	3032
2132	2131
2155	2677
2161	3818
11232	2617
2263	2255
2263	8626
2255	79068
2255	6469
2235	2395
120892	1910
2294	657
2294	6469
3460	3459
8322	54982
8322	4041
8313	5582
2022	5054
3549	5076
3549	6469
3549	89781
175	4125
183	185
93986	64220
116519	344
100	1716
100	7498
8029	4036
4967	6299
4982	324
3082	4233
56922	64087
120227	1593
10159	5972
3141	5009
3199	1959
538	540
6891	6892
6891	6890
6891	567
6886	2623
585	123016
4629	8557
594	593
596	6469
401	89884
411	2588
445	1373
54361	668
336	5468
344	4023
1630	2736
1585	1584
1594	8805
4860	5631
5979	5076
5979	1910
367	668
351	5663
215	5825
4838	657
4838	6469
1482	7490
1482	27130
1491	875
1491	2571
1499	652
1499	6469
5836	5631
291	2697
5860	2643
959	958
4292	675
4292	641
56172	5167
5727	5122
8600	8792
8626	6591
2303	5155
259266	641
779	668
2736	2737
2668	1140
602	1991
617	54902
8803	7390
2643	659
2625	7849
641	7486
652	64220
652	6496
652	6469
652	7849
1029	7421
64240	64241
7390	7389
5106	5105
5159	5155
5159	5156
5159	5157
5172	6528
7306	7299
5189	5194
7253	7849
5076	7849
5096	5095
6469	6662
6389	6390
1909	1910
25836	64220
10939	93986
10939	2743
38	3030
38	3155
94	90
94	7046
90	7046
128178	1896
85366	4607
7040	7048
7040	50943
7048	50943
7080	2737
7020	265
23405	8575
23414	7490
83605	1499
83605	652
91147	4869
3251	100
3251	4907
9759	183
9759	1482
9759	6262
50943	3561
50943	916
50943	6469
2201	2200
2263	2296
2263	1499
2263	5744
2263	2737
2263	652
2263	6469
50964	8313
2255	2296
2255	3082
2255	4920
2255	5950
2255	4838
2255	5744
2255	8626
2255	2737
120892	596
120892	6928
120892	5076
11005	2071
11005	2068
8195	55212
8195	583
8195	585
79644	6716
8322	4693
8312	4838
8313	1499
92579	2538
8398	6901
2072	2073
2071	2068
2055	3766
2055	291
9365	2990
3630	3643
3651	2645
3728	1545
3712	56922
3712	64087
3717	3172
91647	54968
183	1636
183	1535
183	64699
9241	5979
9241	5076
93986	2743
3766	291
3766	5663
9180	3977
3815	4254
22845	1798
55212	585
4968	4595
4976	4747
8074	1594
8074	7421
3032	3030
3077	4891
3074	3073
3074	2760
3074	57502
3073	2760
3913	652
3972	2488
3172	4771
538	2395
583	585
8985	5352
8985	5351
4693	4041
596	4254
596	1910
1756	6299
54361	367
54361	64220
54361	5241
54361	5076
54361	6662
4593	351
4593	4038
472	5897
472	5896
2799	875
2799	4166
336	335
348	6647
1636	1535
1594	7421
4851	6469
4864	1201
5950	8626
367	5241
351	7473
351	4038
226	229
4838	54880
6928	652
6928	5076
6910	1482
55670	8504
5897	5896
4747	5048
5837	5836
291	2705
268	658
4221	2395
8626	652
5625	8659
2705	2697
773	1103
2668	2625
8803	7389
675	641
2625	7291
2629	6609
652	7490
652	5159
652	5156
9990	59341
5352	5351
6010	6295
7490	5159
7490	7849
5156	5157
5053	5092
6440	6439
6523	6524
326625	6948
326625	2694
25836	5925
25836	2625
285590	7124
37	207
38	7306
38	5019
70	58
70	8557
58	8557
58	779
94	652
94	168667
94	4066
10786	92579
10786	2538
10786	2542
85366	7138
7068	3074
7068	551
7068	57502
7040	596
7040	6469
7048	916
7048	8546
7054	2625
7084	1716
7080	2255
7038	1080
7038	5172
7038	6528
7124	336
7124	335
7124	355
7138	487
7157	9401
7157	641
3236	6905
3251	5631
2138	8575
2138	6299
2147	3717
2147	948
2161	2160
2161	5340
2161	5054
2160	3818
2160	5340
11181	3074
11181	2760
11181	2548
50943	10159
2248	2255
2263	4967
2263	538
2263	27089
2263	6662
2255	7476
2235	1371
2296	2303
9657	84059
9657	7399
9657	27031
79644	6718
8322	1392
8312	5728
8312	6496
8313	4436
2022	1499
2022	147372
2022	7476
9451	8890
9451	8891
9451	8893
92579	2542
3549	2064
3549	652
3549	1029
2072	2956
2072	4292
2072	4436
2074	1643
2074	5429
2068	1636
3593	1029
2064	652
2064	1029
9401	641
9401	7486
2033	1387
84059	7399
84059	27031
9368	7249
9368	7291
3630	183
3630	185
3630	2645
3717	6774
10585	8813
10560	113235
10516	948
189	5313
9241	5950
9241	6910
93986	1813
3861	4747
3815	4291
3815	2322
3818	5340
100	4968
100	4595
100	4860
100	5631
8029	6948
8029	2694
4967	538
4967	27089
149461	1180
3949	7436
3155	7306
3172	2308
2956	4436
538	1471
538	2625
538	27089
1813	64220
551	760
1896	1499
6812	627
4609	4089
4627	2623
4647	6647
51422	8518
595	207
595	1956
596	5897
596	89781
1718	8540
1718	7498
435	445
435	162417
435	5009
445	162417
445	5009
6716	6718
336	348
335	348
344	2760
4935	4948
4935	7299
4948	7299
1643	5429
4891	27032
4851	1499
4851	2625
4851	7291
65018	2668
65018	5071
4864	5468
5950	6910
5950	7380
367	1050
207	208
207	1956
4838	2736
6948	2694
6928	1499
6928	2719
6928	6299
6926	652
6916	773
1535	617
1535	54902
1535	5155
4763	6622
4747	7476
1499	999
1499	7480
1499	7476
5836	2539
5824	8504
51119	4041
269	268
269	657
269	4093
268	657
268	4093
4291	2322
2539	5631
2538	2542
4254	89781
8540	7498
1376	1374
8575	6299
1356	2395
8626	7380
889	2625
2303	5054
4128	6531
1203	1201
1203	5538
1203	54982
1201	5538
1201	54982
1201	2581
1201	7915
2741	2743
162417	5009
773	779
773	7200
760	6005
2736	6469
2737	5076
2668	5076
2668	7849
5538	54982
1122	1121
8805	7421
675	2625
675	1029
2625	1029
669	5224
657	4093
652	1029
652	6299
652	168667
1080	7439
1080	5172
1080	6528
2592	2584
2592	2582
2592	5236
2584	2582
2584	5236
2582	5236
2581	7915
8890	8891
8890	8893
8891	8893
5468	51099
7490	5155
5256	5255
5244	6513
7415	5071
26227	7915
7399	27031
5155	5157
7249	7291
6389	6392
6389	6391
6392	6390
6392	6391
6390	6391
6662	6584
1908	1910
6514	6513
10913	1896
10913	999
10913	6469
25836	6926
25836	6910
25836	1499
23592	90
23529	50943
10841	131669
35	34
35	37
35	2110
34	37
34	2110
37	2110
25	472
70	4629
58	4629
94	5728
10683	4851
85366	1760
85366	859
7067	7480
7040	5728
7048	3702
7046	9247
7046	6899
7043	4891
7084	56652
7080	64220
7080	4054
7038	2492
7038	4036
7015	26277
7124	1594
7124	1499
7124	652
7124	7480
7137	7139
7148	10516
7148	538
7148	4629
23414	2263
23414	54361
23345	23224
23322	5048
23224	5048
3242	2184
3242	3081
3251	3614
3251	8833
2155	2159
2155	2158
2159	2158
2161	718
11136	1497
11136	6519
2184	3081
11181	3938
11181	2717
11181	6476
10133	9950
50943	3593
50943	5621
50943	6622
2201	1277
2201	7480
2248	2737
2263	2261
2263	2260
2263	2294
2263	93986
2263	1482
2261	2260
2261	9365
2261	8074
2255	367
2255	207
2255	64220
2255	4054
2255	1956
120892	4534
2294	8626
8195	3476
11078	2934
3476	583
3476	585
3476	2308
8443	8540
8443	1103
8443	5191
9573	4838
9573	4089
9573	6469
9562	669
9562	5224
79644	22845
79644	1798
79644	8813
3508	2068
3508	56652
8312	9241
8313	1513
8313	1277
8313	4330
2022	54345
2022	4891
9496	1499
9496	7476
9469	348
9469	4747
3549	8842
2071	9401
2071	641
2071	7486
2068	56652
2033	859
3614	8833
9365	8074
9368	5795
9368	1080
9368	7809
9368	6622
3630	5167
3659	596
3728	1499
3728	999
91647	229
3702	8546
10558	2629
153201	9152
10516	538
10516	4629
189	1719
185	1956
9241	5914
9241	2736
9241	2668
9241	2625
9247	6899
3766	2737
3766	5076
116519	336
116519	335
116519	51099
3818	718
100	5896
100	602
100	652
22845	8813
8085	367
3913	1285
3913	1286
3913	4358
3913	7490
3949	472
3949	338
3949	348
3949	5538
3938	6476
3981	2322
3110	445
3110	64220
9049	7466
10159	1636
538	4629
1813	1392
1813	2316
1813	170302
1813	6622
6891	8546
6892	6890
585	4669
585	6101
585	7840
551	596
551	2395
551	5071
567	8546
1896	999
1896	6469
4669	6101
4669	7840
596	760
590	29958
56652	6683
6785	7287
401	429
429	6439
445	64220
1798	8813
1760	487
1760	859
4548	1491
4548	875
54361	359
54361	1499
54361	773
54361	7490
54361	6299
4534	5728
4534	80224
487	859
487	259266
488	6262
472	338
472	348
472	5538
54345	4851
54345	1499
54345	7476
338	348
338	5538
336	344
336	64240
336	64241
335	344
335	64240
335	64241
344	51099
348	4747
348	5538
1636	5972
1594	4851
4891	57192
5979	7490
367	1289
367	6469
351	64221
229	54968
5914	1311
5925	5728
1513	1277
1513	4330
4838	4089
6928	2625
6928	80184
6928	7849
6926	6910
6926	1499
6910	1499
5896	652
1497	6519
1499	6299
1499	6662
999	6469
5741	1392
5741	7421
2492	4036
1392	7421
8540	5191
5795	6622
8626	1277
8626	1278
8626	1041
8626	7486
5634	5631
5649	170302
2304	2301
5625	2746
4158	4160
1292	1291
1292	1277
1292	1278
1291	1277
1291	1278
1285	1286
1285	4358
1285	7490
1286	4358
1286	7490
1277	1278
1277	4330
1277	1041
1277	7480
1278	1041
2395	5071
2717	2720
4436	7508
2625	652
2625	5076
652	5155
652	5076
1080	7809
4351	5373
4358	7490
64220	4054
5468	6469
7490	5076
7381	7384
7369	5076
7369	7849
80184	5076
80184	7849
6299	6662
4089	6469
6101	7840
35	38
35	3155
35	7306
19	336
19	335
19	348
19	5468
728294	2033
728294	841
30009	958
7040	120892
7040	4688
7040	4763
7040	627
7043	7080
7043	4688
7043	668
7054	5071
23175	338
23169	10559
7080	8312
7080	6870
7080	551
7080	668
7020	54880
23095	4747
23095	6687
7124	5167
23405	4771
23405	1499
100506658	1789
100506658	4548
100506658	27232
83706	100
3291	1535
3291	5155
3295	2623
3295	6662
3251	471
2147	348
2147	5155
8106	2733
2263	120892
2263	1813
50964	4041
2255	6926
2255	55636
2255	5728
2255	652
79738	8195
79738	582
79738	585
120892	84062
120892	4967
120892	1813
120892	4763
120892	627
120892	170302
2296	3064
2294	78987
2294	55612
2294	652
2294	5076
8195	582
3480	595
3480	383
8322	1545
8322	5159
8322	5156
8312	8313
8312	657
8313	4041
2022	1471
2022	5340
2022	5167
8301	344
11285	1471
11285	1289
11285	1281
3549	4935
3549	4948
3549	7299
2072	64421
3593	183
3593	2688
3561	2625
2033	10159
2033	1636
2033	5972
2033	841
50814	80270
84062	1813
3690	5468
9368	10568
9368	9247
9368	8074
9368	142680
9368	6927
9368	5167
3630	5468
10568	9247
10568	8074
10568	142680
10568	5167
10555	51099
174	3972
174	2488
183	336
183	335
183	348
183	208
183	2688
185	336
185	335
185	348
9241	657
9247	8074
9247	142680
9247	5167
93986	652
116519	2760
100	4907
78987	657
78987	652
4967	170302
8074	142680
8074	1543
8074	5167
3032	549
3030	549
3064	2303
3913	4692
3913	2303
56922	686
56922	5096
56922	5095
56922	5091
3981	54840
3973	54361
6872	6928
6872	6927
6872	1482
6870	551
538	4891
538	5071
540	4891
545	472
545	1535
545	4487
545	1029
1813	477
1813	2668
6899	1302
6899	2304
6899	2301
582	585
4602	1789
4629	652
56623	4952
4693	1545
4693	5159
4693	5156
595	383
429	4838
1789	54880
1789	27232
1756	5076
1756	1959
54361	1585
54361	1584
54361	4488
54361	7421
471	2643
472	1535
472	4487
472	1029
142680	5167
338	948
338	4481
338	4023
344	348
344	7436
348	7436
348	5155
4935	89781
4948	89781
1585	1535
1585	5155
1594	1543
4891	6948
4891	2694
5950	6926
5950	55636
5950	64220
383	1201
367	652
367	7421
355	207
359	652
359	5076
359	7849
207	5728
207	859
207	7249
212	54583
217	224
226	5213
229	5213
5914	861
6928	6927
6928	1482
6927	1482
6926	55636
6926	8626
6926	64220
1543	1535
1543	7421
1543	6647
1545	4041
1545	5159
1545	5156
1535	6647
1491	2729
4763	627
4771	1499
1471	4261
1471	1289
1471	1281
1471	5340
4747	6687
1499	5159
1499	5155
55636	8626
55636	64220
275	2653
275	29958
5831	8659
242	59344
265	54880
5860	5805
5860	5092
5860	6697
948	4481
948	4023
959	889
959	2625
958	889
958	2625
5805	2643
5805	5092
5805	6697
5728	1956
8557	652
8600	5604
8600	4160
8600	760
8600	4054
1302	2304
1302	2301
8626	64220
859	7249
875	2729
2303	652
2303	7490
64087	5096
64087	5095
4160	760
4160	4054
1289	1281
718	710
1201	2629
2746	2571
2705	2706
2706	2697
2717	2548
760	4054
2737	6469
54880	64324
2668	6622
4481	4023
4487	1029
1144	1134
1137	1140
686	5095
686	5091
2643	5092
2643	6697
2653	29958
2625	5071
2623	6662
657	652
2548	6476
7535	6469
7490	5156
5241	7421
4041	5159
4041	5156
5155	5156
7299	89781
5076	6469
5076	1959
5092	6697
5095	5091
25836	7040
25836	23175
25836	7124
25836	7157
25836	7480
10939	773
23590	3643
22	55640
22	28982
22	113235
19	196527
19	84062
19	10577
19	3172
19	388552
58	9759
90	6899
90	1482
90	2625
7068	7067
7067	6872
7040	23175
7040	7080
7040	7157
7040	445
7040	383
7040	652
7046	4851
7046	1482
7046	1499
7046	2625
7054	1644
7054	2643
7054	5053
7054	5092
7054	6622
7054	6531
23175	7157
7080	183
7080	185
7080	1636
7080	1535
83959	8671
7124	2263
7124	2255
7124	3082
7124	291
7124	999
7124	7421
7124	5155
7124	6469
7148	3549
7157	7436
7157	6513
23405	9639
23405	8443
23405	2068
23405	4763
23405	5376
23405	6647
23414	2625
100506658	4143
83706	6812
83706	2623
10083	4647
10083	65217
10083	124590
10083	64072
10083	7401
3236	3110
3236	2736
3236	2737
3239	2263
3239	652
3251	2625
3251	5158
3251	7849
2155	9368
2155	5795
2155	6622
11141	2294
11141	6622
3207	4838
3207	657
3207	5076
2161	2395
2161	5122
9759	779
9759	1029
11186	2255
50943	3549
50943	2064
50943	652
50943	1029
2203	5213
2263	4851
2263	6926
2263	259266
2263	5155
2255	999
2255	5155
2294	2022
2294	4609
2294	6910
2294	1482
2294	147372
2294	4089
2294	6622
9639	4763
9639	6647
8195	84059
8195	1301
8443	2068
8443	5376
2010	8313
2022	1482
2022	859
2022	2717
9451	4000
3549	3561
3549	10516
3549	100
3549	538
3549	4629
3549	2736
2072	2071
2072	2068
2071	2073
2073	2068
2068	5376
2055	3073
2055	3064
2055	2395
2055	2643
2055	2548
2055	6505
2064	6469
3561	100
3561	2736
3561	6469
3614	5158
84059	1301
84062	388552
3690	2303
3690	5054
3630	6870
3643	57107
10560	2348
10568	229
10568	6476
10568	6569
153201	54716
158	4907
183	1813
183	2668
185	1636
185	1535
185	5538
3778	3766
3778	1585
3778	7380
3791	5795
3791	7248
93986	773
3766	3064
3766	1585
3766	7380
3766	6505
100	5728
100	2736
100	6469
4982	652
4982	80326
9152	54716
3073	2395
3073	2643
3073	2548
3064	291
3064	6505
3082	999
3931	336
3931	335
3931	348
3990	344
3990	348
3110	2736
3110	2737
3155	5019
10165	6505
3172	5538
3159	57379
10243	4338
10243	4337
6872	7480
1822	1543
1822	1545
6899	1482
6899	2625
551	57502
6812	2623
4609	657
4609	7490
4609	5159
4609	6469
4625	4627
4647	65217
4647	124590
4647	64072
4647	7401
596	627
596	652
65217	124590
65217	64072
65217	7401
445	383
445	652
6794	324
6794	1027
487	6647
142680	6569
336	1991
324	1027
51251	4907
1644	2643
1644	6622
1644	6531
1630	7473
1585	359
1585	7466
1585	7380
4851	8626
124590	64072
124590	7401
383	652
355	291
359	7466
207	948
208	948
229	6476
5914	916
5914	2625
4838	5076
6926	2737
1543	1545
55640	28982
55640	113235
1482	147372
1482	2625
4763	652
4763	6647
1499	2625
1499	5076
1499	7849
291	6505
5860	5053
916	2625
959	4261
5805	5053
4221	5468
5795	7248
1373	5009
859	2717
859	5538
859	64699
64072	7401
2303	5159
64087	5091
2348	113235
4143	27232
2395	2643
2395	2548
2395	5122
5664	5663
2743	773
2717	2629
2717	2581
2737	652
2695	6622
5538	1956
8833	5158
28982	113235
2643	2548
2643	5053
2643	6622
2643	6531
2629	2581
657	4089
657	5076
652	80326
4338	4337
64220	7291
1029	6469
7490	6469
7436	6513
5264	5194
5159	6469
5155	6469
5053	6697
5096	5091
6622	6531
326625	55163
10841	471
19	344
10786	10568
10786	142680
10786	291
129880	8195
129880	583
129880	585
10683	2147
10683	9241
10683	4763
30062	190
30062	27089
81031	6514
81031	6513
30009	50943
80704	11136
80704	1497
80704	6519
80781	3209
80781	8985
7078	2934
7078	596
7078	590
7078	429
7078	875
7040	7046
7040	8312
7040	51422
7040	1373
7040	4488
7040	2629
7040	657
7040	4089
7040	7291
7040	6609
7046	7043
7046	657
7046	652
7046	4089
7043	4488
7043	657
7043	652
7043	4089
7043	7291
7080	6910
7020	249
7020	1277
7038	23405
7038	9451
7015	7157
7015	11200
7015	545
7015	472
7015	1029
7124	50943
7124	383
7124	207
7124	208
7124	7200
7137	183
7137	1813
7157	11200
7157	2956
7157	545
7157	472
7157	4436
7157	1029
23405	9451
3295	190
3295	3028
3295	3033
3295	3030
2147	9241
2147	4763
3209	8985
11136	10560
2184	435
2184	383
11200	545
11200	472
11200	1029
50943	54361
50943	958
11093	1636
11093	1200
11093	4322
2263	7473
2255	182
2255	3815
2255	4618
2255	429
2255	7473
79738	6647
2296	54345
2296	147372
2294	64220
10020	56052
10020	2582
8419	7476
3480	3651
3480	3643
8312	51422
8312	324
8312	59341
8313	9451
8313	1301
9451	1301
3549	54361
2074	3593
2074	596
2074	4436
2074	7508
2073	602
2073	675
2073	5429
2073	7486
2068	2038
2068	3766
2068	3050
2068	2539
2068	5354
8379	4627
2055	4747
2055	6647
3593	596
3593	5621
3593	4436
3593	7508
2064	54361
2038	3050
2038	2539
11315	1813
11315	2668
11315	5071
11315	6622
9368	3172
9368	5962
9368	6569
9380	189
3630	6890
3630	710
3651	3643
3728	652
3717	5578
10560	1497
10560	6519
182	3815
182	429
182	4851
182	4792
182	64170
182	8626
183	10159
183	5972
9241	4763
9247	6569
190	2623
190	27089
190	6662
3791	2322
3791	2324
3791	5159
3791	5156
3766	5354
3860	1499
3860	652
3860	2548
3860	6469
3848	710
3815	429
3815	8626
10436	55651
4967	10157
4967	501
4967	594
4967	593
4967	1738
4967	2639
4967	5160
4968	1716
4976	9927
8074	54880
8074	4054
8074	6662
8074	6569
3028	3033
3028	3032
3028	3030
3033	3032
3033	3030
3050	2539
3074	2717
3074	8869
3074	2629
3074	54982
3074	2581
3073	2717
3073	8869
3073	2629
3073	54982
3073	2581
3064	5048
3981	3159
3973	8546
3973	2625
3973	7849
10157	501
10157	1738
10157	2639
3172	5962
6870	6866
2956	4292
2956	5395
2956	7374
1813	55636
1813	5071
6890	710
582	6647
585	6647
501	1738
501	2639
6834	1355
6834	617
6834	9997
2934	596
2934	590
2934	429
2934	875
4602	4221
4602	54880
4609	54361
4609	5076
51422	1376
51422	1374
51422	788
594	5160
596	590
596	401
596	429
596	487
596	351
596	875
596	5663
596	773
596	4436
596	7508
596	7466
596	27089
590	429
590	875
593	5160
116085	291
1727	5447
1716	4595
401	773
401	27089
429	8626
429	875
435	383
1789	4221
1789	57379
1756	657
1738	2639
54361	6928
54361	2719
54361	2625
54361	652
54361	1029
54361	4089
54361	6469
54361	7849
4534	4952
487	477
487	351
487	5663
487	7466
54345	2303
54345	147372
344	64240
344	64241
324	59341
1636	1200
1636	4322
1630	351
4952	5728
4851	6926
4851	4792
4851	64170
4851	652
4851	6662
5950	6121
383	1373
383	7200
351	7466
203	204
207	1482
207	1272
208	1482
208	1374
208	1272
208	7291
6928	7490
6926	6662
1482	1272
4792	64170
4747	6647
1499	2548
275	2731
5831	5625
249	265
249	1277
249	54880
269	2736
268	2736
265	1277
54583	64175
4292	4436
4292	5395
4292	7374
1376	788
57338	5311
1374	788
1374	7291
1373	652
1355	617
1355	9997
875	26227
2322	2324
2322	5159
2322	5156
2324	5159
2324	5156
2303	147372
1277	54880
197131	7249
197131	7248
5663	7466
710	5054
1200	4322
2760	2717
2760	8869
2760	2629
2760	54982
2760	2581
773	27089
2719	2625
2719	652
2719	7490
2719	5076
2731	2653
2731	29958
2736	657
2736	4093
4488	652
4488	7291
54880	4054
54880	6662
2668	5071
4436	5395
4436	7374
602	675
602	5429
602	7486
8869	54982
617	9997
675	5429
675	7486
2623	7490
2623	7849
2623	6528
657	1959
652	2548
652	4089
652	7291
652	6662
9990	6559
9990	6557
2548	6469
5429	7486
5395	7374
7490	6528
7473	6469
7381	27089
7384	27089
6299	170302
4089	5076
4054	6662
5167	6569
7249	7248
5071	6622
7849	6528
6559	6557
25836	3199
25836	6899
25836	2303
23590	27235
23590	57017
35	7915
38	7915
19	4792
10743	583
10743	5727
10743	2395
10743	6311
10683	4792
81031	83959
81031	10559
81031	26503
30009	3329
7068	8200
7068	3207
7068	3549
7068	2737
7040	3476
7040	348
7040	916
7051	2162
7051	2038
7051	9333
23169	9469
23169	55343
7084	1890
7080	50846
7080	190
7080	3028
7080	1813
7080	595
7080	429
7080	5156
7038	1733
7038	2304
7038	2301
7038	2625
7038	7849
83959	10559
83959	26503
7124	1617
7124	8600
7124	718
7124	8792
7124	8893
7124	29914
23405	3913
23224	259266
91147	55755
3291	183
3291	185
3242	5860
3242	5053
3242	5092
3248	5468
8200	3207
8200	3549
8200	2737
50846	190
50846	3028
50846	595
50846	5156
2147	5345
2147	5340
2147	5054
11141	1813
11141	2771
3207	3549
3207	2737
2161	1718
2162	2038
2162	9333
2160	1718
2160	5054
8292	4128
8292	7915
2184	5860
2184	5053
2184	5092
50943	3329
50943	2956
50943	4292
50943	4436
50943	641
2255	9241
2255	3849
2255	55612
2255	2736
2255	1050
2255	5468
2296	657
2294	1499
9639	3913
11005	4851
11005	207
11005	5664
11005	5663
11005	7480
8195	8481
3329	3593
3329	959
3329	958
10020	1798
10021	54714
10021	1261
3476	2629
3476	6609
3480	585
3480	675
8481	583
8481	585
8481	6101
2010	10269
2010	4000
2010	5048
8312	1280
8312	652
8313	9401
8313	5925
3549	3728
3549	1545
3549	2737
2072	26277
3593	3717
3593	5897
3593	959
3593	1130
3593	602
3593	6469
9401	5925
9401	1499
2033	3643
2033	1499
2038	9333
11315	9368
84059	4647
84059	6647
3630	50506
3643	1499
3728	4851
3728	1482
3728	2625
3728	64220
3728	7490
3728	7291
3717	183
3717	2688
10559	55343
10559	26503
183	3913
183	1585
183	4763
183	50506
183	8893
183	7380
183	5155
185	1585
185	50506
185	7380
185	5155
185	64699
9241	367
9241	8626
9241	1280
[truncated: 28,319 more rows]

## Sheet: PSGN (nodal interesection PIN)
Entrez GeneID 1	Entrez GeneID 2
2308	5081
4093	659
336	3949
336	2053
3949	2053
843	355
1535	1536
94	2022
4688	653361
2132	2131
4688	1535
4688	1536
1535	653361
1536	653361
4292	4436
5627	5624
3753	3757
3753	9992
3757	9992
7249	7248
6392	6391
6100	6101
6100	3614
6101	3614
7067	50506
4261	8625
4261	5994
4261	5993
8625	5994
8625	5993
5994	5993
3784	2702
10913	128178
5311	5310
6392	6390
6708	6710
208	3172
602	613
55505	55651
5795	8313
5795	27030
5795	2033
8313	27030
8313	2033
27030	2033
3868	3853
1122	1121
6891	6892
6891	6890
6892	6890
2956	5395
5897	5896
7508	1643
8792	8878
596	602
6340	6338
3785	3786
1290	1289
60529	4488
2120	4291
2120	6455
2120	2322
2120	8021
2120	8028
2120	4026
2120	23365
2120	4869
2120	8301
2120	8833
4291	6455
4291	2322
4291	8021
4291	8028
4291	4026
4291	23365
4291	4869
4291	8301
4291	8833
6455	2322
6455	8021
6455	8028
6455	4026
6455	23365
6455	4869
6455	8301
6455	8833
2322	8021
2322	8028
2322	4026
2322	23365
2322	4869
2322	8301
2322	8833
8021	8028
8021	4026
8021	23365
8021	4869
8021	8301
8021	8833
8028	4026
8028	23365
8028	4869
8028	8301
8028	8833
4026	23365
4026	4869
4026	8301
4026	8833
23365	4869
23365	8301
23365	8833
4869	8301
4869	8833
8301	8833
3868	3857
1293	1291
6391	54949
3691	3655
5506	5468
4692	6638
3918	3914
7124	1909
8438	83990
8438	8493
8438	9821
83990	8493
83990	9821
8493	9821
2158	2157
55755	55835
732	1675
1813	8910
1277	1278
1292	1293
1292	1291
6620	6622
3753	287
3757	287
9992	287
57379	7374
10243	4338
3758	6557
2153	2161
3784	3753
3784	3757
3784	9992
8200	658
959	958
54209	7305
10516	30008
6017	5959
3753	6331
3757	6331
6331	9992
6331	287
25	602
1144	1134
3852	103
79803	84062
79803	11234
79803	388552
79803	84343
84062	11234
84062	388552
84062	84343
11234	388552
11234	84343
388552	84343
9368	6569
6392	54949
861	602
2956	4292
2956	4436
4292	5395
5395	4436
11231	5589
2109	2108
3098	669
462	5627
6390	6391
5795	207
207	8313
207	27030
207	2033
10083	7399
3426	1675
6340	6337
6338	6337
79784	71
79784	1687
71	1687
81693	8029
2539	3098
2539	669
8287	6795
6870	6866
6870	26012
6866	26012
7136	7140
7015	26277
8287	50511
1643	5429
3784	287
7048	7046
3784	6331
2161	3998
3918	3909
3914	3909
2155	3998
595	7428
2261	2255
8890	8892
8890	8891
8890	8893
8890	1967
8892	8891
8892	8893
8892	1967
8891	8893
8891	1967
8893	1967
7066	4352
7508	5429
3857	3848
4359	1959
5961	5959
11236	4968
6795	3972
6005	6710
1824	3753
1824	3757
1824	9992
7507	1643
3315	26353
57716	1959
2811	2815
25	613
4089	657
4000	10269
5318	3753
5318	3757
5318	9992
6710	286
64421	3981
7045	200576
10483	146059
6005	6708
4233	8312
338	336
338	3949
338	2053
6390	7428
2153	3998
2263	2255
7508	7507
1824	5318
6708	286
269	268
1829	7043
4593	1140
51360	6303
6833	2645
5376	4359
1729	79784
1729	71
1729	1687
5605	5604
1824	6331
462	5624
1829	5318
1145	1140
3858	3848
6017	5961
2120	4297
4291	4297
4297	6455
4297	2322
4297	8021
4297	8028
4297	4026
4297	23365
4297	4869
4297	8301
4297	8833
5192	5194
5192	5830
5194	5830
7078	5961
8504	5195
8504	5824
5195	5824
8291	8557
731	732
5605	673
5604	673
3845	673
5376	57716
1300	4322
2743	9152
1824	7043
7157	1029
5345	2157
3845	5605
3845	5604
3691	3918
3691	3914
8200	3549
4297	613
1896	10913
1896	128178
8504	5192
8504	5194
8504	5830
5192	5195
5192	5824
5194	5195
5194	5824
5195	5830
5830	5824
4653	1545
6010	5959
3075	1675
4771	4330
2720	2588
7066	3717
4703	58
57716	9516
9132	5962
9132	64699
9132	2070
5962	64699
5962	2070
64699	2070
183	1636
2242	5914
1285	1286
56997	57017
1290	1277
4593	1145
1308	3918
1308	3914
4629	4851
5189	5192
5189	5194
5189	5830
51371	3849
7873	1029
4609	8115
5627	3053
2120	613
4291	613
6455	613
2322	613
8021	613
8028	613
4026	613
23365	613
4869	613
8301	613
613	8833
9132	3082
9132	51168
3082	5962
3082	64699
3082	2070
5962	51168
51168	64699
51168	2070
2155	2161
7078	7439
1373	5009
1289	1277
5913	285489
5634	5631
3674	2811
6927	3172
5664	8864
6392	7428
56623	51259
3674	2815
7873	6690
2147	5054
3082	51168
8504	5189
5189	5195
5189	5824
7067	7253
3659	2064
5795	675
8313	675
27030	675
675	2033
3868	3848
5795	7157
57716	4359
7157	8313
7157	27030
7157	2033
51422	6331
6833	3767
4609	596
6663	1910
1824	1829
5578	1029
1406	1121
958	57379
2157	3998
445	5009
6331	2702
4914	4803
5376	1959
1316	4595
3767	2645
3000	6121
4287	6311
3674	2159
4647	7399
9516	1959
5318	287
731	1675
5825	5828
1824	287
10516	2006
3032	3030
6654	7249
3674	7450
4137	5663
7039	5578
183	185
185	1636
1311	4148
5318	6331
7043	3753
7043	3757
7043	9992
596	613
2147	2155
2155	5054
7078	24
5345	2158
7873	7157
4041	8322
4233	1499
7157	324
4602	613
613	3195
613	5087
2157	2161
3426	3075
2120	4170
2120	4066
2120	602
4291	4170
4291	4066
4291	602
6455	4170
6455	4066
6455	602
4170	2322
4170	8021
4170	8028
4170	4026
4170	23365
4170	4869
4170	4066
4170	602
4170	8301
4170	8833
2322	4066
2322	602
8021	4066
8021	602
8028	4066
8028	602
4026	4066
4026	602
23365	4066
23365	602
4869	4066
4869	602
4066	602
4066	8301
4066	8833
602	8301
602	8833
5318	7043
2243	4069
7167	3098
7167	669
1298	1299
5795	324
324	8313
324	27030
324	2033
64421	5897
64421	5896
7507	5429
8312	1499
2539	2821
6005	286
3717	4352
675	1029
2147	3998
3998	5054
7043	8048
435	5009
79784	9132
79784	5962
79784	64699
79784	2070
11078	9132
11078	5962
11078	64699
11078	2070
71	9132
71	5962
71	64699
71	2070
1687	9132
1687	5962
1687	64699
1687	2070
5290	1499
8287	3972
2263	7291
2120	861
4291	861
6455	861
861	2322
861	8021
861	8028
861	4026
861	23365
861	4869
861	8301
861	8833
6886	8115
2263	2261
1829	3753
1829	3757
1829	9992
7043	6331
7873	79577
6654	118429
1829	51422
582	583
582	585
582	84100
582	123016
583	585
583	84100
583	123016
585	84100
585	123016
84100	123016
958	7374
79784	3082
79784	51168
11078	3082
11078	51168
71	3082
71	51168
1687	3082
1687	51168
6654	7248
2120	5159
4291	5159
6455	5159
4170	5159
2322	5159
8021	5159
8028	5159
4026	5159
23365	5159
4869	5159
4066	5159
5159	602
5159	8301
5159	8833
1829	8048
4286	7299
1308	3909
4148	1280
5318	3784
2796	6658
4254	103
4292	1029
4436	1029
2160	5742
5742	7450
2731	2653
2539	7167
6005	2040
435	445
50846	6736
10083	51168
5626	6658
7157	675
2153	2159
4297	4602
4297	3195
4297	5087
1302	1280
675	79577
3549	658
948	3673
5376	9516
3691	3909
7381	27089
7381	54902
27089	54902
7450	64805
1406	5961
8200	9241
7077	8438
7077	83990
7077	8493
7077	9821
7169	7136
7169	7140
4148	4322
89884	6658
1829	6331
1121	6102
6005	6521
9380	189
5224	5837
4292	2308
4292	5081
2308	4436
4436	5081
6390	23095
5795	5290
5290	8313
5290	27030
5290	2033
7051	242
6708	2038
23414	1482
1824	3784
462	3053
1675	5199
183	5972
1636	5972
324	8312
1643	2068
7157	207
3730	1630
7067	7173
3209	658
7157	8312
2159	2162
6710	6521
7067	7080
6710	2038
595	7873
7507	2068
3848	2707
5345	5742
1300	4148
2159	2157
7051	3849
2308	5077
5077	5081
4170	613
4066	613
582	8195
583	8195
585	8195
8195	84100
8195	123016
1718	6654
1406	10594
7157	1499
8988	3315
207	675
2157	2165
9516	4359
1300	3549
8200	2192
7173	50506
1908	1910
2157	5742
2157	7450
2956	2308
2956	5081
5395	2308
5395	5081
2161	3818
10397	9516
7450	2815
7490	675
6017	6010
2916	6295
6295	5959
51422	287
3798	6687
3849	3848
861	613
6340	1585
6338	1585
8048	2771
1103	1145
3858	3849
3691	1308
2896	5663
7168	7139
9129	5961
5318	6262
324	6654
1373	445
6928	3172
7508	2068
2120	4609
4291	4609
4609	6455
4609	4170
4609	2322
4609	8021
4609	8028
4609	4026
4609	23365
4609	4869
4609	4066
4609	5159
4609	602
4609	8301
4609	8833
26121	762
5290	207
6103	6102
2263	2260
2120	4342
4291	4342
6455	4342
2322	4342
8021	4342
8028	4342
4026	4342
23365	4342
4869	4342
8301	4342
8833	4342
2006	30008
5314	27031
79784	11078
11078	71
11078	1687
2153	2155
5795	2308
5795	5081
2308	8313
2308	27030
2308	2033
8313	5081
27030	5081
2033	5081
6559	6557
185	5972
8022	6658
5159	613
4609	861
3717	54583
1729	9132
1729	5962
1729	64699
1729	2070
1630	392255
6708	6521
2539	226
8438	207
83990	207
8493	207
9821	207
6870	84634
6866	84634
84634	26012
7003	23418
6591	1908
5345	2165
2165	5742
6326	1137
4286	6591
51371	3848
7249	4330
335	4069
4089	2022
7827	51196
7043	51422
6399	1280
3758	6559
8438	1029
83990	1029
8493	1029
9821	1029
10804	6303
7048	4851
9129	6100
9129	6101
9129	3614
10558	7879
5795	1029
8313	1029
27030	1029
2033	1029
2153	2815
2158	7450
10083	4647
7046	4851
4297	4170
4297	4066
4297	602
959	57379
4204	7337
1311	1300
2702	287
6591	5077
1729	3082
1729	51168
4221	7873
2746	6566
324	1499
3674	5742
3861	3852
5224	3939
4297	861
477	773
6399	4148
5741	846
6295	9129
324	207
2978	83394
7067	7252
51422	3753
51422	3757
51422	9992
4724	4723
5224	5236
8292	1145
208	6927
3674	64805
11186	1326
11186	5519
11186	1956
1326	5519
1326	1956
5519	1956
5961	6100
5961	6101
5961	3614
1406	5959
2147	2161
2161	5054
3791	5578
4148	3549
9533	6949
7003	1122
1387	1630
596	25
50506	7253
6208	212
7043	3784
91647	54968
7078	1001
2160	7450
4607	6331
94	4089
5624	3053
1184	6569
8200	3209
64324	1028
7248	4330
5327	3273
4602	3195
4602	5087
5155	4330
3195	5087
1145	1144
1145	1134
56997	54840
54840	57017
4297	5159
116085	7369
5742	64805
7439	5956
2159	7450
29078	4719
29078	4694
29078	79133
29078	25915
29078	4729
29078	4726
29078	4720
4719	4694
4719	79133
4719	25915
4719	4729
4719	4726
4719	4720
4694	79133
4694	25915
4694	4729
4694	4726
4694	4720
79133	25915
79133	4729
79133	4726
79133	4720
25915	4729
25915	4726
25915	4720
4729	4726
4729	4720
4726	4720
1300	1280
2645	3172
51371	3858
4292	4609
4609	4436
8287	367
6770	190
6736	207
2201	4851
6017	64218
1406	9129
4233	7157
401	10381
11236	6927
4968	6927
596	861
8675	2778
4254	3852
6473	3549
1828	9733
3798	6683
860	1513
6017	10002
7337	8864
8291	9499
999	5290
5318	8048
1824	51422
6017	7078
2157	2160
7450	2811
57716	7879
2192	9241
4644	5873
4233	324
5189	5828
121512	1959
4882	3549
23418	1122
5345	2160
1406	64218
2243	335
9516	26353
83394	9129
1829	3784
404672	2068
3784	8048
3674	2162
6768	6303
4204	8864
5959	64218
6392	23095
1829	287
7043	287
8048	287
2157	2677
6390	5979
486	6559
2040	6521
2956	4609
4609	5395
207	1029
1280	4322
9132	5456
5962	5456
64699	5456
2070	5456
5290	324
999	207
1373	435
3098	226
226	669
51422	3784
595	3791
3753	8048
3757	8048
8048	9992
3315	81857
27032	1041
56623	54806
6794	7873
7157	5290
9368	1184
6687	6683
7043	70
10594	9129
4148	1298
57716	121512
78987	4093
3858	27032
336	4023
4023	3949
4023	2053
5290	8312
375790	285489
11155	9499
5318	51422
2158	5742
10594	6100
10594	6101
10594	3614
4292	5795
4292	8313
4292	27030
4292	2033
5795	4436
4436	8313
4436	27030
4436	2033
6591	1910
582	22954
583	22954
585	22954
22954	84100
22954	123016
121512	9516
6331	8048
3239	2192
404672	2071
6010	6100
6010	6101
6010	3614
2896	25978
2159	2161
65266	6340
65266	6338
4593	5913
3708	10939
7846	5048
2159	2677
2539	286
3082	5456
51168	5456
1406	6100
1406	6101
1406	3614
7003	1462
4292	8438
4292	83990
4292	8493
4292	9821
8438	4436
83990	4436
8493	4436
9821	4436
7476	3549
7879	9516
7015	1736
116085	5631
2120	4602
2120	2242
2120	5914
2120	3195
2120	5087
4291	4602
4291	2242
4291	5914
4291	3195
4291	5087
4602	6455
4602	2322
4602	8021
4602	8028
4602	4026
4602	23365
4602	4869
4602	8301
4602	8833
6455	2242
6455	5914
6455	3195
6455	5087
2242	2322
2242	8021
2242	8028
2242	4026
2242	23365
2242	4869
2242	8301
2242	8833
2322	5914
2322	3195
2322	5087
8021	5914
8021	3195
8021	5087
8028	5914
8028	3195
8028	5087
4026	5914
4026	3195
4026	5087
23365	5914
23365	3195
23365	5087
4869	5914
4869	3195
4869	5087
8301	5914
8301	3195
8301	5087
5914	8833
8833	3195
8833	5087
7066	5159
594	1629
5741	140803
3766	6559
286	6521
8287	3077
3674	2160
207	1499
4548	27249
1828	2707
999	8438
999	83990
999	8493
999	9821
1785	9516
7879	9927
3791	7428
8292	1140
4618	1785
8200	7476
2160	2811
2071	2068
3728	3753
3728	3757
3728	9992
1643	5578
7508	5578
1829	70
2120	8115
4291	8115
6455	8115
8115	4170
8115	2322
8115	8021
8115	8028
8115	4026
8115	23365
8115	4869
8115	4066
8115	602
8115	8301
8115	8833
3857	2707
2162	2160
9321	1280
5236	5837
1121	6103
1406	6102
4625	7273
7879	23095
1140	5913
324	1029
6658	1027
930	1675
2155	2157
5159	4352
1736	55505
1736	55651
2160	2165
5264	5191
7450	3998
4292	324
324	4436
70	6331
1828	3857
2202	23418
4867	261734
8287	2796
1301	1280
5742	2811
1729	11078
1311	1280
9241	3549
7157	8438
7157	83990
7157	8493
7157	9821
51422	2702
348	351
2317	1280
5244	8647
7476	658
4976	5956
4286	5077
9516	81857
65266	65125
5961	64218
2736	6658
8048	2702
1145	5913
6399	1297
2308	207
207	5081
2324	54345
2160	2677
2978	200576
1311	1298
930	5897
930	5896
5256	5836
3798	3329
4695	374291
4695	4728
4695	4722
1311	4322
374291	4728
374291	4722
4728	4722
2120	1029
4291	1029
6455	1029
2322	1029
2308	1029
8021	1029
8028	1029
4026	1029
23365	1029
4869	1029
8301	1029
8833	1029
1029	5081
1280	4921
4297	4609
2068	5429
4297	4342
3299	2703
9227	5959
2147	2153
2153	5054
3098	286
669	286
3717	5159
1717	8864
4148	1297
2896	4137
7873	7428
5224	5255
5663	25978
6010	5961
7849	50506
10483	286
3858	2707
554	1585
7003	2703
2120	3717
4291	3717
3717	6455
3717	2322
3717	8021
3717	8028
3717	4026
3717	23365
3717	4869
3717	8301
3717	8833
486	10686
1146	1144
1146	1134
6017	24
959	7374
51259	54806
161742	6654
8030	23405
8031	23405
5108	23405
23405	8805
23405	9950
23405	51592
8115	5159
4292	7157
7157	4436
4233	5290
1122	6102
5313	286
4609	5925
8438	1499
83990	1499
8493	1499
9821	1499
3659	1316
3659	4595
5578	5429
2162	7450
1441	613
1410	11155
22954	8195
3848	27032
26121	24
24	762
9129	6102
5727	2736
79083	5873
7879	81857
1311	3549
2158	2165
5546	675
6654	4763
596	8115
9516	8898
8287	1080
1410	8291
10083	9132
10083	5962
10083	64699
10083	2070
7879	1959
5345	7450
3849	9076
7173	23405
2316	2317
8647	1244
1122	1462
8988	26353
2162	2677
3315	7879
3778	1476
1280	3549
5313	2539
6654	4771
26353	81857
78987	659
7490	6736
8292	1103
182	23414
8195	54903
26504	5959
2908	1586
2162	8287
51422	8048
24	10002
3791	2324
9227	5961
2153	7450
10083	3082
5318	70
6392	5979
7547	27031
1103	1140
2157	2162
4653	10133
6658	8820
8557	2273
9129	1121
6795	1080
5621	6908
7439	10002
4625	2273
1311	6399
2202	10002
8419	2703
7879	4359
999	1316
999	4595
1316	2064
4595	2064
2160	64805
57716	26353
1545	5080
1585	6557
582	54903
583	54903
585	54903
84100	54903
123016	54903
83394	5961
8115	613
29078	4724
4719	4724
4694	4724
79133	4724
25915	4724
4729	4724
4724	4726
4724	4720
5795	6736
6736	8313
6736	27030
6736	2033
121512	4359
23418	1462
4221	6654
959	355
4851	2006
3753	775
3757	775
775	9992
8292	4593
57716	10397
5376	121512
6795	50511
6795	57120
775	287
6100	6102
6102	6101
6102	3614
2192	6299
7381	617
27089	617
617	54902
8643	51684
8643	6598
8030	8031
8030	5108
8030	8805
8030	9950
8030	51592
8031	5108
8031	8805
8031	9950
8031	51592
5108	8805
5108	9950
5108	51592
51684	6598
8805	9950
8805	51592
9950	51592
3815	6654
6795	367
2821	3098
2821	669
3708	6712
4593	1103
10594	1121
6017	9227
51422	70
7454	2811
2771	6262
2159	2811
5805	2643
3674	4627
5313	3098
5313	669
6017	7439
24	64218
2192	658
5727	6654
2158	2161
4297	1991
57716	3315
2312	50615
4261	695
4647	51168
8625	695
5994	695
5993	695
2120	596
4291	596
596	6455
596	4170
596	2322
596	8021
596	8028
596	4026
596	23365
596	4869
596	4066
596	8301
596	8833
5236	3939
29078	4723
4719	4723
4694	4723
79133	4723
25915	4723
4729	4723
4723	4726
4723	4720
2643	5860
2159	3998
6708	2040
2335	675
6314	6310
5376	8898
1406	1122
6772	3460
6772	3459
6772	3593
3460	3459
3460	3593
3459	3593
2159	2815
6310	6311
6473	8200
2158	2677
7067	8085
6473	7476
6017	6295
1829	2771
7043	2771
2159	2160
2956	1029
5395	1029
91147	56623
4292	207
4436	207
6017	6100
6017	6101
6017	3614
79784	5456
11078	5456
71	5456
1687	5456
3674	7454
7078	10002
6755	1027
7080	50506
1289	1281
5578	2071
1406	6295
2120	1991
4291	1991
4221	1027
6455	1991
2322	1991
8021	1991
8028	1991
4026	1991
23365	1991
4869	1991
8301	1991
8833	1991
57716	8898
4297	8115
2158	2160
2202	1462
5376	7879
1280	2588
3815	5156
1311	4882
7045	1296
1959	8898
2159	2158
70	85366
1462	6102
958	3431
7168	70
7050	5727
1311	1297
9129	5959
4297	2242
4297	5914
5345	2162
208	6928
4607	70
7003	6102
121512	26353
3939	5837
6710	2040
8287	641
2308	7157
7157	5081
7507	5578
3561	5897
3561	5896
55755	259266
55835	259266
6663	1908
930	7372
6295	6100
6295	6101
6295	3614
8438	324
324	83990
324	8493
324	9821
6496	7050
2162	2165
3655	3918
3655	3914
732	3426
1282	9129
2705	9516
4137	25978
10594	6295
3784	2771
2308	4763
4763	5081
5376	26353
8557	9499
7439	1122
3674	2153
10594	2202
1300	4882
1144	1140
1134	1140
2771	287
1861	55145
675	1028
9380	6519
83394	1121
4607	51422
204	1991
843	100
2743	10243
9152	10243
1278	5479
4627	2815
2308	7249
7249	5081
5376	10397
5313	6005
6295	1121
4860	355
7490	1586
596	5159
4359	8898
3753	2771
3757	2771
2771	9992
6768	10804
1410	9499
1371	3145
1586	3972
1281	7148
958	355
4286	4935
861	4170
861	4066
2263	2316
6473	4882
2165	7010
8200	57560
176	1280
79577	1029
1290	1281
7067	23405
24	5961
23405	50506
5657	3075
2317	4921
5521	5582
4607	7043
23095	7428
2242	613
613	5914
613	4342
2811	83706
8200	4882
5318	3728
5290	8438
5290	83990
5290	8493
5290	9821
3785	2566
1908	5077
103	7306
103	6591
6794	657
140803	6559
2120	3815
4291	3815
6455	3815
2322	3815
3815	8021
3815	8028
3815	4026
3815	23365
3815	4869
3815	8301
3815	8833
2317	3549
10397	4359
8048	6262
64421	3561
5376	3315
2260	2316
5308	1545
2263	2737
2192	7476
54209	5663
5663	7305
3728	6331
4254	51371
6768	3849
57338	5621
5626	89884
2120	7157
4291	7157
6455	7157
2322	7157
7157	8021
7157	8028
7157	4026
7157	23365
7157	4869
7157	8301
7157	8833
8200	2316
6295	5961
6295	6102
701	675
3673	2815
1824	8048
103	55612
116085	5634
8504	5828
846	140803
1122	6103
5195	5828
5824	5828
5795	701
701	8313
701	27030
701	2033
1828	3868
5578	2068
7439	24
10002	5961
11200	2308
11200	5081
9562	23405
7046	2200
8600	760
3861	3918
3861	3914
9733	2707
2201	2200
10083	124590
26353	1959
6870	3973
6866	3973
3973	26012
3651	6928
6295	64218
9095	6505
3786	2566
4148	9451
3659	5290
3758	1585
1410	1674
6010	7439
10594	5961
9227	64218
7428	54583
6770	1584
4607	2702
5255	3939
7068	7253
2261	4882
7399	51168
100	355
6768	55806
355	204
2165	7450
1280	9451
843	4860
1829	4607
1736	26277
10913	4487
4487	128178
8291	2318
5728	5578
1300	4921
2147	2157
2157	5054
7439	9129
1280	3930
176	6399
3549	4322
1406	1462
2317	4882
9129	6103
2160	2815
190	9095
5192	5828
5194	5828
5830	5828
81693	2694
8029	2694
861	25
5959	6100
5959	6101
5959	3614
1896	4487
3717	861
6356	2312
6356	50615
2308	7248
7248	5081
5795	5546
5546	8313
5546	27030
5546	2033
2539	6708
861	5159
7879	26353
4286	1908
3209	7476
2153	2160
2316	3549
4000	5506
81704	2312
861	64805
10397	1959
4627	1287
176	4322
7879	121512
2263	5447
2261	3549
3674	2165
5116	3549
930	695
1121	1462
959	843
5345	2677
1280	4882
10397	8898
103	1908
208	2645
25814	6310
9733	3857
843	5657
2916	6102
1001	5818
5727	1540
7490	3972
50506	7252
1828	51371
5313	10483
8200	2317
8565	81857
2192	2316
6690	5967
100	4860
3265	5578
959	3702
5649	259266
2771	2702
8504	5825
5195	5825
5825	5824
4644	79083
7048	2200
3673	2811
10483	3098
10483	669
5213	286
5255	5236
10913	5818
128178	5818
1896	8626
10083	79784
10083	11078
10083	71
10083	1687
2956	861
5395	861
3673	7450
925	3561
100	204
2956	7249
2147	2165
2147	2244
2165	5054
5395	7249
2244	5054
58	1145
8795	3621
9927	81857
50846	5795
50846	8313
50846	27030
50846	2033
4297	596
26353	8898
5742	861
3674	861
6768	51360
2165	2677
6891	54507
6892	54507
6890	54507
1811	6340
1811	6338
3868	2707
595	79577
10133	1545
3981	3561
1103	1144
1103	1134
4609	613
2316	1280
8200	1280
3239	7476
2261	1280
3239	2316
3239	3209
1406	6103
7078	64218
4644	103
121512	8898
5255	5837
100	64421
4625	8557
1829	2702
1828	3853
5795	1499
8313	1499
27030	1499
2033	1499
2153	2811
2308	701
701	5081
3315	1959
2705	26353
10594	6102
56652	5428
1406	6010
5192	5825
5194	5825
5830	5825
10397	121512
2162	2815
2737	6658
2260	2317
4148	4921
2811	64805
3728	287
6010	6295
999	1499
3913	51196
11236	675
4968	675
2263	8626
6010	10002
176	4148
6442	9499
2158	2162
4286	7306
8565	2617
176	1300
57716	9927
10002	6100
10002	6101
10002	3614
7454	355
2261	2316
3972	3973
1301	2316
959	3431
3673	861
5795	7490
7490	8313
7490	27030
7490	2033
2260	5447
7476	9241
4000	5468
6390	3791
4148	59341
2038	286
176	59341
8626	4487
2317	6662
2539	10483
5573	9049
4920	2737
1406	6017
351	1471
6295	6103
4593	1144
4593	1134
25836	7020
5156	6654
8557	7273
925	5897
925	5896
2308	324
324	5081
5345	2159
4653	7003
6496	6469
1144	5913
1134	5913
6833	208
6833	3172
6794	4089
6770	1586
4170	1029
4066	1029
[truncated: 13,551 more rows]

## Sheet: PSGN (nodal interesection MGN)
Entrez GeneID 1	Entrez GeneID 2
216	217
6392	6391
6392	6390
2110	2109
2110	2108
2109	2108
6390	6391
1373	5009
445	5009
3032	3030
11136	6519
435	5009
23600	6718
2731	2653
2731	275
2653	275
435	445
7381	27089
5625	8659
9380	189
80270	6718
23600	80270
1373	445
2539	226
4724	4723
4719	4694
4719	126328
4719	4729
4719	4726
4719	4720
4694	126328
4694	4729
4694	4726
4694	4720
126328	4729
126328	4726
126328	4720
4729	4726
4729	4720
4726	4720
1373	435
594	593
594	1629
593	1629
29958	6566
4695	374291
4695	4728
4695	4722
374291	4728
374291	4722
4728	4722
27232	10165
4719	4724
4694	4724
126328	4724
4729	4724
4724	4726
4724	4720
5236	3939
4719	4723
4694	4723
126328	4723
4729	4723
4723	4726
4723	4720
5244	80270
11136	9380
9380	6519
23600	10165
2184	27232
1371	3145
6718	10165
4695	6389
6389	374291
6389	4728
6389	4722
4695	1738
1738	374291
1738	4728
1738	4722
3712	4594
7306	7299
6389	4724
80270	4351
3931	212
6389	4723
3712	38
1738	4724
5244	6718
1738	4723
23600	5244
594	1738
593	1738
1738	1629
50506	5172
2539	2235
4695	4724
374291	4724
4728	4724
4724	4722
210	3145
4695	4723
374291	4723
4728	4723
4723	4722
8659	1491
2539	5244
1371	5498
3242	383
435	8659
3145	5498
34	229
6389	1738
445	8659
2110	1376
2109	1376
2108	1376
38	4594
10682	50814
11136	1491
1491	6519
229	10165
6718	4351
2110	34
2109	34
2108	34
8659	5009
383	1491
5625	2731
5625	2653
5625	275
4594	84693
5244	2235
1376	1374
383	5009
5860	5092
4143	1491
3033	6566
2539	1371
4548	1491
3712	34
10841	7372
1890	7384
3033	3032
445	383
8659	2731
8659	2653
8659	275
7390	7389
8050	5160
1373	10166
2936	2876
1717	6309
4524	1491
23600	4351
2539	7390
445	34
1717	1718
435	383
9227	7299
4594	5009
445	4594
2936	2539
2539	2876
594	34
593	34
34	1629
5009	10166
34	27232
1376	34
2539	212
2110	229
2109	229
2108	229
435	34
6785	7299
1376	788
131669	5053
2936	212
1719	212
2876	212
131669	7306
1376	3939
10841	4548
1718	6309
1374	34
1719	7372
2184	80270
80270	10165
2184	229
435	4594
7306	5053
34	4594
4967	55163
10165	1491
34	3033
34	56922
80270	84701
27232	229
445	10166
501	7915
1373	56922
1376	10165
1376	3032
3242	8659
383	10157
8398	80025
8659	383
3295	1717
1719	10841
80270	27232
4023	1593
1376	5236
2184	3145
7054	1644
64087	8659
11136	383
383	6519
4719	6389
4694	6389
6389	126328
6389	4729
6389	4726
6389	4720
5244	226
1374	788
4719	10166
4694	10166
126328	10166
10166	4729
10166	4726
10166	4720
6309	10165
549	8398
7054	80025
3242	7372
9380	8659
7390	226
2184	4351
56922	5009
5244	10165
6785	9227
2184	10165
4967	7381
4967	27089
1376	3030
445	229
594	435
593	435
435	1629
445	56922
11136	8659
8659	6519
26503	7306
3712	84693
2539	80270
2184	210
56922	229
4719	1738
4694	1738
1738	126328
1738	4729
1738	4726
1738	4720
23600	27232
1644	5860
1373	383
2876	10165
34	5009
1374	3032
27232	1491
3939	6566
594	445
593	445
445	1629
2539	84701
5625	1491
3242	84693
6390	5409
34	8659
3712	8659
9380	51181
23600	229
1340	3032
2731	5860
2653	5860
275	5860
8659	10157
84693	2639
1374	229
594	4594
593	4594
4594	1629
594	5009
593	5009
1629	5009
2539	3931
6718	27232
19	4023
1373	4594
3242	10841
2876	6309
5244	27232
3712	594
3712	593
3712	1629
7381	3033
3033	27089
435	10166
435	56922
4524	8659
525	9380
2990	23169
3712	229
4594	229
1374	3033
1340	7381
1340	27089
1340	4723
5160	4723
1340	4724

## Sheet: PSGN (nodal interesection FSGN)
Entrez GeneID 1	Entrez GeneID 2
216	217
2308	5081
5740	5409
127534	2707
4093	659
336	3949
336	2053
3949	2053
1535	1536
94	2022
4688	653361
2132	2131
4688	1535
4688	1536
1535	653361
1536	653361
4292	4436
9365	2591
5627	5624
3753	3757
3753	9992
3757	9992
7249	7248
6392	6391
6101	3614
4338	4337
5277	51251
7067	50506
3784	2702
1411	3299
10913	128178
5311	5310
6392	6390
6708	6710
208	3172
208	3159
3172	3159
6295	5158
7421	1594
55505	55651
5106	5105
5795	8313
5795	27030
5795	2033
8313	27030
8313	2033
27030	2033
196527	3998
3868	3853
1122	1121
6891	6892
6891	6890
6892	6890
2956	5395
5897	5896
7508	1643
8792	8878
596	602
6340	6338
64240	64241
1290	1289
60529	4488
4291	2322
4291	8021
4291	4869
4291	8301
4291	8833
4291	54904
4291	1050
2322	8021
2322	4869
2322	8301
2322	8833
2322	54904
2322	1050
8021	4869
8021	8301
8021	8833
8021	54904
8021	1050
4869	8301
4869	8833
4869	54904
4869	1050
8301	8833
8301	54904
8301	1050
8833	54904
8833	1050
54904	1050
3674	3690
3868	3857
6391	54949
2161	196527
3691	3655
2812	2815
5506	5468
29914	3850
3918	3914
7124	1909
8438	83990
8438	8493
8438	9821
83990	8493
83990	9821
8493	9821
2158	2157
55755	55835
732	1675
1277	1278
5741	9247
1292	1291
6620	6622
57379	7374
10243	4338
10243	4337
142680	120227
3758	6557
3784	3753
3784	3757
3784	9992
9365	8074
8074	2591
8200	658
959	958
6017	5959
3753	6331
3757	6331
6331	9992
25	602
1144	1134
3852	103
10021	6331
4669	6448
79803	3257
79803	84062
79803	89781
79803	388552
3257	84062
3257	89781
3257	388552
84062	89781
84062	388552
89781	388552
9368	6569
6392	54949
602	1066
1594	120227
861	602
2956	4292
2956	4436
4292	5395
5395	4436
3098	669
462	5627
6390	6391
10577	4864
5795	207
207	8313
207	27030
207	2033
10083	7399
3426	1675
51218	54977
6340	6337
6338	6337
5740	185
185	5409
81693	8029
5795	4893
4893	8313
4893	27030
4893	2033
2539	3098
2539	669
6870	6866
6870	60675
6866	60675
7809	1188
7078	6785
7136	7140
7015	26277
8287	1617
8287	50511
7809	1187
1643	5429
50940	5573
7048	7046
142680	1594
3784	6331
7421	120227
54714	24
6448	138050
29914	7045
2161	3998
2155	196527
5096	5095
3918	3909
3914	3909
2155	3998
595	7428
7078	8842
2261	2255
1203	54982
8890	8892
8890	8891
8890	8893
8890	1967
8892	8891
8892	8893
8892	1967
8891	8893
8891	1967
8893	1967
7508	5429
3857	3848
84059	6323
4359	1959
7045	3850
5961	5959
6005	6710
56246	4158
6785	8842
7507	1643
57716	1959
7421	142680
4089	657
5961	8842
1411	2703
4000	10269
6710	286
64421	3981
7045	200576
6005	6708
4233	8312
338	336
338	3949
338	2053
6390	7428
5189	55670
4669	138050
2263	2255
7508	7507
6708	286
269	268
29914	200576
4593	1140
720	717
6833	2645
50506	389434
5376	4359
5605	5604
462	5624
1145	1140
3858	3848
6017	5961
57716	4747
4291	4297
4297	2322
4297	8021
4297	4869
4297	8301
4297	8833
4297	54904
4297	1050
5192	5194
5192	5830
5194	5830
7078	5961
5795	5157
5157	8313
5157	27030
5157	2033
554	359
6792	7337
8504	5195
8504	5824
5195	5824
731	732
5605	673
5604	673
3845	673
5376	57716
153201	54716
2538	2542
84059	6335
2741	2743
2741	9152
2743	9152
7157	1029
5345	2157
3845	5605
3845	5604
3691	3918
3691	3914
8200	3549
57716	81846
2159	196527
1896	10913
1896	128178
8504	5192
8504	5194
8504	5830
5192	5195
5192	5824
5194	5195
5194	5824
5195	5830
5830	5824
6010	5959
3075	1675
4771	4330
2720	2588
10021	2702
4703	58
7157	5157
10786	2542
6448	2799
6323	2566
6785	5961
2299	9132
2299	5962
2299	64699
9132	5962
9132	64699
5962	64699
183	1636
2242	5914
1285	1286
23590	27235
23590	57017
23590	57107
27235	57017
27235	57107
57017	57107
81846	4747
1290	1277
4593	1145
1308	3918
1308	3914
4629	4851
5189	5192
5189	5194
5189	5830
5192	55670
5194	55670
55670	5830
51371	3849
29914	83959
4609	8115
1188	1187
2157	196527
2299	3082
9132	3082
3082	5962
3082	64699
2155	2161
7078	7439
1373	5009
1289	1277
5913	285489
5634	5631
6927	3172
5157	8312
9333	27032
6392	7428
3674	2812
3674	2815
2147	5054
8504	5189
8504	55670
5189	5195
5189	5824
5195	55670
55670	5824
2308	5002
5002	5081
7067	7253
4893	207
3659	2064
5157	1499
5795	675
8313	675
27030	675
675	2033
3850	83959
3868	3848
5795	7157
57716	4359
7157	8313
7157	27030
7157	2033
2799	138050
51422	6331
4609	596
6663	1910
4747	1959
81846	1959
5578	1029
958	57379
2157	3998
445	5009
4669	2799
10083	65217
50506	6528
324	5157
6331	2702
4914	4803
6329	1180
5376	4747
5376	1959
3000	6121
3674	2159
3640	122042
4233	5157
4647	7399
5290	5157
3690	2812
3690	2815
731	1675
5825	5828
10516	2006
3032	3030
9211	1137
6654	7249
3674	7450
1161	2074
4137	5663
7039	5578
9573	392255
183	185
185	1636
344	4023
142680	1184
29914	4166
7043	3753
7043	3757
7043	9992
11136	6519
4166	200576
2147	2155
2155	5054
7078	24
5345	2158
7045	4166
1643	2073
65217	64072
4041	8322
4233	1499
7157	324
2157	2161
3426	3075
4291	4170
4291	4066
4291	602
4170	2322
4170	8021
4170	4869
4170	4066
4170	602
4170	8301
4170	8833
4170	54904
4170	1050
2322	4066
2322	602
8021	4066
8021	602
4869	4066
4869	602
4066	602
4066	8301
4066	8833
4066	54904
4066	1050
602	8301
602	8833
602	54904
602	1050
7167	3098
7167	669
5795	324
324	8313
324	27030
324	2033
7508	2073
64421	5897
64421	5896
2760	3073
7507	5429
8312	1499
2539	2821
6005	286
6017	8842
3717	4352
675	1029
1411	4810
2147	3998
3998	5054
3850	200576
7043	8048
435	5009
2299	11078
2299	71
11078	9132
11078	5962
11078	64699
71	9132
71	5962
71	64699
5290	1499
8287	3972
3630	2645
10083	64072
2263	7291
4291	861
861	2322
861	8021
861	4869
861	8301
861	8833
861	54904
861	1050
6886	8115
1203	1200
2263	2261
23600	6718
153201	8659
54716	8659
7043	6331
4747	4359
7879	4747
3040	3043
51062	123606
582	583
582	585
582	51057
582	79738
582	84100
582	55212
582	129880
582	123016
583	585
583	51057
583	79738
583	84100
583	55212
583	129880
583	123016
585	51057
585	79738
585	84100
585	55212
585	129880
585	123016
51057	79738
51057	84100
51057	55212
51057	129880
51057	123016
79738	84100
79738	55212
79738	129880
79738	123016
84100	55212
84100	129880
84100	123016
55212	129880
55212	123016
129880	123016
5376	81846
958	7374
11078	3082
71	3082
6654	7248
4291	5159
4170	5159
2322	5159
8021	5159
4869	5159
4066	5159
5159	602
5159	8301
5159	8833
5159	54904
5159	1050
4286	7299
1308	3909
7480	7476
4254	103
4292	1029
4436	1029
2160	5742
5742	7450
3784	10021
3690	7450
2731	2653
2731	275
2653	275
2539	7167
7476	64327
435	445
50846	6736
59344	242
7157	675
4297	4602
4297	3195
4297	5087
5956	8842
1302	1280
54714	5956
675	79577
84059	7399
1421	8419
3549	658
29914	30813
948	3673
3690	3673
3850	4166
3691	3909
7381	27089
7381	54902
27089	54902
7450	64805
5625	8659
8200	9241
7077	8438
7077	83990
7077	8493
7077	9821
7169	7136
7169	7140
1121	6102
6005	6521
51422	10021
81846	4359
9380	189
5224	5837
9211	6326
1203	2055
149461	10686
4292	2308
4292	5081
2308	4436
4436	5081
6390	23095
3630	6833
5795	5290
5290	8313
5290	27030
5290	2033
7051	59344
7051	242
6708	2038
23414	1482
8200	64327
1675	5199
183	5972
1636	5972
324	8312
1643	2068
7157	207
5205	8647
1188	6557
7067	6528
2876	6708
7067	7173
3209	658
7157	8312
2159	2162
65217	7399
4621	7136
4621	7140
6710	6521
7067	7080
6710	2038
7507	2068
3848	127534
3848	2707
1200	54982
1836	1280
5345	5742
2159	2157
5657	720
7157	4893
7051	3849
80270	6718
582	8195
583	8195
585	8195
51057	8195
79738	8195
8195	84100
8195	55212
8195	129880
8195	123016
1718	6654
7157	1499
207	675
51062	6687
2159	3690
596	1066
5157	207
8200	2192
7173	50506
1908	1910
2157	5742
2157	7450
2956	2308
2956	5081
5395	2308
5395	5081
2161	3818
7450	2812
7450	2815
7490	675
9657	261734
6017	6010
8438	5002
83990	5002
8493	5002
9821	5002
2916	6295
6389	644096
6295	5959
4609	1066
3849	3848
6340	1585
6338	1585
6770	1589
8048	2771
23600	80270
1103	1145
3858	3849
3691	1308
7168	7139
324	6654
1373	445
6928	3172
7508	2068
4291	4609
4609	4170
4609	2322
4609	8021
4609	4869
4609	4066
4609	5159
4609	602
4609	8301
4609	8833
4609	54904
4609	1050
26121	762
26121	7287
762	7287
5290	207
2263	2260
6005	2876
4893	5157
5314	27031
11078	71
324	4893
5795	2308
5795	5081
2308	8313
2308	27030
2308	2033
8313	5081
27030	5081
2033	5081
1411	10484
2876	6710
6559	6557
185	5972
4609	861
3717	54583
1630	392255
6708	6521
2539	226
8438	207
83990	207
8493	207
9821	207
6870	84634
6866	84634
84634	60675
7003	23418
6591	1908
6326	1137
4724	91942
4286	6591
7507	2073
51371	3848
7249	4330
335	4069
4089	2022
7827	51196
7043	51422
4893	675
65055	123606
6399	1280
3758	6559
8438	1029
83990	1029
8493	1029
9821	1029
7048	4851
10558	7879
5795	1029
8313	1029
27030	1029
2033	1029
2158	7450
10083	4647
3690	5742
7046	4851
4297	4170
4297	4066
4297	602
959	57379
1421	2703
2746	6566
324	1499
582	80184
583	80184
585	80184
51057	80184
79738	80184
84100	80184
55212	80184
80184	129880
80184	123016
3674	5742
3861	3852
5224	3939
4297	861
477	773
5741	846
846	9247
9381	2299
9381	9132
9381	5962
9381	64699
324	207
2978	83394
7067	7252
51422	3753
51422	3757
51422	9992
4948	7306
80326	4487
1200	2055
4724	4723
4723	91942
5224	5236
8292	1145
208	6927
6927	3159
3674	64805
11186	1326
11186	1956
1326	1956
5961	6101
5961	3614
2147	2161
2147	196527
2161	5054
3791	5578
196527	5054
7450	196527
2192	64327
3690	64805
9533	6949
7003	1122
1387	1630
56246	9095
596	25
50506	7253
6208	212
7043	3784
91647	54968
3758	1188
7078	1001
83394	6785
2160	7450
24	8842
6010	5158
4607	6331
94	4089
1184	6569
8200	3209
64324	1028
6687	123606
5205	1244
9381	3082
6440	6439
8195	80184
7248	4330
5327	3273
4602	3195
4602	5087
5155	4330
3195	5087
4607	10021
1145	1144
1145	1134
23590	54840
27235	54840
54840	57017
54840	57107
4297	5159
7879	81846
5158	6101
5158	3614
116085	7369
5742	64805
7439	5956
2159	7450
29078	4719
29078	4694
29078	80224
29078	79133
29078	25915
29078	4729
29078	4726
29078	4720
4719	4694
4719	80224
4719	79133
4719	25915
4719	4729
4719	4726
4719	4720
4694	80224
4694	79133
4694	25915
4694	4729
4694	4726
4694	4720
80224	79133
80224	25915
80224	4729
80224	4726
80224	4720
79133	25915
79133	4729
79133	4726
79133	4720
25915	4729
25915	4726
25915	4720
4729	4726
4729	4720
4726	4720
2645	3172
51371	3858
4292	4609
4609	4436
8287	367
6770	190
6736	207
2201	4851
7480	64327
3854	80326
4233	7157
401	10381
1836	2317
4968	6927
596	861
8675	2778
4254	3852
51062	6683
2299	64072
64072	9132
64072	5962
64072	64699
6017	10002
10002	8842
999	5290
6017	7078
2157	2160
1733	7173
486	149461
57716	7879
8842	6101
8842	3614
2192	9241
4644	5873
4233	324
5189	5828
55670	5828
121512	1959
4882	3549
23418	1122
5345	2160
4647	65217
91147	23322
57465	2566
7439	8842
3784	8048
3674	2162
6392	23095
2073	2068
2157	2677
6390	5979
486	6559
6356	30009
2956	4609
4609	5395
207	1029
1280	4322
2299	5456
9132	5456
5962	5456
64699	5456
5290	324
999	207
3315	4747
1373	435
3098	226
226	669
64072	3082
51422	3784
595	3791
3753	8048
3757	8048
8048	9992
27032	1041
3239	64327
7157	5290
9368	1184
6687	6683
64327	658
4621	7169
7043	70
57716	121512
78987	4093
3858	27032
7067	1733
1733	50506
336	4023
4023	3949
4023	2053
5290	8312
375790	285489
859	1180
2158	5742
6687	9420
29929	196527
4292	5795
4292	8313
4292	27030
4292	2033
5795	4436
4436	8313
4436	27030
4436	2033
6591	1910
1244	10165
582	22954
583	22954
585	22954
51057	22954
22954	79738
22954	84100
22954	55212
22954	129880
22954	123016
2301	2703
6331	8048
3239	2192
6010	6101
6010	3614
2159	2161
4593	5913
3708	10939
7846	5048
2159	2677
2539	286
3082	5456
7003	1462
4292	8438
4292	83990
4292	8493
4292	9821
8438	4436
83990	4436
8493	4436
9821	4436
7476	3549
7015	1736
116085	5631
4291	4602
4291	2242
4291	5914
4291	3195
4291	5087
4602	2322
4602	8021
4602	4869
4602	8301
4602	8833
4602	54904
4602	1050
2242	2322
2242	8021
2242	4869
2242	8301
2242	8833
2242	54904
2242	1050
2322	5914
2322	3195
2322	5087
8021	5914
8021	3195
8021	5087
4869	5914
4869	3195
4869	5087
8301	5914
8301	3195
8301	5087
5914	8833
5914	54904
5914	1050
8833	3195
8833	5087
54904	3195
54904	5087
3195	1050
1050	5087
7067	389434
594	593
594	1629
593	1629
3766	6559
286	6521
8287	3077
3674	2160
207	1499
1828	127534
1828	2707
999	8438
999	83990
999	8493
999	9821
7879	9927
3791	7428
29958	6566
8292	1140
4618	1785
8200	7476
2071	2068
3728	3753
3728	3757
3728	9992
1643	5578
7508	5578
4291	8115
8115	4170
8115	2322
8115	8021
8115	4869
8115	4066
8115	602
8115	8301
8115	8833
8115	54904
8115	1050
3857	127534
3857	2707
2162	2160
196527	4351
121512	81846
5236	5837
6683	123606
4893	1029
7879	23095
1140	5913
324	1029
121512	4747
3690	6916
930	1675
2155	2157
5159	4352
6017	5158
2538	10786
1736	55505
1736	55651
23503	65055
5264	5191
7450	3998
4292	324
324	4436
70	6331
1828	3857
2202	23418
4867	261734
1301	1280
1311	1280
9241	3549
10021	4878
7157	8438
7157	83990
7157	8493
7157	9821
51422	2702
1187	6557
348	351
2317	1280
5244	8647
1617	50511
7476	658
3850	30813
23495	5897
23495	5896
4976	5956
8048	2702
8287	55315
2308	4893
4893	5081
1145	5913
2876	286
6399	1297
5742	6916
10397	81846
2308	207
207	5081
2324	54345
2160	2677
2978	200576
411	2720
930	5897
930	5896
65217	2299
65217	9132
65217	5962
65217	64699
5256	5836
124583	3549
6834	4695
6834	1355
6834	374291
6834	4728
6834	4722
4695	1355
4695	374291
4695	4728
4695	4722
1355	374291
1355	4728
1355	4722
1311	4322
374291	4728
374291	4722
4728	4722
4291	1029
2322	1029
2308	1029
8021	1029
4869	1029
8301	1029
8833	1029
54904	1029
1050	1029
1029	5081
4297	4609
2068	5429
3299	2703
9227	5959
930	3047
3098	286
669	286
3717	5159
5224	5255
6010	5961
7849	50506
54714	8842
10483	286
3858	127534
3858	2707
554	1585
27232	10165
65055	9420
7003	2703
4291	3717
3717	2322
3717	8021
3717	4869
3717	8301
3717	8833
3717	54904
3717	1050
486	10686
1146	1144
1146	1134
6017	24
959	7374
23169	1280
6323	57465
161742	6654
2539	3043
8031	23405
5108	23405
23405	8805
23405	9950
23405	51592
8115	5159
2978	1261
2978	5146
4292	7157
7157	4436
4233	5290
10397	4747
1122	6102
5313	286
4609	5925
8438	1499
83990	1499
8493	1499
9821	1499
7809	6557
3659	4595
5578	5429
23503	123606
2162	7450
3674	6916
9381	11078
9381	71
6718	8647
22954	8195
3848	27032
26121	24
24	762
24	7287
9562	4893
5727	2736
79083	5873
51062	65055
1311	3549
6654	4763
596	8115
8287	1080
10083	2299
10083	9132
10083	5962
10083	64699
7879	1959
5345	7450
65217	3082
3849	9076
7173	23405
2316	2317
8647	1244
5244	5205
1122	1462
1642	2073
64327	3549
2162	2677
411	2588
3315	7879
65055	118813
3778	1476
1280	3549
9420	123606
65055	6687
717	11277
5313	2539
6654	4771
29914	9180
51062	9420
78987	659
7490	6736
8292	1103
55764	4851
3043	3098
3043	669
182	23414
1411	2512
8195	54903
2908	1586
2162	8287
51422	8048
94	83605
1411	4952
24	10002
412	3849
5158	5961
3791	2324
9227	5961
9927	4747
4747	8898
10083	3082
6392	5979
7547	27031
1103	1140
2157	2162
284119	10021
1201	54982
5621	6908
5157	675
7439	10002
5158	5959
1311	6399
2202	10002
3291	1585
8419	2703
3315	81846
7879	4359
999	4595
4595	2064
2160	64805
1545	5080
1585	6557
7084	8803
582	54903
583	54903
585	54903
51057	54903
79738	54903
84100	54903
55212	54903
129880	54903
123016	54903
83394	5961
29078	4724
29078	91942
4719	4724
4719	91942
4694	4724
4694	91942
80224	4724
80224	91942
79133	4724
79133	91942
25915	4724
25915	91942
4729	4724
4729	91942
4724	4726
4724	4720
4726	91942
4720	91942
5795	6736
6736	8313
6736	27030
6736	2033
5158	8842
121512	4359
23418	1462
4552	4548
4221	6654
959	355
4851	2006
3753	10021
3757	10021
10021	9992
3753	775
3757	775
775	9992
103	4948
8292	4593
2055	54982
57716	10397
64805	6916
5376	121512
11078	64072
64072	71
7314	23314
5309	2703
6102	6101
6102	3614
2192	6299
7381	617
27089	617
617	54902
8643	51684
8643	6598
8031	5108
8031	8805
8031	9950
8031	51592
5108	8805
5108	9950
5108	51592
51684	6598
8805	9950
8805	51592
9950	51592
3815	6654
1733	23405
9639	121512
83605	2022
2821	3098
2821	669
3708	6712
4593	1103
1200	1201
7043	10021
10021	8048
6017	9227
51422	70
2771	6262
9241	64327
7380	5979
9211	2566
5805	2643
3674	4627
5313	3098
5313	669
6017	7439
10555	5506
2192	658
5727	6654
778	7299
2158	2161
4297	1991
57716	3315
4261	695
3938	6523
4291	596
596	4170
596	2322
596	8021
596	4869
596	4066
596	8301
596	8833
596	54904
596	1050
5236	3939
3758	1187
29078	4723
4719	4723
4694	4723
80224	4723
79133	4723
25915	4723
4729	4723
4723	4726
4723	4720
2643	5860
2159	3998
2335	675
6314	6310
5376	8898
6772	3460
6772	3459
6772	3593
3460	3459
3460	3593
3459	3593
2159	2812
2159	2815
6310	6311
2158	2677
7067	8085
284119	1180
6017	6295
7043	2771
2159	2160
2956	1029
5395	1029
91147	56623
4292	207
4436	207
6017	6101
6017	3614
11078	5456
71	5456
9927	81846
6323	6335
9211	57465
3674	7454
7078	10002
9639	10397
6755	1027
7080	50506
10555	5468
11186	5002
1326	5002
5002	1956
1289	1281
6295	8842
5578	2071
4291	1991
4221	1027
2322	1991
8021	1991
4869	1991
8301	1991
8833	1991
54904	1991
1991	1050
57716	8898
4297	8115
2158	2160
2202	1462
5376	7879
1280	2588
3815	5156
1311	4882
7045	83959
411	79158
340024	8659
1959	8898
2159	2158
70	85366
1462	6102
7168	70
1643	2074
7050	5727
10002	5158
1311	1297
4297	2242
4297	5914
5345	2162
5244	80270
778	5959
208	6928
6928	3159
120892	65018
4607	70
7003	6102
3939	5837
8287	641
2308	7157
7157	5081
4647	64072
7507	5578
3561	5897
3561	5896
55755	259266
55835	259266
22954	80184
6663	1908
930	7372
1184	120227
6295	6101
6295	3614
8438	324
324	83990
324	8493
324	9821
6496	7050
7476	6913
3655	3918
3655	3914
732	3426
23503	6687
3784	2771
2308	4763
4763	5081
78987	64220
7439	1122
3758	7809
3690	2162
1144	1140
1134	1140
675	1028
11136	9380
9380	6519
83394	1121
4607	51422
23600	10165
204	1991
2741	10243
2743	10243
9152	10243
1278	5479
4627	2812
4627	2815
2308	7249
7249	5081
5376	10397
5313	6005
6295	1121
4860	355
7490	1586
2184	27232
57716	9639
7450	6916
596	5159
4359	8898
3753	2771
3757	2771
2771	9992
1371	3145
3329	123606
3690	4627
51062	3329
1586	3972
8200	124583
1281	7148
958	355
3293	3972
4286	4935
861	4170
861	4066
51062	23503
10021	4000
2263	2316
2301	30062
7507	2074
79577	1029
1290	1281
7067	23405
24	5961
23405	50506
411	1280
5657	3075
1188	6559
5521	5582
4607	7043
340024	153201
340024	54716
23095	7428
2192	64093
3791	10786
1244	2584
8200	4882
1188	1585
5290	8438
5290	83990
5290	8493
5290	9821
103	7306
103	6591
6794	657
4291	3815
2322	3815
3815	8021
3815	4869
3815	8301
3815	8833
3815	54904
3815	1050
124583	658
2317	3549
10397	4359
7173	389434
8048	6262
64421	3561
5376	3315
23503	9420
2260	2316
23095	4747
2263	2737
2192	7476
5663	7305
3728	6331
9639	4747
4254	51371
57338	5621
51314	3426
4291	7157
2322	7157
7157	8021
7157	4869
7157	8301
7157	8833
7157	54904
7157	1050
8200	2316
6295	5961
6295	6102
701	675
3673	2812
3673	2815
103	55612
116085	5634
4893	79577
1261	5146
8504	5828
5195	5828
5824	5828
5795	701
701	8313
701	27030
701	2033
1828	3868
7508	2074
5578	2068
7439	24
3293	1586
10002	5961
11200	2308
11200	5081
9562	23405
2990	411
7046	2200
9639	1959
8600	760
5309	2301
3861	3918
3861	3914
2201	2200
10083	124590
6870	3973
6866	3973
3973	60675
3651	6928
9095	6505
65018	11315
80184	54903
3659	5290
3758	1585
1410	1674
3291	6340
3291	6338
6010	7439
25	1066
5290	4893
7428	54583
6770	1584
4607	2702
23495	695
1184	1594
5255	3939
7068	7253
2261	4882
100	355
9639	81846
54658	1244
65217	11078
65217	71
355	204
23600	1244
64072	124590
1280	9451
1736	26277
10913	4487
4487	128178
5728	5578
2916	778
8565	4747
2308	5157
5157	5081
2147	2157
2157	5054
5373	196527
1836	3930
153201	5625
54716	5625
1280	3930
3549	4322
7547	4838
2317	4882
10913	80326
80326	128178
2160	2812
2160	2815
190	9095
5192	5828
5194	5828
5830	5828
3209	64327
81693	2694
8029	2694
861	25
5959	6101
5959	3614
1896	4487
3717	861
6356	50615
2308	7248
7248	5081
9211	6323
2539	6708
861	5159
1785	4747
4286	1908
100	23495
3209	7476
2316	3549
4000	5506
861	64805
925	23495
10397	1959
23495	3561
3690	7454
326625	4594
23503	6683
7879	121512
6017	9573
2263	5447
2261	3549
5116	3549
930	695
1121	1462
5345	2677
1280	4882
10397	8898
103	1908
208	2645
2645	3159
2916	6102
1001	5818
5727	1540
7490	3972
3047	355
23600	5205
50506	7252
1828	51371
5313	10483
8200	2317
2192	2316
100	4860
3265	5578
1203	1201
959	3702
5649	259266
2771	2702
8504	5825
5195	5825
5825	5824
3690	84930
326625	84693
4644	79083
9333	23385
7048	2200
10483	3098
10483	669
5213	286
5255	5236
10913	5818
128178	5818
1896	8626
7078	54714
10083	11078
10083	71
2956	861
5395	861
3673	7450
925	3561
100	204
2956	7249
5395	7249
58	1145
50846	5795
50846	8313
50846	27030
50846	2033
4297	596
5742	861
89884	2688
10021	788
9227	5158
3674	861
2155	4247
29914	2934
1811	6340
1811	6338
3868	127534
3868	2707
9657	4867
595	79577
10133	1545
3981	3561
1103	1144
1103	1134
3690	2160
2316	1280
8200	1280
3239	7476
2261	1280
5205	80270
3239	2316
3239	3209
4644	103
121512	8898
5255	5837
5781	196527
100	64421
4625	8557
1828	3853
5795	1499
8313	1499
27030	1499
2033	1499
81846	8898
2308	701
701	5081
3315	1959
7849	6528
56652	5428
2263	9401
5192	5825
5194	5825
5830	5825
10397	121512
326625	3712
2162	2812
2162	2815
5376	9639
2260	2317
7401	124590
5205	6718
[truncated: 15,234 more rows]
