# Supplementary material for: Global Analysis of the Human Pathophenotypic Similarity Gene Network Merges Disease Module Components
Source: PLoS One. 2013 Feb 21;8(2):e56653. doi: 10.1371/journal.pone.0056653 (PMC3578923; doi:10.1371/journal.pone.0056653)
Supplement: Table S7 — Pathophenotypic similarity gene network. (XLS) [file pone.0056653.s010.xls]

## Sheet: PSGN
Entrez GeneID 1	Entrez GeneID 2	Pathophenotypic similarity
216	217	6.809
3859	3850	6.6739
2308	5081	6.4036
5740	5409	6.3077
127534	2707	6.1851
4093	659	5.8056
336	3949	5.6346
336	2053	5.6346
3949	2053	5.6346
843	355	5.6157
5956	2652	5.5769
1535	1536	5.571
94	2022	5.5417
4688	653361	5.5215
2132	2131	5.4527
4688	1535	5.4259
4688	1536	5.4259
1535	653361	5.4259
1536	653361	5.4259
7399	79955	5.415
4292	4436	5.3837
9365	2591	5.2778
5627	5624	5.2304
3753	3757	5.2259
3753	9992	5.2259
3757	9992	5.2259
7249	7248	5.2019
6392	6391	5.1455
6100	6101	5.1271
6100	3614	5.1271
6101	3614	5.1271
4338	4337	5.1138
5277	51251	5.1068
7067	50506	5.1025
84930	22852	5.0762
3854	3872	5.0672
4261	8625	5.0503
4261	5994	5.0503
4261	5993	5.0503
8625	5994	5.0503
8625	5993	5.0503
5994	5993	5.0503
3784	2702	4.9836
1411	3299	4.9484
10913	128178	4.9481
29851	23495	4.9414
5311	5310	4.9407
6392	6390	4.9362
6708	6710	4.9211
10021	287	4.844
153562	64072	4.8175
80144	341640	4.8161
208	3172	4.8145
208	3159	4.8145
3172	3159	4.8145
8675	149775	4.787
6295	5158	4.7852
602	613	4.7704
7421	1594	4.7663
55505	55651	4.749
5106	5105	4.7401
5795	8313	4.7321
5795	27030	4.7321
5795	2033	4.7321
8313	27030	4.7321
8313	2033	4.7321
27030	2033	4.7321
196527	3998	4.7135
3868	3853	4.6921
1122	1121	4.6825
6891	6892	4.674
6891	6890	4.674
6892	6890	4.674
2956	5395	4.6706
5897	5896	4.6684
7508	1643	4.6452
7015	7012	4.6442
8792	8878	4.6259
596	602	4.6172
6340	6338	4.6131
64240	64241	4.607
3785	3786	4.591
1290	1289	4.5889
60529	4488	4.5832
2120	4291	4.5633
2120	6455	4.5633
2120	2322	4.5633
2120	8021	4.5633
2120	8028	4.5633
2120	4026	4.5633
2120	23365	4.5633
2120	4869	4.5633
2120	8301	4.5633
2120	8833	4.5633
2120	54904	4.5633
2120	1050	4.5633
4291	6455	4.5633
4291	2322	4.5633
4291	8021	4.5633
4291	8028	4.5633
4291	4026	4.5633
4291	23365	4.5633
4291	4869	4.5633
4291	8301	4.5633
4291	8833	4.5633
4291	54904	4.5633
4291	1050	4.5633
6455	2322	4.5633
6455	8021	4.5633
6455	8028	4.5633
6455	4026	4.5633
6455	23365	4.5633
6455	4869	4.5633
6455	8301	4.5633
6455	8833	4.5633
6455	54904	4.5633
6455	1050	4.5633
2322	8021	4.5633
2322	8028	4.5633
2322	4026	4.5633
2322	23365	4.5633
2322	4869	4.5633
2322	8301	4.5633
2322	8833	4.5633
2322	54904	4.5633
2322	1050	4.5633
8021	8028	4.5633
8021	4026	4.5633
8021	23365	4.5633
8021	4869	4.5633
8021	8301	4.5633
8021	8833	4.5633
8021	54904	4.5633
8021	1050	4.5633
8028	4026	4.5633
8028	23365	4.5633
8028	4869	4.5633
8028	8301	4.5633
8028	8833	4.5633
8028	54904	4.5633
8028	1050	4.5633
4026	23365	4.5633
4026	4869	4.5633
4026	8301	4.5633
4026	8833	4.5633
4026	54904	4.5633
4026	1050	4.5633
23365	4869	4.5633
23365	8301	4.5633
23365	8833	4.5633
23365	54904	4.5633
23365	1050	4.5633
4869	8301	4.5633
4869	8833	4.5633
4869	54904	4.5633
4869	1050	4.5633
8301	8833	4.5633
8301	54904	4.5633
8301	1050	4.5633
8833	54904	4.5633
8833	1050	4.5633
54904	1050	4.5633
3674	3690	4.5586
3868	3857	4.5362
1293	1291	4.5278
6391	54949	4.5226
2161	196527	4.5192
3691	3655	4.5122
2812	2815	4.5075
5506	5468	4.4936
4692	6638	4.492
10984	1028	4.4733
29914	3859	4.4724
29914	3850	4.4724
3918	3914	4.4696
7124	1909	4.4683
8438	83990	4.4577
8438	8493	4.4577
8438	9821	4.4577
83990	8493	4.4577
83990	9821	4.4577
8493	9821	4.4577
2158	2157	4.4536
10117	286077	4.4479
55755	55835	4.4465
9723	55636	4.4427
732	1675	4.4349
1813	8910	4.4221
7957	378884	4.4201
1277	1278	4.407
5741	9247	4.4048
1292	1293	4.4008
1292	1291	4.4008
6620	6622	4.4
3753	287	4.3915
3757	287	4.3915
9992	287	4.3915
57379	7374	4.3781
10243	4338	4.3772
10243	4337	4.3772
142680	120227	4.3744
3758	6557	4.3729
2153	2161	4.365
3784	3753	4.3621
3784	3757	4.3621
3784	9992	4.3621
9365	8074	4.3499
8074	2591	4.3499
8200	658	4.3491
959	958	4.3445
54209	7305	4.3386
10516	30008	4.3373
6017	5959	4.334
3753	6331	4.3282
3757	6331	4.3282
6331	9992	4.3282
6331	287	4.2965
25	602	4.2828
5644	6690	4.2772
1144	1134	4.2739
3852	103	4.2705
10021	6331	4.2568
4669	6448	4.2426
79803	3257	4.2416
79803	84062	4.2416
79803	89781	4.2416
79803	11234	4.2416
79803	388552	4.2416
79803	84343	4.2416
3257	84062	4.2416
3257	89781	4.2416
3257	11234	4.2416
3257	388552	4.2416
3257	84343	4.2416
84062	89781	4.2416
84062	11234	4.2416
84062	388552	4.2416
84062	84343	4.2416
89781	11234	4.2416
89781	388552	4.2416
89781	84343	4.2416
11234	388552	4.2416
11234	84343	4.2416
388552	84343	4.2416
9368	6569	4.2342
6392	54949	4.2313
602	1066	4.2274
1594	120227	4.2268
861	602	4.2213
2956	4292	4.2052
2956	4436	4.2052
4292	5395	4.2052
5395	4436	4.2052
11231	5589	4.2026
2110	2109	4.1918
2110	2108	4.1918
2109	2108	4.1918
3098	669	4.1709
462	5627	4.1698
6390	6391	4.1563
10577	4864	4.154
5795	207	4.1475
207	8313	4.1475
207	27030	4.1475
207	2033	4.1475
10083	7399	4.1465
10083	79955	4.1465
26580	10555	4.1439
3426	1675	4.143
51218	54977	4.1397
6340	6337	4.1294
6338	6337	4.1294
79784	71	4.1293
79784	1687	4.1293
71	1687	4.1293
5740	185	4.1235
185	5409	4.1235
2121	132884	4.1228
81693	8029	4.1174
5795	4893	4.0999
4893	8313	4.0999
4893	27030	4.0999
4893	2033	4.0999
2539	3098	4.0945
2539	669	4.0945
8287	6795	4.0936
6870	6866	4.0805
6870	26012	4.0805
6870	60675	4.0805
6866	26012	4.0805
6866	60675	4.0805
26012	60675	4.0805
7809	1188	4.0782
7078	6785	4.0774
7136	7140	4.0708
7015	26277	4.0699
7012	26277	4.0699
8287	1617	4.0671
8287	50511	4.0671
7809	1187	4.0647
1643	5429	4.0637
3784	287	4.0601
50940	5573	4.0589
137814	55997	4.0515
7048	7046	4.0474
142680	1594	4.0457
3784	6331	4.0442
7421	120227	4.0425
54714	24	4.0415
6448	138050	4.0413
29914	7045	4.0351
2161	3998	4.0331
2155	196527	4.0327
5096	5095	4.0327
3918	3909	4.0305
3914	3909	4.0305
2155	3998	4.0267
595	7428	4.025
7078	8842	4.0234
2261	2255	4.0216
1203	54982	4.0174
8890	8892	4.0132
8890	8891	4.0132
8890	8893	4.0132
8890	1967	4.0132
8892	8891	4.0132
8892	8893	4.0132
8892	1967	4.0132
8891	8893	4.0132
8891	1967	4.0132
8893	1967	4.0132
7066	4352	4.0054
7508	5429	4.0037
3857	3848	3.9943
84059	6323	3.9844
4359	1959	3.9844
7045	3859	3.9653
7045	3850	3.9653
5961	5959	3.9639
23414	2657	3.9637
11236	84925	3.9607
11236	4968	3.9607
84925	4968	3.9607
6795	3972	3.9571
6005	6710	3.9516
1824	3753	3.9473
1824	3757	3.9473
1824	9992	3.9473
56246	4158	3.947
6785	8842	3.9467
7507	1643	3.9455
3315	26353	3.9445
57716	1959	3.9426
2811	2812	3.9401
2811	2815	3.9401
7421	142680	3.9391
25	613	3.9384
4089	657	3.938
5961	8842	3.9377
1411	2703	3.9354
4000	10269	3.9318
147138	11322	3.9239
5318	3753	3.9238
5318	3757	3.9238
5318	9992	3.9238
6710	286	3.9227
4070	200576	3.9198
64421	3981	3.9189
7045	200576	3.918
10483	146059	3.913
6005	6708	3.9081
4233	8312	3.9045
338	336	3.9043
338	3949	3.9043
338	2053	3.9043
3798	9897	3.8888
6390	7428	3.8841
51062	9897	3.8828
2153	3998	3.8783
5189	55670	3.8782
4669	138050	3.8763
2263	2255	3.8763
7508	7507	3.8713
1824	5318	3.8664
6708	286	3.8646
269	268	3.8593
1829	7043	3.8509
29914	200576	3.8502
4593	1140	3.8472
720	717	3.8449
9897	123606	3.8445
51360	6303	3.8282
6833	2645	3.8277
50506	389434	3.8275
5376	4359	3.8211
1729	79784	3.8179
1729	71	3.8179
1729	1687	3.8179
5605	5604	3.8158
1824	6331	3.8106
462	5624	3.8088
1829	5318	3.8049
1145	1140	3.8033
3858	3848	3.8026
6017	5961	3.8017
3039	3043	3.8002
57716	4747	3.7973
10984	283120	3.7971
283120	1028	3.7971
2120	4297	3.7938
4291	4297	3.7938
4297	6455	3.7938
4297	2322	3.7938
4297	8021	3.7938
4297	8028	3.7938
4297	4026	3.7938
4297	23365	3.7938
4297	4869	3.7938
4297	8301	3.7938
4297	8833	3.7938
4297	54904	3.7938
4297	1050	3.7938
5192	5194	3.7915
5192	5830	3.7915
5194	5830	3.7915
7078	5961	3.7854
5795	5157	3.7843
5157	8313	3.7843
5157	27030	3.7843
5157	2033	3.7843
554	359	3.7836
6792	7337	3.7826
8504	5195	3.7821
8504	5824	3.7821
5195	5824	3.7821
8291	8557	3.7814
731	732	3.777
5605	673	3.7722
5604	673	3.7722
3845	673	3.7659
5376	57716	3.7658
1300	4322	3.759
153201	54716	3.7576
2538	2542	3.7574
84059	6335	3.7564
2741	2743	3.755
2741	9152	3.755
2743	9152	3.755
1824	7043	3.7485
7157	1029	3.7447
5345	2157	3.7443
3845	5605	3.7436
3845	5604	3.7436
3691	3918	3.7408
3691	3914	3.7408
8200	3549	3.7403
57716	81846	3.7397
4297	613	3.7358
2159	196527	3.7314
326625	166785	3.7246
1896	10913	3.7238
1896	128178	3.7238
8504	5192	3.7232
8504	5194	3.7232
8504	5830	3.7232
5192	5195	3.7232
5192	5824	3.7232
5194	5195	3.7232
5194	5824	3.7232
5195	5830	3.7232
5830	5824	3.7232
4653	1545	3.7224
6010	5959	3.7112
3075	1675	3.711
4771	4330	3.7068
2720	2588	3.7048
7066	3717	3.702
10021	2702	3.7019
4703	58	3.7017
7157	5157	3.6983
10786	2542	3.6973
3887	3889	3.6973
3887	3892	3.6973
3889	3892	3.6973
6448	2799	3.6968
57716	9516	3.6876
6323	2566	3.6871
6785	5961	3.686
286676	117531	3.6853
286676	7007	3.6853
286676	2299	3.6853
286676	9132	3.6853
286676	5962	3.6853
286676	64699	3.6853
286676	2070	3.6853
286676	79977	3.6853
117531	7007	3.6853
117531	2299	3.6853
117531	9132	3.6853
117531	5962	3.6853
117531	64699	3.6853
117531	2070	3.6853
117531	79977	3.6853
7007	2299	3.6853
7007	9132	3.6853
7007	5962	3.6853
7007	64699	3.6853
7007	2070	3.6853
7007	79977	3.6853
2299	9132	3.6853
2299	5962	3.6853
2299	64699	3.6853
2299	2070	3.6853
2299	79977	3.6853
9132	5962	3.6853
9132	64699	3.6853
9132	2070	3.6853
9132	79977	3.6853
5962	64699	3.6853
5962	2070	3.6853
5962	79977	3.6853
64699	2070	3.6853
64699	79977	3.6853
2070	79977	3.6853
183	1636	3.6828
2242	5914	3.6802
1285	1286	3.6782
23590	27235	3.6777
23590	56997	3.6777
23590	57017	3.6777
23590	57107	3.6777
27235	56997	3.6777
27235	57017	3.6777
27235	57107	3.6777
56997	57017	3.6777
56997	57107	3.6777
57017	57107	3.6777
81846	4747	3.6769
1290	1277	3.6766
4593	1145	3.6733
1308	3918	3.6703
1308	3914	3.6703
4629	4851	3.6702
5189	5192	3.6675
5189	5194	3.6675
5189	5830	3.6675
5192	55670	3.6675
5194	55670	3.6675
55670	5830	3.6675
3798	123606	3.6657
51371	3849	3.6652
7873	1029	3.662
29914	83959	3.6618
29914	1296	3.6618
4609	8115	3.6585
5627	3053	3.6558
55812	6100	3.6557
55812	6101	3.6557
55812	3614	3.6557
2120	613	3.6544
4291	613	3.6544
6455	613	3.6544
2322	613	3.6544
6315	724066	3.6544
8021	613	3.6544
8028	613	3.6544
4026	613	3.6544
23365	613	3.6544
4869	613	3.6544
8301	613	3.6544
613	8833	3.6544
613	54904	3.6544
613	1050	3.6544
1188	1187	3.6516
2157	196527	3.648
286676	3082	3.6476
286676	51168	3.6476
117531	3082	3.6476
117531	51168	3.6476
7007	3082	3.6476
7007	51168	3.6476
2299	3082	3.6476
2299	51168	3.6476
9132	3082	3.6476
9132	51168	3.6476
3082	5962	3.6476
3082	64699	3.6476
3082	2070	3.6476
3082	79977	3.6476
5962	51168	3.6476
51168	64699	3.6476
51168	2070	3.6476
51168	79977	3.6476
2155	2161	3.6441
7078	7439	3.6441
1373	5009	3.6434
1289	1277	3.6403
5913	285489	3.6378
5634	5631	3.6355
493753	1340	3.635
493753	22868	3.635
1340	22868	3.635
3630	3767	3.6347
2916	60506	3.6332
3674	2811	3.6328
6927	3172	3.6328
5157	8312	3.6325
5664	8864	3.6302
9333	27032	3.6276
6392	7428	3.6261
56623	51259	3.6244
3674	2812	3.6196
3674	2815	3.6196
7045	4070	3.6194
7873	6690	3.6148
2147	5054	3.6104
3082	51168	3.6099
8504	5189	3.6082
8504	55670	3.6082
5189	5195	3.6082
5189	5824	3.6082
5195	55670	3.6082
55670	5824	3.6082
2308	5002	3.6053
5002	5081	3.6053
7067	7253	3.602
4893	207	3.6007
3659	2064	3.595
5157	1499	3.5943
5795	675	3.5914
8313	675	3.5914
27030	675	3.5914
675	2033	3.5914
3859	83959	3.5905
3850	83959	3.5905
3868	3848	3.5902
5795	7157	3.5877
57716	4359	3.5877
7157	8313	3.5877
7157	27030	3.5877
7157	2033	3.5877
2799	138050	3.5864
51422	6331	3.5848
6833	3767	3.5839
51062	3798	3.5819
54332	4747	3.5798
4609	596	3.5784
6663	1910	3.5768
9897	6687	3.5747
4747	1959	3.5704
1824	1829	3.5689
4552	27249	3.568
81846	1959	3.5644
5578	1029	3.5632
1406	1121	3.5606
958	57379	3.5577
2157	3998	3.5562
445	5009	3.5545
4669	2799	3.546
10083	65217	3.5452
50506	6528	3.5437
324	5157	3.5421
6331	2702	3.5407
4914	4803	3.5401
55812	9129	3.54
6329	1180	3.5399
5376	4747	3.5398
5376	1959	3.5391
1316	4595	3.5389
3767	2645	3.5382
3000	6121	3.5377
4287	6311	3.5283
3674	2159	3.5282
3640	122042	3.5278
4233	5157	3.5275
4647	7399	3.5269
4647	79955	3.5269
9516	1959	3.5264
3690	2811	3.5261
5318	287	3.5237
5290	5157	3.5232
3690	2812	3.523
3690	2815	3.523
731	1675	3.523
57716	54332	3.5227
5825	5828	3.5226
1824	287	3.5224
10516	2006	3.5194
3032	3030	3.5183
2200	81794	3.5179
9211	1137	3.5179
6654	7249	3.5172
3674	7450	3.5152
1161	2074	3.5141
4137	5663	3.5136
29914	4070	3.5125
7039	5578	3.5119
9573	392255	3.5119
183	185	3.509
185	1636	3.509
344	4023	3.5071
142680	1184	3.5065
1311	4148	3.5059
5318	6331	3.5031
29914	4166	3.5027
7043	3753	3.5016
7043	3757	3.5016
7043	9992	3.5016
11136	6519	3.4992
4166	200576	3.4992
5669	200942	3.499
596	613	3.4987
2147	2155	3.4974
2155	5054	3.4974
7078	24	3.4968
9516	4747	3.495
5345	2158	3.4923
7045	4166	3.4919
1643	2073	3.4918
55812	114902	3.4886
7873	7157	3.4886
65217	64072	3.487
4041	8322	3.4839
4233	1499	3.4825
7157	324	3.4822
4602	613	3.4806
613	3195	3.4806
613	5087	3.4806
2157	2161	3.4787
3426	3075	3.4785
6886	6955	3.4775
2120	4170	3.4768
2120	4066	3.4768
2120	602	3.4768
4291	4170	3.4768
4291	4066	3.4768
4291	602	3.4768
6455	4170	3.4768
6455	4066	3.4768
6455	602	3.4768
4170	2322	3.4768
4170	8021	3.4768
4170	8028	3.4768
4170	4026	3.4768
4170	23365	3.4768
4170	4869	3.4768
4170	4066	3.4768
4170	602	3.4768
4170	8301	3.4768
4170	8833	3.4768
4170	54904	3.4768
4170	1050	3.4768
2322	4066	3.4768
2322	602	3.4768
8021	4066	3.4768
8021	602	3.4768
8028	4066	3.4768
8028	602	3.4768
4026	4066	3.4768
4026	602	3.4768
23365	4066	3.4768
23365	602	3.4768
4869	4066	3.4768
4869	602	3.4768
4066	602	3.4768
4066	8301	3.4768
4066	8833	3.4768
4066	54904	3.4768
4066	1050	3.4768
602	8301	3.4768
602	8833	3.4768
602	54904	3.4768
602	1050	3.4768
5318	7043	3.4761
2243	4069	3.4758
7167	3098	3.4758
7167	669	3.4758
1298	1299	3.4758
5795	324	3.4751
324	8313	3.4751
324	27030	3.4751
324	2033	3.4751
7508	2073	3.4749
64421	5897	3.4745
64421	5896	3.4745
2760	3073	3.474
7507	5429	3.4735
2688	6658	3.4732
10594	55812	3.4713
9129	114902	3.4713
8312	1499	3.4669
2539	2821	3.4654
6005	286	3.4649
6017	8842	3.464
3717	4352	3.4627
675	1029	3.4614
1411	4810	3.4598
2147	3998	3.4597
3998	5054	3.4597
3859	200576	3.4594
3850	200576	3.4594
1406	55812	3.4591
7043	8048	3.4581
435	5009	3.4579
286676	79784	3.4578
286676	11078	3.4578
286676	71	3.4578
286676	1687	3.4578
117531	79784	3.4578
117531	11078	3.4578
117531	71	3.4578
117531	1687	3.4578
7007	79784	3.4578
7007	11078	3.4578
7007	71	3.4578
7007	1687	3.4578
79784	2299	3.4578
79784	9132	3.4578
79784	5962	3.4578
79784	64699	3.4578
79784	2070	3.4578
79784	79977	3.4578
2299	11078	3.4578
2299	71	3.4578
2299	1687	3.4578
11078	9132	3.4578
11078	5962	3.4578
11078	64699	3.4578
11078	2070	3.4578
11078	79977	3.4578
71	9132	3.4578
71	5962	3.4578
71	64699	3.4578
71	2070	3.4578
71	79977	3.4578
1687	9132	3.4578
1687	5962	3.4578
1687	64699	3.4578
1687	2070	3.4578
1687	79977	3.4578
5290	1499	3.4569
8287	3972	3.4534
3630	2645	3.453
10083	64072	3.4502
2263	7291	3.45
2120	861	3.4489
4291	861	3.4489
6455	861	3.4489
861	2322	3.4489
861	8021	3.4489
861	8028	3.4489
861	4026	3.4489
861	23365	3.4489
861	4869	3.4489
861	8301	3.4489
861	8833	3.4489
861	54904	3.4489
861	1050	3.4489
6886	8115	3.4476
8115	6955	3.4476
1203	1200	3.4472
2263	2261	3.4449
54332	1959	3.444
23600	6718	3.4433
153201	8659	3.4413
54716	8659	3.4413
1829	3753	3.4401
1829	3757	3.4401
1829	9992	3.4401
7043	6331	3.4398
3798	65055	3.439
4747	4359	3.4382
7879	4747	3.4367
7873	79577	3.4357
6654	118429	3.4302
1829	51422	3.4295
3040	3043	3.4284
51062	123606	3.4281
582	583	3.4276
582	585	3.4276
582	51057	3.4276
582	79738	3.4276
582	84100	3.4276
582	27241	3.4276
582	55212	3.4276
582	166379	3.4276
582	129880	3.4276
582	123016	3.4276
583	585	3.4276
583	51057	3.4276
583	79738	3.4276
583	84100	3.4276
583	27241	3.4276
583	55212	3.4276
583	166379	3.4276
583	129880	3.4276
583	123016	3.4276
585	51057	3.4276
585	79738	3.4276
585	84100	3.4276
585	27241	3.4276
585	55212	3.4276
585	166379	3.4276
585	129880	3.4276
585	123016	3.4276
51057	79738	3.4276
51057	84100	3.4276
51057	27241	3.4276
51057	55212	3.4276
51057	166379	3.4276
51057	129880	3.4276
51057	123016	3.4276
79738	84100	3.4276
79738	27241	3.4276
79738	55212	3.4276
79738	166379	3.4276
79738	129880	3.4276
79738	123016	3.4276
84100	27241	3.4276
84100	55212	3.4276
84100	166379	3.4276
84100	129880	3.4276
84100	123016	3.4276
27241	55212	3.4276
27241	166379	3.4276
27241	129880	3.4276
27241	123016	3.4276
55212	166379	3.4276
55212	129880	3.4276
55212	123016	3.4276
166379	129880	3.4276
166379	123016	3.4276
129880	123016	3.4276
65217	51168	3.4262
208	5078	3.4253
3172	5078	3.4253
3159	5078	3.4253
5376	81846	3.4243
958	7374	3.4233
79784	3082	3.4201
79784	51168	3.4201
11078	3082	3.4201
11078	51168	3.4201
71	3082	3.4201
71	51168	3.4201
1687	3082	3.4201
1687	51168	3.4201
6654	7248	3.4194
2120	5159	3.4175
4291	5159	3.4175
6455	5159	3.4175
4170	5159	3.4175
2322	5159	3.4175
8021	5159	3.4175
8028	5159	3.4175
4026	5159	3.4175
23365	5159	3.4175
4869	5159	3.4175
4066	5159	3.4175
5159	602	3.4175
5159	8301	3.4175
5159	8833	3.4175
5159	54904	3.4175
5159	1050	3.4175
1829	8048	3.4159
4286	7299	3.4148
1308	3909	3.4092
4148	1280	3.409
5318	3784	3.4087
2796	6658	3.4084
7480	7476	3.4082
4254	103	3.4071
958	200942	3.4066
5795	201163	3.4063
201163	8313	3.4063
201163	27030	3.4063
201163	2033	3.4063
4292	1029	3.406
4436	1029	3.406
2160	5742	3.4034
5742	7450	3.4033
3784	10021	3.4033
3690	7450	3.4025
2731	2653	3.4025
2731	275	3.4025
2653	275	3.4025
355	200942	3.3997
2539	7167	3.3993
3110	81839	3.3985
6005	2040	3.3981
7476	64327	3.3968
435	445	3.396
9516	81846	3.3938
50846	6736	3.3933
59344	242	3.3932
10083	51168	3.3894
5626	6658	3.3871
7157	675	3.387
2153	2159	3.3865
4297	4602	3.3861
4297	3195	3.3861
4297	5087	3.3861
5956	8842	3.3859
1302	1280	3.3857
54332	81846	3.3825
54714	5956	3.382
675	79577	3.3819
84059	7399	3.3805
84059	79955	3.3805
1421	8419	3.3799
9897	6683	3.3798
3549	658	3.3789
29914	30813	3.3766
948	3673	3.374
3690	3673	3.3735
2153	196527	3.3733
5376	9516	3.3703
3859	4166	3.3675
3850	4166	3.3675
121512	79628	3.3627
3691	3909	3.3608
7381	27089	3.3594
7381	54902	3.3594
27089	54902	3.3594
7450	64805	3.357
5625	8659	3.3569
1406	5961	3.3555
4204	6792	3.3541
8200	9241	3.3434
7077	8438	3.3432
7077	83990	3.3432
7077	8493	3.3432
7077	9821	3.3432
8438	85320	3.3432
83990	85320	3.3432
8493	85320	3.3432
9821	85320	3.3432
65055	9897	3.343
7169	7136	3.341
7169	7140	3.341
4148	4322	3.3409
89884	6658	3.3373
1829	6331	3.3354
1121	6102	3.3351
6005	6521	3.3304
51422	10021	3.3302
81846	4359	3.33
9380	189	3.3283
5224	5837	3.328
9211	6326	3.3279
1203	2055	3.3276
149461	10686	3.3273
4292	2308	3.3262
4292	5081	3.3262
2308	4436	3.3262
4436	5081	3.3262
6390	23095	3.326
9897	9420	3.3251
3630	6833	3.3225
5376	54332	3.3222
1121	285440	3.3222
5795	5290	3.3218
5290	8313	3.3218
5290	27030	3.3218
5290	2033	3.3218
7051	59344	3.3195
7051	242	3.3195
6708	2038	3.3188
23414	1482	3.3186
1824	3784	3.3168
8200	64327	3.3157
462	3053	3.3157
1675	5199	3.3157
55812	5961	3.3148
183	5972	3.3145
1636	5972	3.3145
324	8312	3.3143
1643	2068	3.3137
7157	207	3.3092
5205	8647	3.3085
3730	1630	3.3075
1188	6557	3.3055
7067	6528	3.3048
54332	9516	3.3046
2876	6708	3.3039
80208	9897	3.303
55812	6102	3.3028
9622	286077	3.3019
7067	7173	3.3009
3209	658	3.3001
7157	8312	3.2997
2159	2162	3.2991
65217	7399	3.2989
65217	79955	3.2989
3708	2259	3.2979
4621	7136	3.2973
4621	7140	3.2973
6710	6521	3.295
7067	7080	3.2939
6710	2038	3.2918
595	7873	3.2901
7507	2068	3.2899
3848	127534	3.2886
3848	2707	3.2886
1200	54982	3.2874
1836	1280	3.2865
5345	5742	3.2864
1300	4148	3.2863
2159	2157	3.2849
5657	720	3.2847
7157	4893	3.2838
7051	3849	3.2835
2308	5077	3.2818
5077	5081	3.2818
80270	6718	3.2814
4170	613	3.2813
4066	613	3.2813
582	8195	3.2793
583	8195	3.2793
585	8195	3.2793
51057	8195	3.2793
79738	8195	3.2793
8195	84100	3.2793
8195	27241	3.2793
8195	55212	3.2793
8195	166379	3.2793
8195	129880	3.2793
8195	123016	3.2793
1718	6654	3.2787
1406	10594	3.2782
7157	1499	3.2773
8988	3315	3.2767
207	675	3.2757
51062	6687	3.2756
2157	2165	3.2753
9516	4359	3.2748
1300	3549	3.2747
2159	3690	3.2746
596	1066	3.274
5157	207	3.2737
8200	2192	3.2734
3859	1296	3.2711
3850	1296	3.2711
7173	50506	3.27
1908	1910	3.2692
843	200942	3.2684
2157	5742	3.2681
2157	7450	3.2661
2956	2308	3.2655
2956	5081	3.2655
5395	2308	3.2655
5395	5081	3.2655
2161	3818	3.2632
10397	9516	3.2629
7450	2812	3.2607
7450	2815	3.2607
7490	675	3.2586
9657	261734	3.2559
6017	6010	3.2556
8438	5002	3.2556
83990	5002	3.2556
8493	5002	3.2556
9821	5002	3.2556
2916	6295	3.254
60506	6295	3.254
6389	644096	3.254
6295	5959	3.254
51422	287	3.2536
4609	1066	3.2535
3798	6687	3.2525
3849	3848	3.2506
54332	4359	3.2504
861	613	3.2478
6340	1585	3.2478
6338	1585	3.2478
6770	1589	3.2477
8048	2771	3.2475
9129	8842	3.2474
23600	80270	3.2466
1103	1145	3.2446
3858	3849	3.2442
3691	1308	3.244
2896	5663	3.2422
7168	7139	3.2419
9129	5961	3.2414
5318	6262	3.2408
324	6654	3.2407
1373	445	3.2405
6928	3172	3.2397
7508	2068	3.2396
2120	4609	3.2395
4291	4609	3.2395
4609	6455	3.2395
4609	4170	3.2395
4609	2322	3.2395
4609	8021	3.2395
4609	8028	3.2395
4609	4026	3.2395
4609	23365	3.2395
4609	4869	3.2395
4609	4066	3.2395
4609	5159	3.2395
4609	602	3.2395
4609	8301	3.2395
4609	8833	3.2395
4609	54904	3.2395
4609	1050	3.2395
26121	762	3.2395
26121	7287	3.2395
762	7287	3.2395
5290	207	3.2392
6103	6102	3.2382
2263	2260	3.238
2120	4342	3.2379
4291	4342	3.2379
6455	4342	3.2379
2322	4342	3.2379
8021	4342	3.2379
8028	4342	3.2379
4026	4342	3.2379
23365	4342	3.2379
4869	4342	3.2379
8301	4342	3.2379
8833	4342	3.2379
54904	4342	3.2379
4342	1050	3.2379
6005	2876	3.2357
6785	9129	3.2343
2006	30008	3.2331
4893	5157	3.2326
5314	27031	3.2319
79784	11078	3.2303
11078	71	3.2303
11078	1687	3.2303
930	5669	3.2302
11236	201163	3.2293
84925	201163	3.2293
4968	201163	3.2293
324	4893	3.2281
2153	2155	3.2272
5795	2308	3.2271
5795	5081	3.2271
2308	8313	3.2271
2308	27030	3.2271
2308	2033	3.2271
8313	5081	3.2271
27030	5081	3.2271
2033	5081	3.2271
1411	10484	3.2265
2876	6710	3.2265
6559	6557	3.2259
185	5972	3.2245
8022	6658	3.2229
5159	613	3.222
4609	861	3.2219
3717	54583	3.221
286676	1729	3.2203
117531	1729	3.2203
7007	1729	3.2203
1729	2299	3.2203
1729	9132	3.2203
1729	5962	3.2203
1729	64699	3.2203
1729	2070	3.2203
1729	79977	3.2203
1630	392255	3.2202
6708	6521	3.2197
2539	226	3.2186
8438	207	3.218
83990	207	3.218
8493	207	3.218
9821	207	3.218
6870	84634	3.2173
6866	84634	3.2173
84634	26012	3.2173
84634	60675	3.2173
7003	23418	3.2164
6591	1908	3.2164
145282	64327	3.216
5345	2165	3.2138
2165	5742	3.2138
6326	1137	3.2131
55572	4724	3.2129
55572	91942	3.2129
4724	91942	3.2129
4286	6591	3.2124
7507	2073	3.2107
51371	3848	3.2093
10117	9622	3.2076
7249	4330	3.2074
6442	79147	3.2073
335	4069	3.206
4089	2022	3.2058
7827	51196	3.2052
7043	51422	3.2046
4893	675	3.2039
55812	8842	3.202
55812	6295	3.2011
65055	123606	3.2011
6399	1280	3.2005
3758	6559	3.2
8438	1029	3.1998
83990	1029	3.1998
8493	1029	3.1998
9821	1029	3.1998
10804	6303	3.1991
7048	4851	3.1969
9129	6100	3.1937
9129	6101	3.1937
9129	3614	3.1937
10558	7879	3.1932
5795	1029	3.1923
8313	1029	3.1923
27030	1029	3.1923
2033	1029	3.1923
2153	2812	3.1922
2153	2815	3.1922
401	55605	3.1915
2158	7450	3.1907
10083	4647	3.1885
3690	5742	3.1881
286077	265	3.188
7046	4851	3.1872
4297	4170	3.1871
4297	4066	3.1871
4297	602	3.1871
959	57379	3.1859
1421	2703	3.1856
4204	7337	3.1854
1311	1300	3.1845
2702	287	3.1842
6591	5077	3.1842
1729	3082	3.1826
1729	51168	3.1826
4221	7873	3.1823
2746	6566	3.1812
324	1499	3.1804
6247	1121	3.1794
582	80184	3.1785
583	80184	3.1785
585	80184	3.1785
51057	80184	3.1785
79738	80184	3.1785
84100	80184	3.1785
27241	80184	3.1785
55212	80184	3.1785
80184	166379	3.1785
80184	129880	3.1785
80184	123016	3.1785
3674	5742	3.1774
3861	3852	3.1772
5224	3939	3.1763
4297	861	3.176
477	773	3.1758
6399	4148	3.1752
5741	846	3.1751
846	9247	3.1751
6295	9129	3.1746
9381	286676	3.174
9381	117531	3.174
9381	7007	3.174
9381	2299	3.174
9381	9132	3.174
9381	5962	3.174
9381	64699	3.174
9381	2070	3.174
9381	79977	3.174
64175	10491	3.1733
23503	80208	3.1731
324	207	3.1726
2978	83394	3.1711
7067	7252	3.1707
51422	3753	3.1704
51422	3757	3.1704
51422	9992	3.1704
6247	1122	3.1701
4948	7306	3.1689
80326	4487	3.1688
1200	2055	3.1679
55572	4723	3.165
4724	4723	3.165
4723	91942	3.165
5224	5236	3.1641
8292	1145	3.1634
208	6927	3.1628
6927	3159	3.1628
3674	64805	3.162
11186	1326	3.1607
11186	5519	3.1607
11186	9940	3.1607
11186	1956	3.1607
1326	5519	3.1607
1326	9940	3.1607
1326	1956	3.1607
5519	9940	3.1607
5519	1956	3.1607
9940	1956	3.1607
5961	6100	3.1603
5961	6101	3.1603
5961	3614	3.1603
1406	5959	3.1601
2147	2161	3.1584
2147	196527	3.1584
2161	5054	3.1584
3791	5578	3.1584
196527	5054	3.1584
4148	3549	3.1575
7450	196527	3.1571
2192	64327	3.1567
3690	64805	3.1542
9533	6949	3.1538
7003	1122	3.1532
1387	1630	3.153
23503	9897	3.1515
9639	9516	3.1515
56246	9095	3.1509
596	25	3.149
50506	7253	3.1482
6208	212	3.148
7043	3784	3.1475
91647	54968	3.1472
3758	1188	3.1471
7078	1001	3.1461
83394	6785	3.1459
2160	7450	3.1439
55788	4552	3.1438
24	8842	3.1433
6010	5158	3.1431
4607	6331	3.143
94	4089	3.1429
5624	3053	3.1426
1184	6569	3.1425
7879	54332	3.1424
8200	3209	3.1423
10984	64324	3.1409
64324	1028	3.1409
4166	4070	3.1397
6687	123606	3.1396
5205	1244	3.1394
930	200942	3.139
9381	3082	3.1363
9381	51168	3.1363
3329	9897	3.1352
6440	6439	3.135
10381	55605	3.1348
8195	80184	3.1334
7248	4330	3.1329
5669	1675	3.1319
5327	3273	3.1309
4602	3195	3.1309
4602	5087	3.1309
5155	4330	3.1309
3195	5087	3.1309
4607	10021	3.1304
5961	114902	3.1302
959	200942	3.1299
23503	3798	3.1299
1145	1144	3.1292
1145	1134	3.1292
23590	54840	3.1288
27235	54840	3.1288
56997	54840	3.1288
54840	57017	3.1288
54840	57107	3.1288
4297	5159	3.1278
7879	81846	3.1274
5158	6100	3.1271
5158	6101	3.1271
5158	3614	3.1271
116085	7369	3.127
5742	64805	3.1248
7439	5956	3.1247
2159	7450	3.1243
29078	4719	3.1243
29078	4694	3.1243
29078	80224	3.1243
29078	126328	3.1243
29078	79133	3.1243
29078	25915	3.1243
29078	4729	3.1243
29078	4726	3.1243
29078	4720	3.1243
4719	4694	3.1243
4719	80224	3.1243
4719	126328	3.1243
4719	79133	3.1243
4719	25915	3.1243
4719	4729	3.1243
4719	4726	3.1243
4719	4720	3.1243
4694	80224	3.1243
4694	126328	3.1243
4694	79133	3.1243
4694	25915	3.1243
4694	4729	3.1243
4694	4726	3.1243
4694	4720	3.1243
80224	126328	3.1243
80224	79133	3.1243
80224	25915	3.1243
80224	4729	3.1243
80224	4726	3.1243
80224	4720	3.1243
126328	79133	3.1243
126328	25915	3.1243
126328	4729	3.1243
126328	4726	3.1243
126328	4720	3.1243
79133	25915	3.1243
79133	4729	3.1243
79133	4726	3.1243
79133	4720	3.1243
25915	4729	3.1243
25915	4726	3.1243
25915	4720	3.1243
4729	4726	3.1243
4729	4720	3.1243
4726	4720	3.1243
5313	3039	3.1241
1300	1280	3.1238
2645	3172	3.1237
114902	6100	3.1235
114902	6101	3.1235
114902	3614	3.1235
51371	3858	3.1224
3859	4070	3.1218
3850	4070	3.1218
4292	4609	3.1215
4609	4436	3.1215
8287	367	3.1214
6770	190	3.1192
6440	21	3.1191
6736	207	3.1184
2201	4851	3.1179
7480	64327	3.1178
6017	64218	3.1169
3854	80326	3.1168
80326	3872	3.1168
1406	9129	3.1165
4233	7157	3.1145
401	10381	3.1143
1836	2317	3.1142
11236	6927	3.1138
84925	6927	3.1138
4968	6927	3.1138
54332	26353	3.1133
3798	9420	3.1129
596	861	3.1121
8675	2778	3.1118
2778	149775	3.1118
4254	3852	3.1111
6473	3549	3.1105
3798	80208	3.1081
51062	6683	3.1079
1828	9733	3.1077
3798	6683	3.1074
29914	285440	3.1073
860	1513	3.1069
286676	64072	3.1059
117531	64072	3.1059
7007	64072	3.1059
2299	64072	3.1059
64072	9132	3.1059
64072	5962	3.1059
64072	64699	3.1059
64072	2070	3.1059
64072	79977	3.1059
6017	10002	3.1057
6792	8864	3.1045
7337	8864	3.1043
10002	8842	3.104
8291	9499	3.1037
999	5290	3.1036
5318	8048	3.1032
613	1066	3.1028
1824	51422	3.1026
6017	7078	3.1013
2157	2160	3.1012
2202	6247	3.1007
1733	7173	3.099
7450	2811	3.0984
486	149461	3.0983
57716	7879	3.0981
8842	6100	3.0959
8842	6101	3.0959
8842	3614	3.0959
2192	9241	3.0956
4644	5873	3.0954
4233	324	3.0953
10117	265	3.0938
5189	5828	3.0937
55670	5828	3.0937
121512	1959	3.0932
4882	3549	3.0928
23418	1122	3.0927
5345	2160	3.0915
1280	54808	3.0914
1406	64218	3.0897
4647	65217	3.0894
91147	23322	3.0891
2243	335	3.0891
57465	2566	3.0891
9516	26353	3.0891
83394	9129	3.0887
26580	2617	3.0882
7439	8842	3.0878
1829	3784	3.086
404672	2068	3.0844
3784	8048	3.0836
54714	2652	3.0828
3674	2162	3.082
6768	6303	3.0807
27249	25974	3.0786
4204	8864	3.0783
5959	64218	3.0782
6392	23095	3.0776
2073	2068	3.0776
1829	287	3.0774
3708	146227	3.0774
7043	287	3.0768
8048	287	3.0768
2157	2677	3.0762
6390	5979	3.076
486	6559	3.0759
6356	30009	3.0757
80208	6687	3.0749
83394	114902	3.0748
2040	6521	3.0743
2956	4609	3.0733
4609	5395	3.0733
207	1029	3.0728
1280	4322	3.0711
286676	5456	3.071
117531	5456	3.071
7007	5456	3.071
2299	5456	3.071
9132	5456	3.071
5962	5456	3.071
64699	5456	3.071
2070	5456	3.071
79977	5456	3.071
5290	324	3.0707
999	207	3.0702
3315	4747	3.0699
1373	435	3.0698
5669	3047	3.0697
3098	226	3.0687
226	669	3.0687
64072	3082	3.0682
64072	51168	3.0682
51422	3784	3.067
595	3791	3.0666
3753	8048	3.0666
3757	8048	3.0666
8048	9992	3.0666
3315	81857	3.0653
27032	1041	3.0648
3239	64327	3.0636
56623	54806	3.0636
6794	7873	3.0635
7157	5290	3.0611
9368	1184	3.061
6687	6683	3.0607
64327	658	3.06
4621	7169	3.059
3315	54332	3.0589
7043	70	3.0576
10594	9129	3.057
4148	1298	3.0547
57716	121512	3.0532
78987	4093	3.0528
8842	114902	3.0528
3858	27032	3.0525
7067	1733	3.0512
1733	50506	3.0512
336	4023	3.0512
4023	3949	3.0512
4023	2053	3.0512
5290	8312	3.051
80208	9420	3.051
375790	285489	3.0508
11155	9499	3.0502
859	1180	3.0472
5318	51422	3.0463
2158	5742	3.046
6687	9420	3.0456
29929	196527	3.0453
10594	6100	3.0453
10594	6101	3.0453
10594	3614	3.0453
4292	5795	3.045
4292	8313	3.045
4292	27030	3.045
4292	2033	3.045
5795	4436	3.045
4436	8313	3.045
4436	27030	3.045
4436	2033	3.045
6591	1910	3.0448
1244	10165	3.0441
582	22954	3.044
583	22954	3.044
585	22954	3.044
51057	22954	3.044
22954	79738	3.044
22954	84100	3.044
22954	27241	3.044
22954	55212	3.044
22954	166379	3.044
22954	129880	3.044
22954	123016	3.044
121512	54332	3.044
121512	9516	3.0436
2301	2703	3.0431
6331	8048	3.042
3239	2192	3.0402
404672	2071	3.0397
55812	6103	3.0397
6010	6100	3.0394
6010	6101	3.0394
6010	3614	3.0394
2896	25978	3.0368
2159	2161	3.0362
65266	6340	3.0359
65266	6338	3.0359
4593	5913	3.0358
3708	10939	3.0352
7846	5048	3.0352
2159	2677	3.0347
2539	286	3.0338
3082	5456	3.0334
51168	5456	3.0334
1406	6100	3.0332
1406	6101	3.0332
1406	3614	3.0332
7003	1462	3.0328
4292	8438	3.0309
4292	83990	3.0309
4292	8493	3.0309
4292	9821	3.0309
8438	4436	3.0309
83990	4436	3.0309
8493	4436	3.0309
9821	4436	3.0309
7476	3549	3.0304
55812	5158	3.0303
8842	2652	3.0296
7879	9516	3.0292
7015	1736	3.0282
7012	1736	3.0282
116085	5631	3.0279
6295	114902	3.0276
2120	4602	3.0273
2120	2242	3.0273
2120	5914	3.0273
2120	3195	3.0273
2120	5087	3.0273
4291	4602	3.0273
4291	2242	3.0273
4291	5914	3.0273
4291	3195	3.0273
4291	5087	3.0273
4602	6455	3.0273
4602	2322	3.0273
4602	8021	3.0273
4602	8028	3.0273
4602	4026	3.0273
4602	23365	3.0273
4602	4869	3.0273
4602	8301	3.0273
4602	8833	3.0273
4602	54904	3.0273
4602	1050	3.0273
6455	2242	3.0273
6455	5914	3.0273
6455	3195	3.0273
6455	5087	3.0273
2242	2322	3.0273
2242	8021	3.0273
2242	8028	3.0273
2242	4026	3.0273
2242	23365	3.0273
2242	4869	3.0273
2242	8301	3.0273
2242	8833	3.0273
2242	54904	3.0273
2242	1050	3.0273
2322	5914	3.0273
2322	3195	3.0273
2322	5087	3.0273
8021	5914	3.0273
8021	3195	3.0273
8021	5087	3.0273
8028	5914	3.0273
8028	3195	3.0273
8028	5087	3.0273
4026	5914	3.0273
4026	3195	3.0273
4026	5087	3.0273
23365	5914	3.0273
23365	3195	3.0273
23365	5087	3.0273
4869	5914	3.0273
4869	3195	3.0273
4869	5087	3.0273
8301	5914	3.0273
8301	3195	3.0273
8301	5087	3.0273
5914	8833	3.0273
5914	54904	3.0273
5914	1050	3.0273
8833	3195	3.0273
8833	5087	3.0273
54904	3195	3.0273
54904	5087	3.0273
3195	1050	3.0273
1050	5087	3.0273
7067	389434	3.0272
7066	5159	3.0272
594	593	3.0266
594	1629	3.0266
593	1629	3.0266
5741	140803	3.0263
9247	140803	3.0263
3766	6559	3.0262
286	6521	3.0258
8287	3077	3.0248
3674	2160	3.024
207	1499	3.024
5172	51168	3.0232
4548	27249	3.0215
1828	127534	3.0209
1828	2707	3.0209
999	8438	3.0208
999	83990	3.0208
999	8493	3.0208
999	9821	3.0208
1785	9516	3.0207
7879	9927	3.0207
3791	7428	3.0206
29958	6566	3.0202
8292	1140	3.0198
4618	1785	3.0195
80208	123606	3.0189
8200	7476	3.0178
2160	2811	3.0167
2071	2068	3.0166
3728	3753	3.0164
3728	3757	3.0164
3728	9992	3.0164
1643	5578	3.0159
7508	5578	3.0154
1829	70	3.0153
2120	8115	3.0126
4291	8115	3.0126
6455	8115	3.0126
8115	4170	3.0126
8115	2322	3.0126
8115	8021	3.0126
8115	8028	3.0126
8115	4026	3.0126
8115	23365	3.0126
8115	4869	3.0126
8115	4066	3.0126
8115	602	3.0126
8115	8301	3.0126
8115	8833	3.0126
8115	54904	3.0126
8115	1050	3.0126
3857	127534	3.0124
3857	2707	3.0124
2162	2160	3.0121
196527	4351	3.0114
121512	81846	3.0094
9321	1280	3.0076
5236	5837	3.0075
91147	57545	3.0072
6683	123606	3.0072
1121	6103	3.0071
4893	1029	3.0065
1406	6102	3.0064
4625	7273	3.0061
7879	23095	3.0061
54808	3549	3.006
1140	5913	3.006
324	1029	3.0056
1300	8838	3.0054
6658	1027	3.0043
121512	4747	3.0041
3690	6916	3.0039
930	1675	3.0027
2155	2157	3.0016
5159	4352	3.0016
6017	5158	3.0015
80208	65055	3.0003
2538	10786	3.0001
1736	55505	3.0001
1736	55651	3.0001
2160	2165	2.9999
23503	65055	2.9996
5264	5191	2.9989
7450	3998	2.9987
4292	324	2.9981
324	4436	2.9981
4552	25974	2.9975
29851	5897	2.9974
29851	5896	2.9974
70	6331	2.9967
1828	3857	2.9966
2202	23418	2.9966
4867	261734	2.996
8287	2796	2.995
1301	1280	2.9947
5742	2811	2.9937
1729	11078	2.9928
1311	1280	2.9915
9241	3549	2.9905
10021	4878	2.9904
1406	114902	2.9897
7157	8438	2.9887
7157	83990	2.9887
7157	8493	2.9887
7157	9821	2.9887
51422	2702	2.9885
1187	6557	2.9884
348	351	2.9877
6247	1462	2.9877
2317	1280	2.9875
5244	8647	2.9871
1617	50511	2.9871
7476	658	2.9861
3859	30813	2.9858
3850	30813	2.9858
23495	5897	2.9857
23495	5896	2.9857
4976	5956	2.9855
4286	5077	2.9845
9516	81857	2.9837
65266	65125	2.9834
4148	54808	2.9834
5961	64218	2.9832
2736	6658	2.9828
8048	2702	2.9826
57545	23322	2.9825
8287	55315	2.9807
2308	4893	2.9807
4893	5081	2.9807
1145	5913	2.9805
2876	286	2.98
55812	285440	2.9789
6399	1297	2.9785
3047	200942	2.9785
5742	6916	2.9781
10397	81846	2.9775
6473	64327	2.9773
2308	207	2.9773
207	5081	2.9773
2324	54345	2.9772
2160	2677	2.9758
2978	200576	2.9745
1311	1298	2.9731
411	2720	2.9731
930	5897	2.973
930	5896	2.973
286676	65217	2.973
117531	65217	2.973
65217	7007	2.973
65217	2299	2.973
65217	9132	2.973
65217	5962	2.973
65217	64699	2.973
65217	2070	2.973
65217	79977	2.973
9217	6606	2.9729
5256	5836	2.9726
6785	114902	2.9725
124583	3549	2.9721
3798	3329	2.9717
6834	137682	2.9712
6834	4695	2.9712
6834	1355	2.9712
6834	374291	2.9712
6834	4728	2.9712
6834	4722	2.9712
137682	4695	2.9712
137682	1355	2.9712
137682	374291	2.9712
137682	4728	2.9712
137682	4722	2.9712
4695	1355	2.9712
4695	374291	2.9712
4695	4728	2.9712
4695	4722	2.9712
1355	374291	2.9712
1355	4728	2.9712
1355	4722	2.9712
1311	4322	2.9712
374291	4728	2.9712
374291	4722	2.9712
[truncated: 24,198 more rows]
